# Supplementary material for: Chemical synthesis of linear ADP-ribose oligomers up to pentamer and their binding to the oncogenic helicase ALC1
Source: PubMed Central journal article supplement (PMC8480336; doi:10.1039/d1sc02340c), 2021-08-18

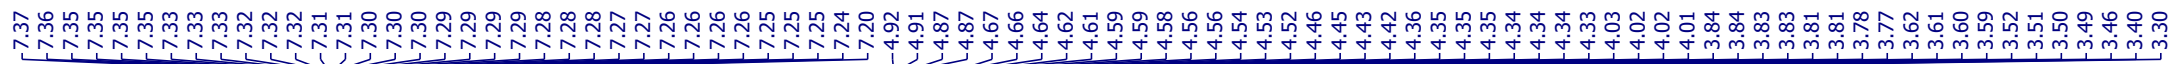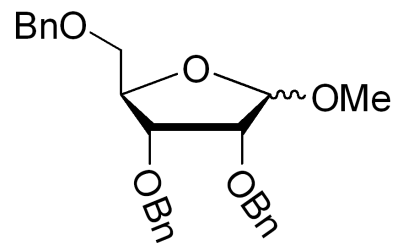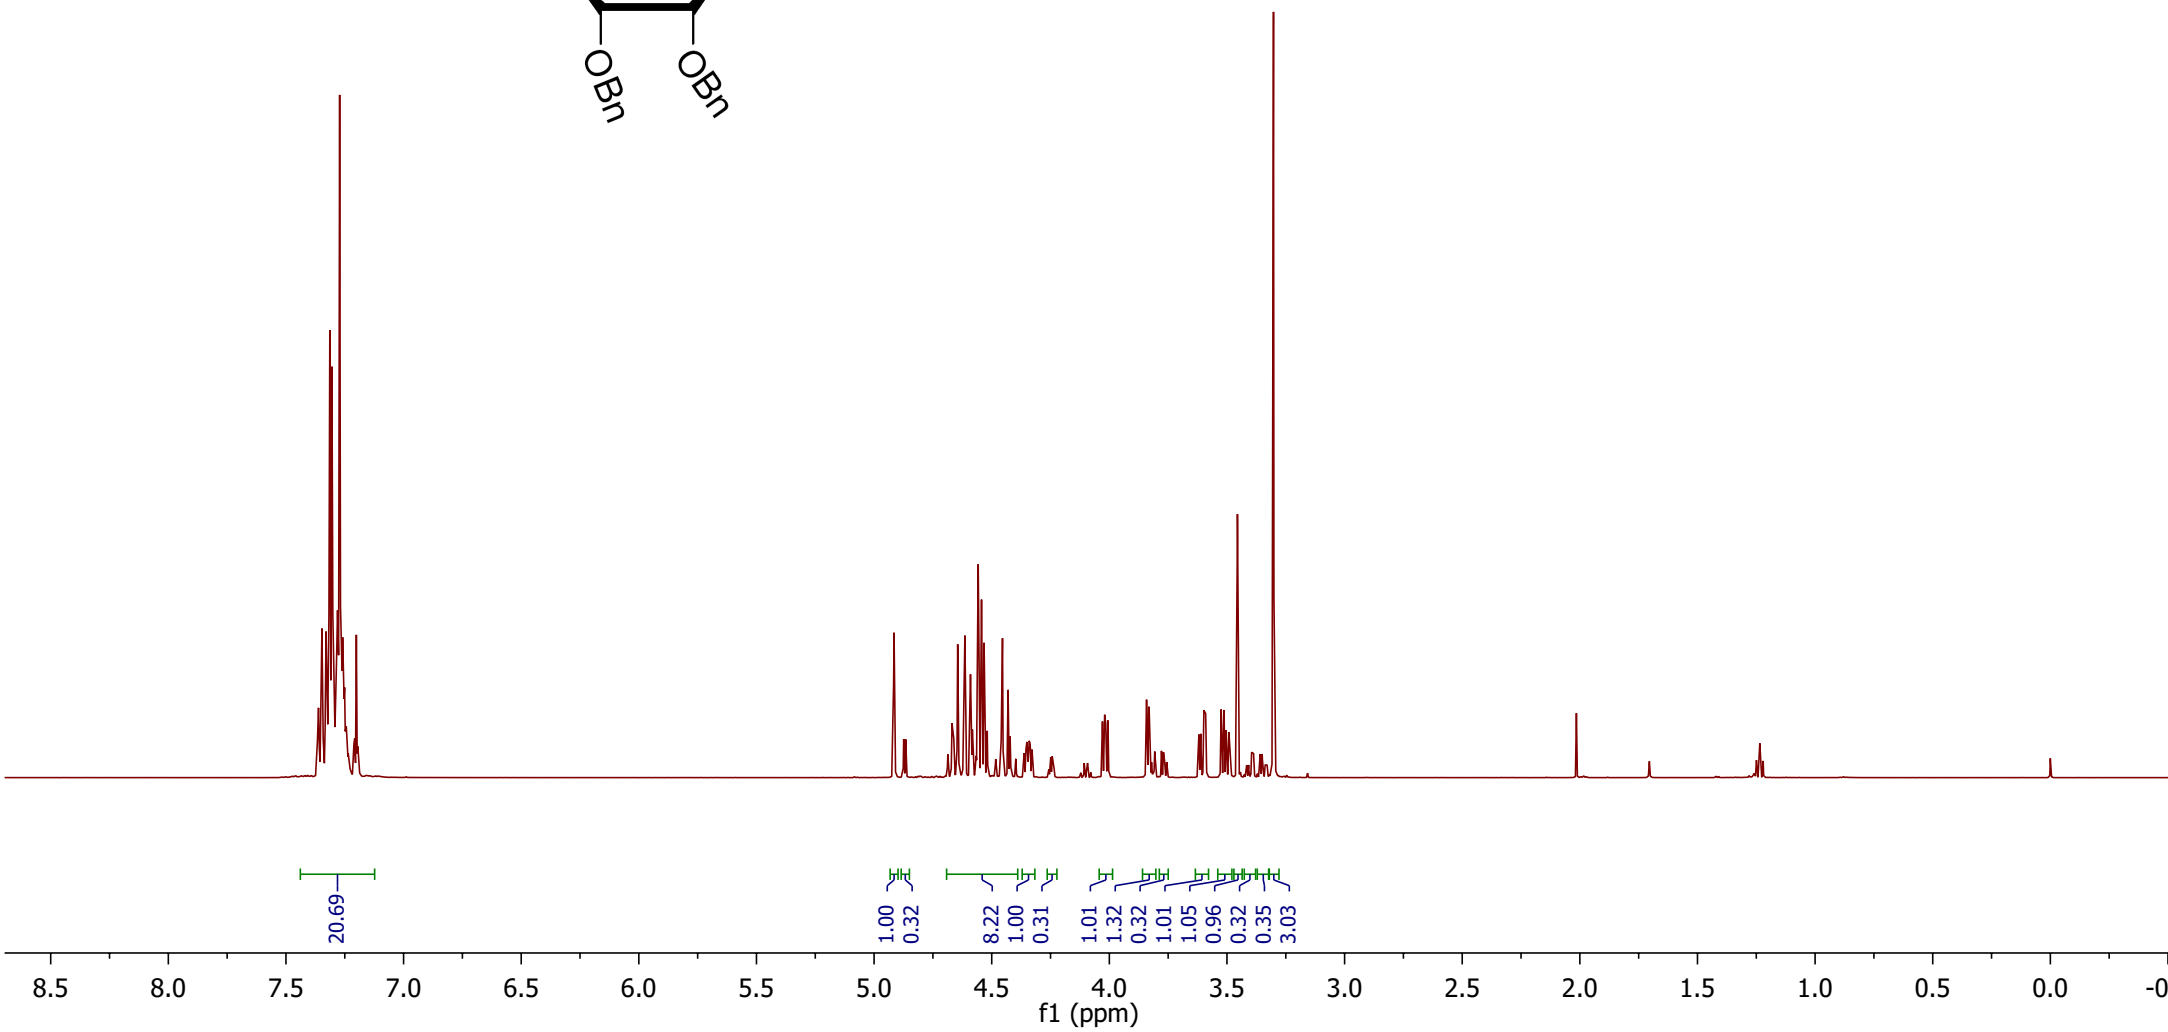

Compound **5**,  $^{13}\text{C}$ -NMR,  $\text{CDCl}_3$ , 126 MHz

138.37  
138.31  
137.98  
137.89  
137.87  
128.44  
128.41  
128.39  
128.35  
128.34  
128.31  
128.05  
127.99  
127.95  
127.91  
127.84  
127.80  
127.71  
127.69  
127.67  
127.63  
127.61  
127.54  
106.40  
102.53  
82.15  
80.51  
79.75  
78.44  
77.86  
75.03  
73.48  
73.19  
72.47  
72.45  
72.35  
72.34  
71.37  
70.19  
55.57  
55.09

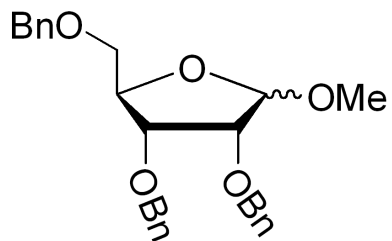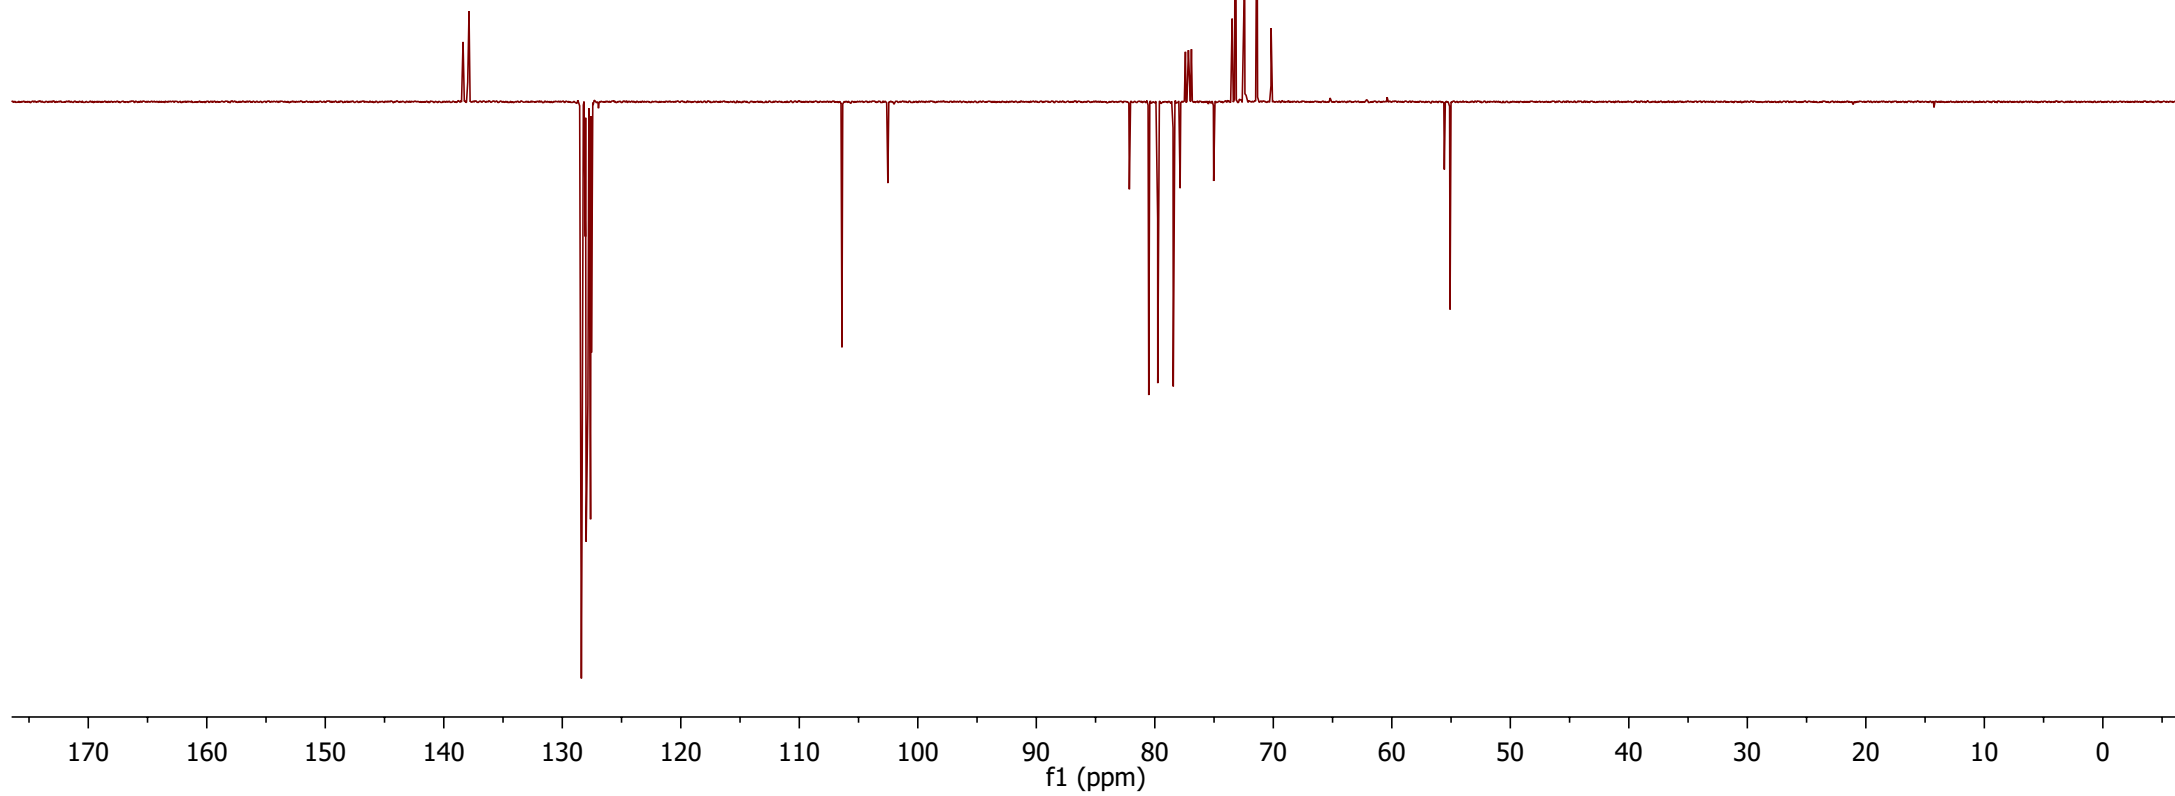

Compound **6**,  $^1\text{H-NMR}$ ,  $\text{CDCl}_3$ , 500 MHz

7.36  
7.34  
7.34  
7.33  
7.33  
7.33  
7.30  
7.30  
7.29  
7.29  
7.29  
7.28  
7.27  
7.27  
7.27  
7.26  
7.26  
7.26  
7.26  
5.11  
5.10  
4.90  
4.89  
4.88  
4.88  
4.67  
4.65  
4.52  
4.50  
4.47  
4.45  
4.45  
4.42  
4.19  
4.19  
4.04  
4.03  
4.02  
4.02  
3.46  
3.45  
3.44  
3.43  
3.33  
3.32  
3.31  
3.30

2.18

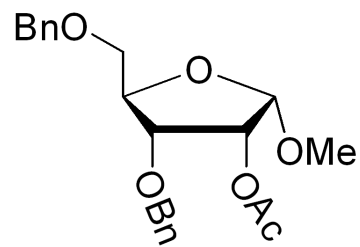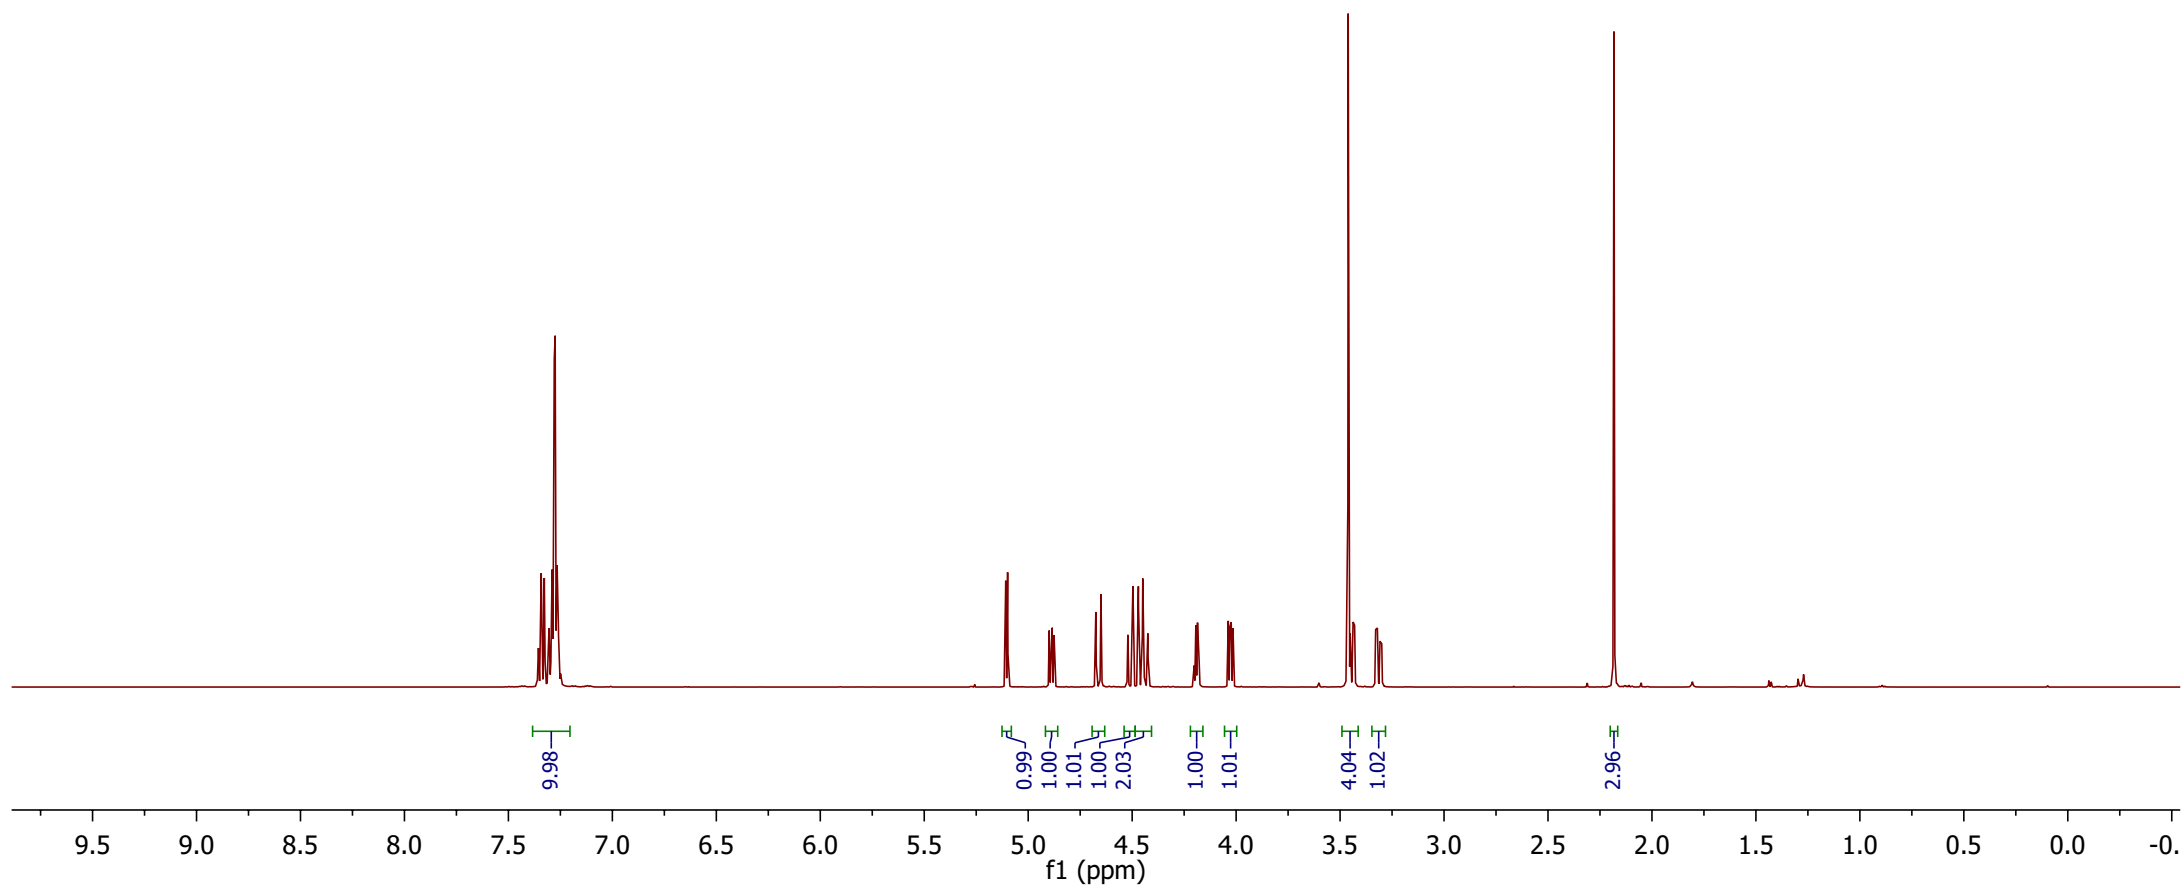

Compound **6**,  $^{13}\text{C}$ -NMR,  $\text{CDCl}_3$ , 126 MHz

—170.22

—137.75

—137.74

—128.21

—128.17

—127.97

—127.67

—127.50

—101.64

—81.36

—75.01

—71.99

—55.40

—20.61

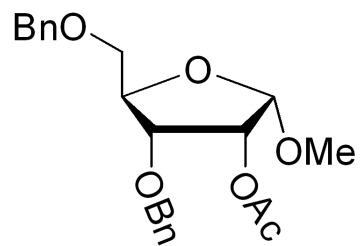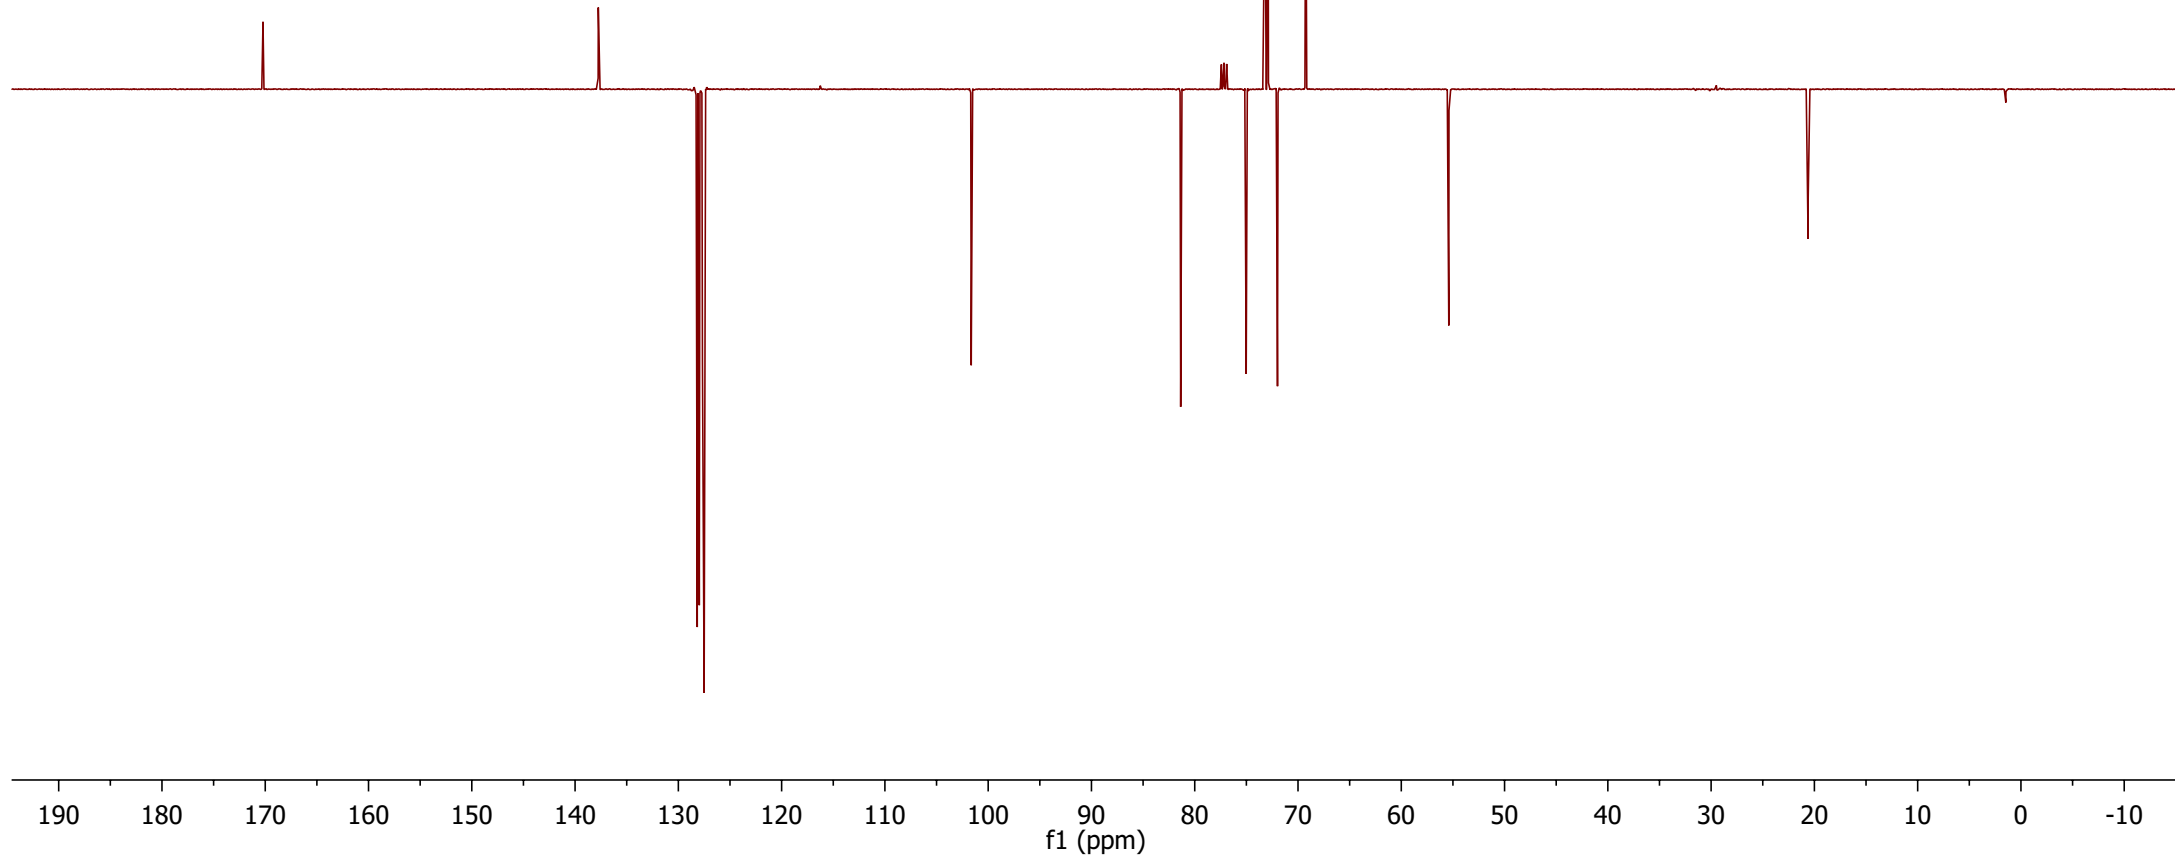

Compound 7,  $^1\text{H-NMR}$ ,  $\text{CDCl}_3$ , 500 MHz

—7.26  $\text{CDCl}_3$

5.28  
5.11  
5.10  
4.97  
4.97  
4.96  
4.95  
4.92  
4.91  
4.76  
4.75  
4.74  
4.21  
4.20  
4.20  
4.19  
4.18  
4.18  
4.17  
4.14  
4.14  
4.13  
4.13  
4.12  
4.06  
4.05  
4.04  
4.04  
3.80  
3.79  
3.78  
3.77  
3.77  
3.76  
3.75  
3.70  
3.70  
3.68  
3.67  
3.67  
3.45  
3.41  
2.85  
2.83  
2.75  
2.73  
2.40  
2.15  
2.14  
2.13  
2.12  
2.11  
2.10  
2.08  
1.23

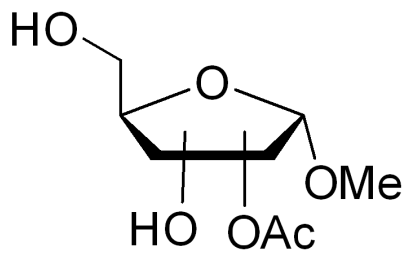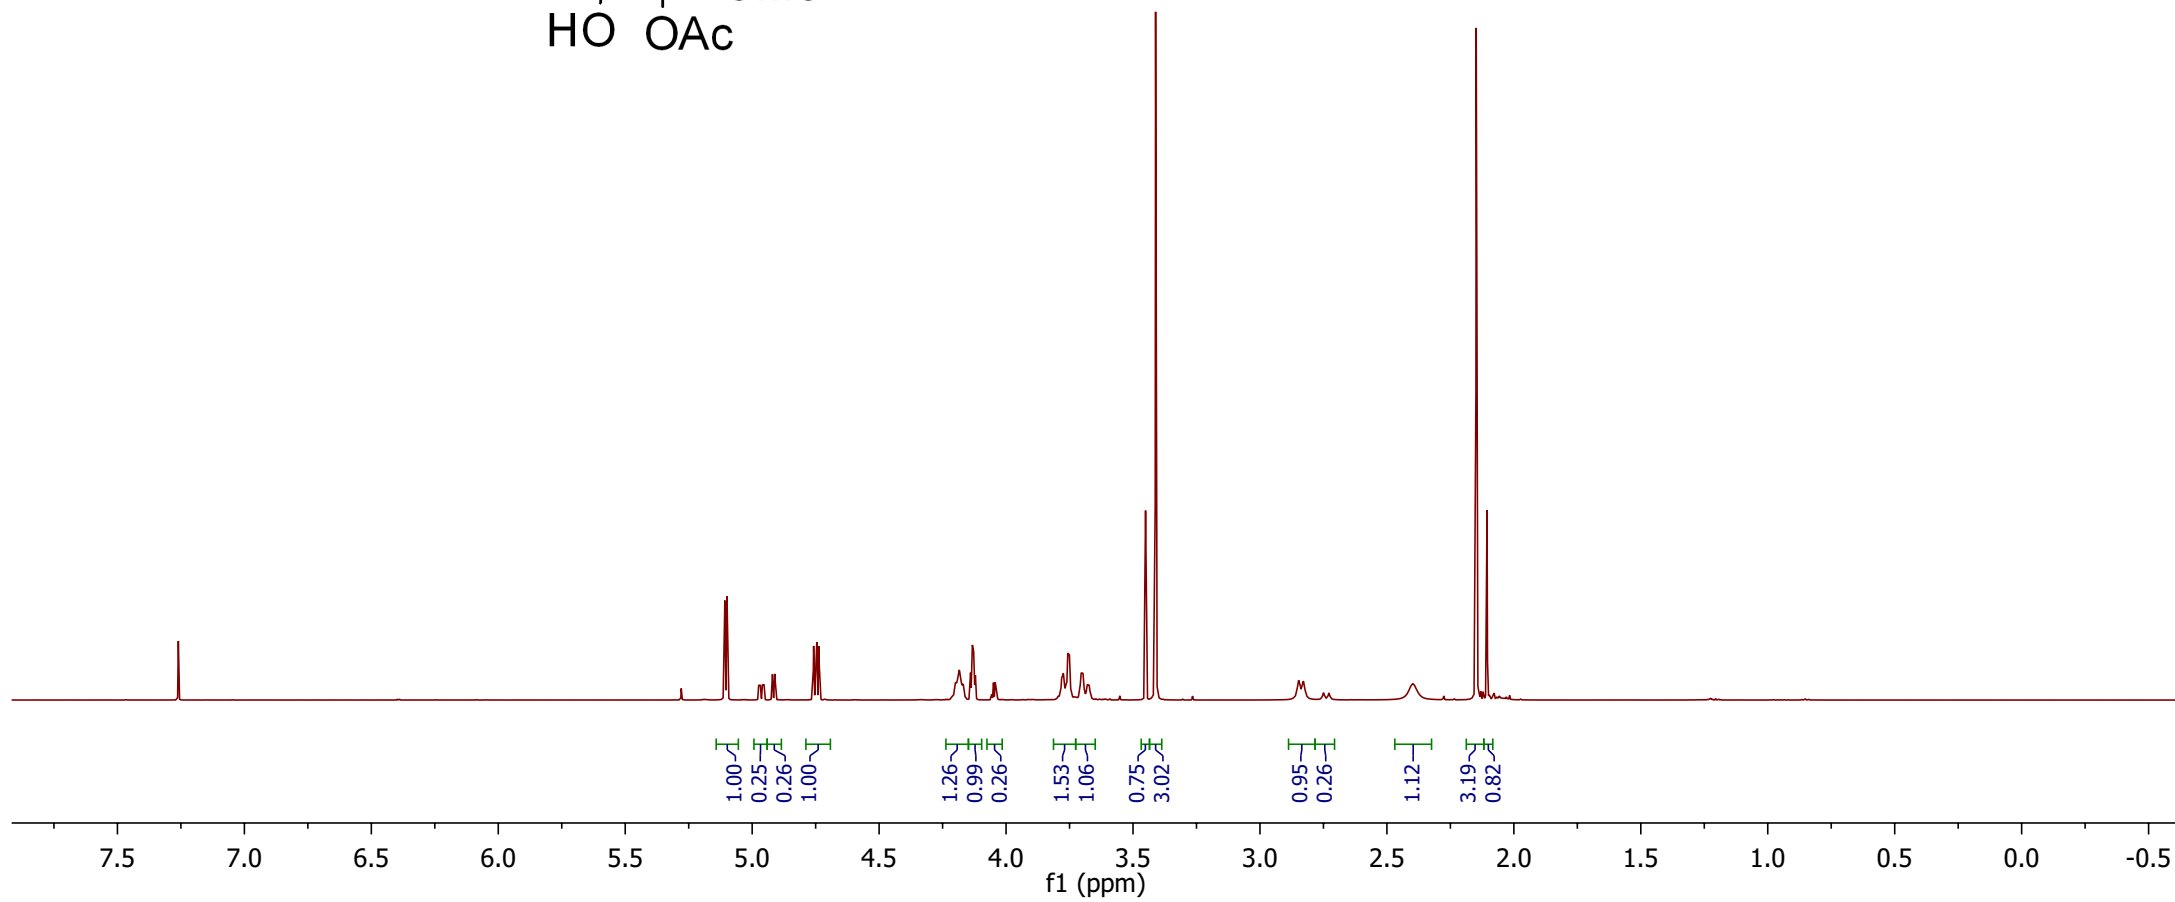

Compound 7,  $^{13}\text{C}$ -NMR,  $\text{CDCl}_3$ , 126 MHz

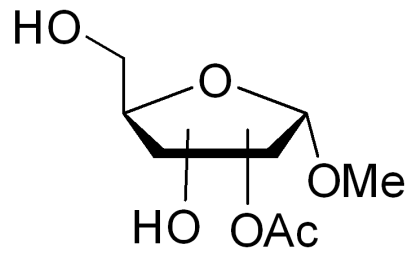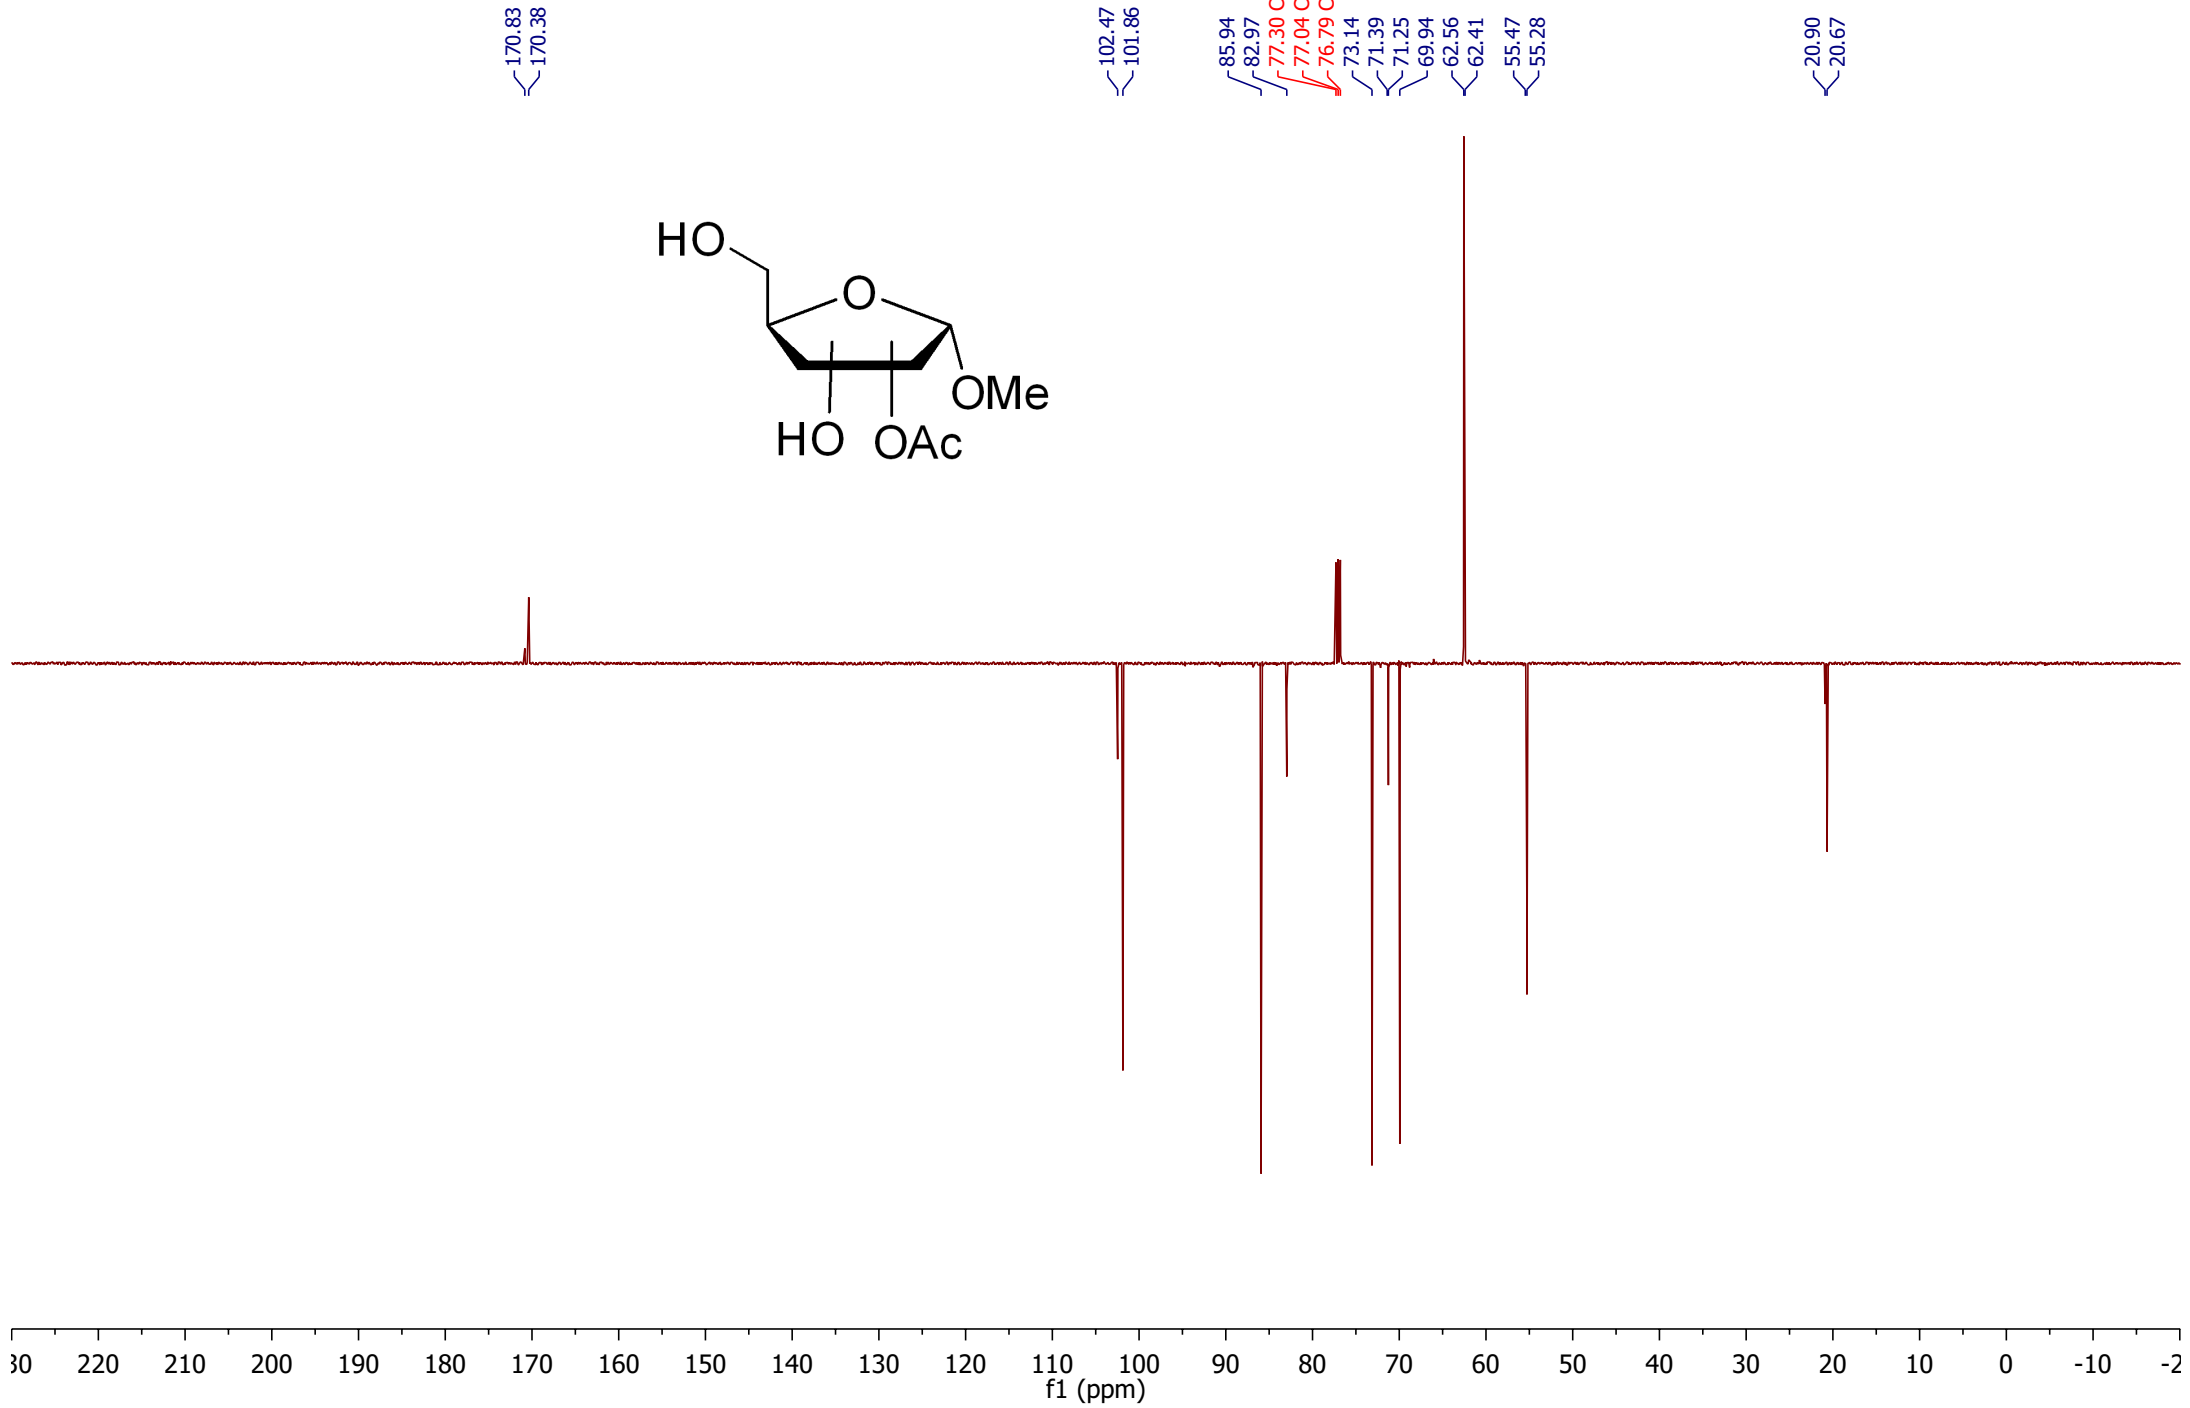

Compound **8**, <sup>1</sup>H-NMR, CDCl<sub>3</sub>, 400 MHz

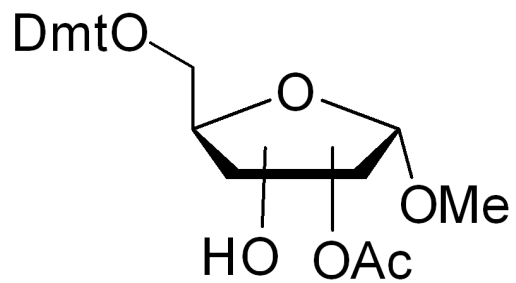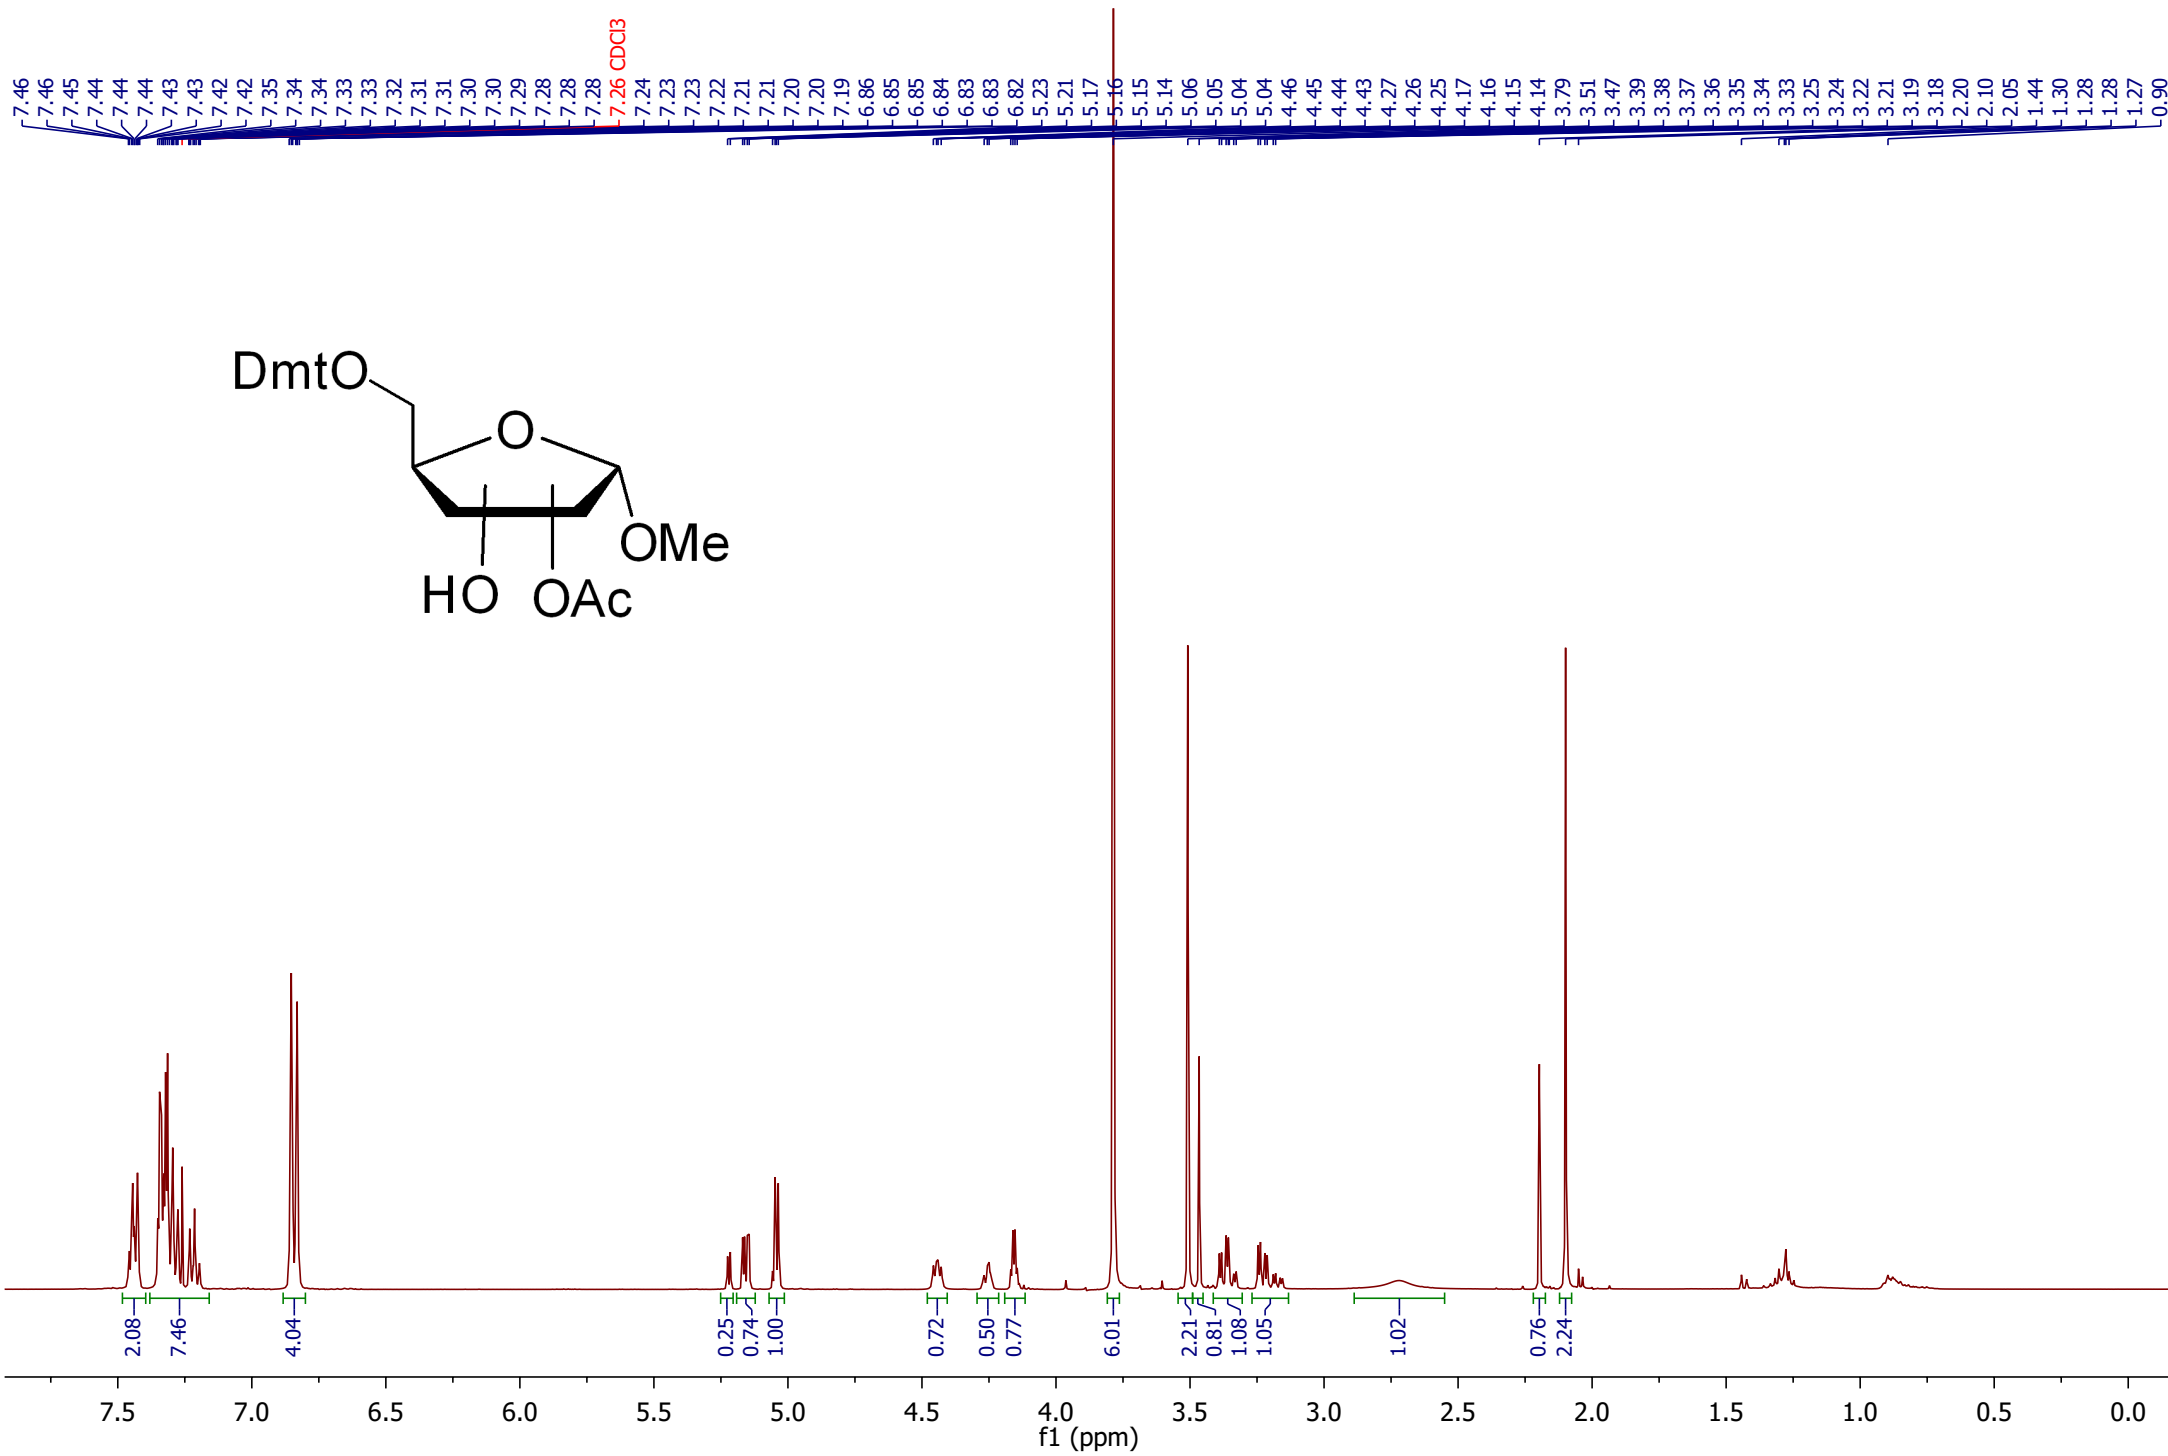

Compound **8**,  $^{13}\text{C}$ -NMR,  $\text{CDCl}_3$ , 101 MHz

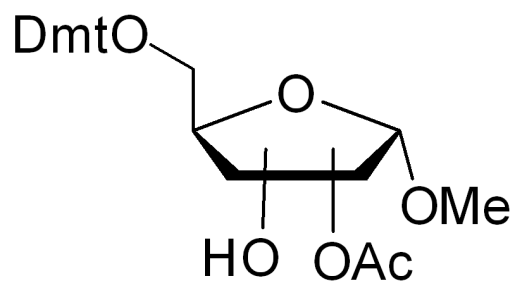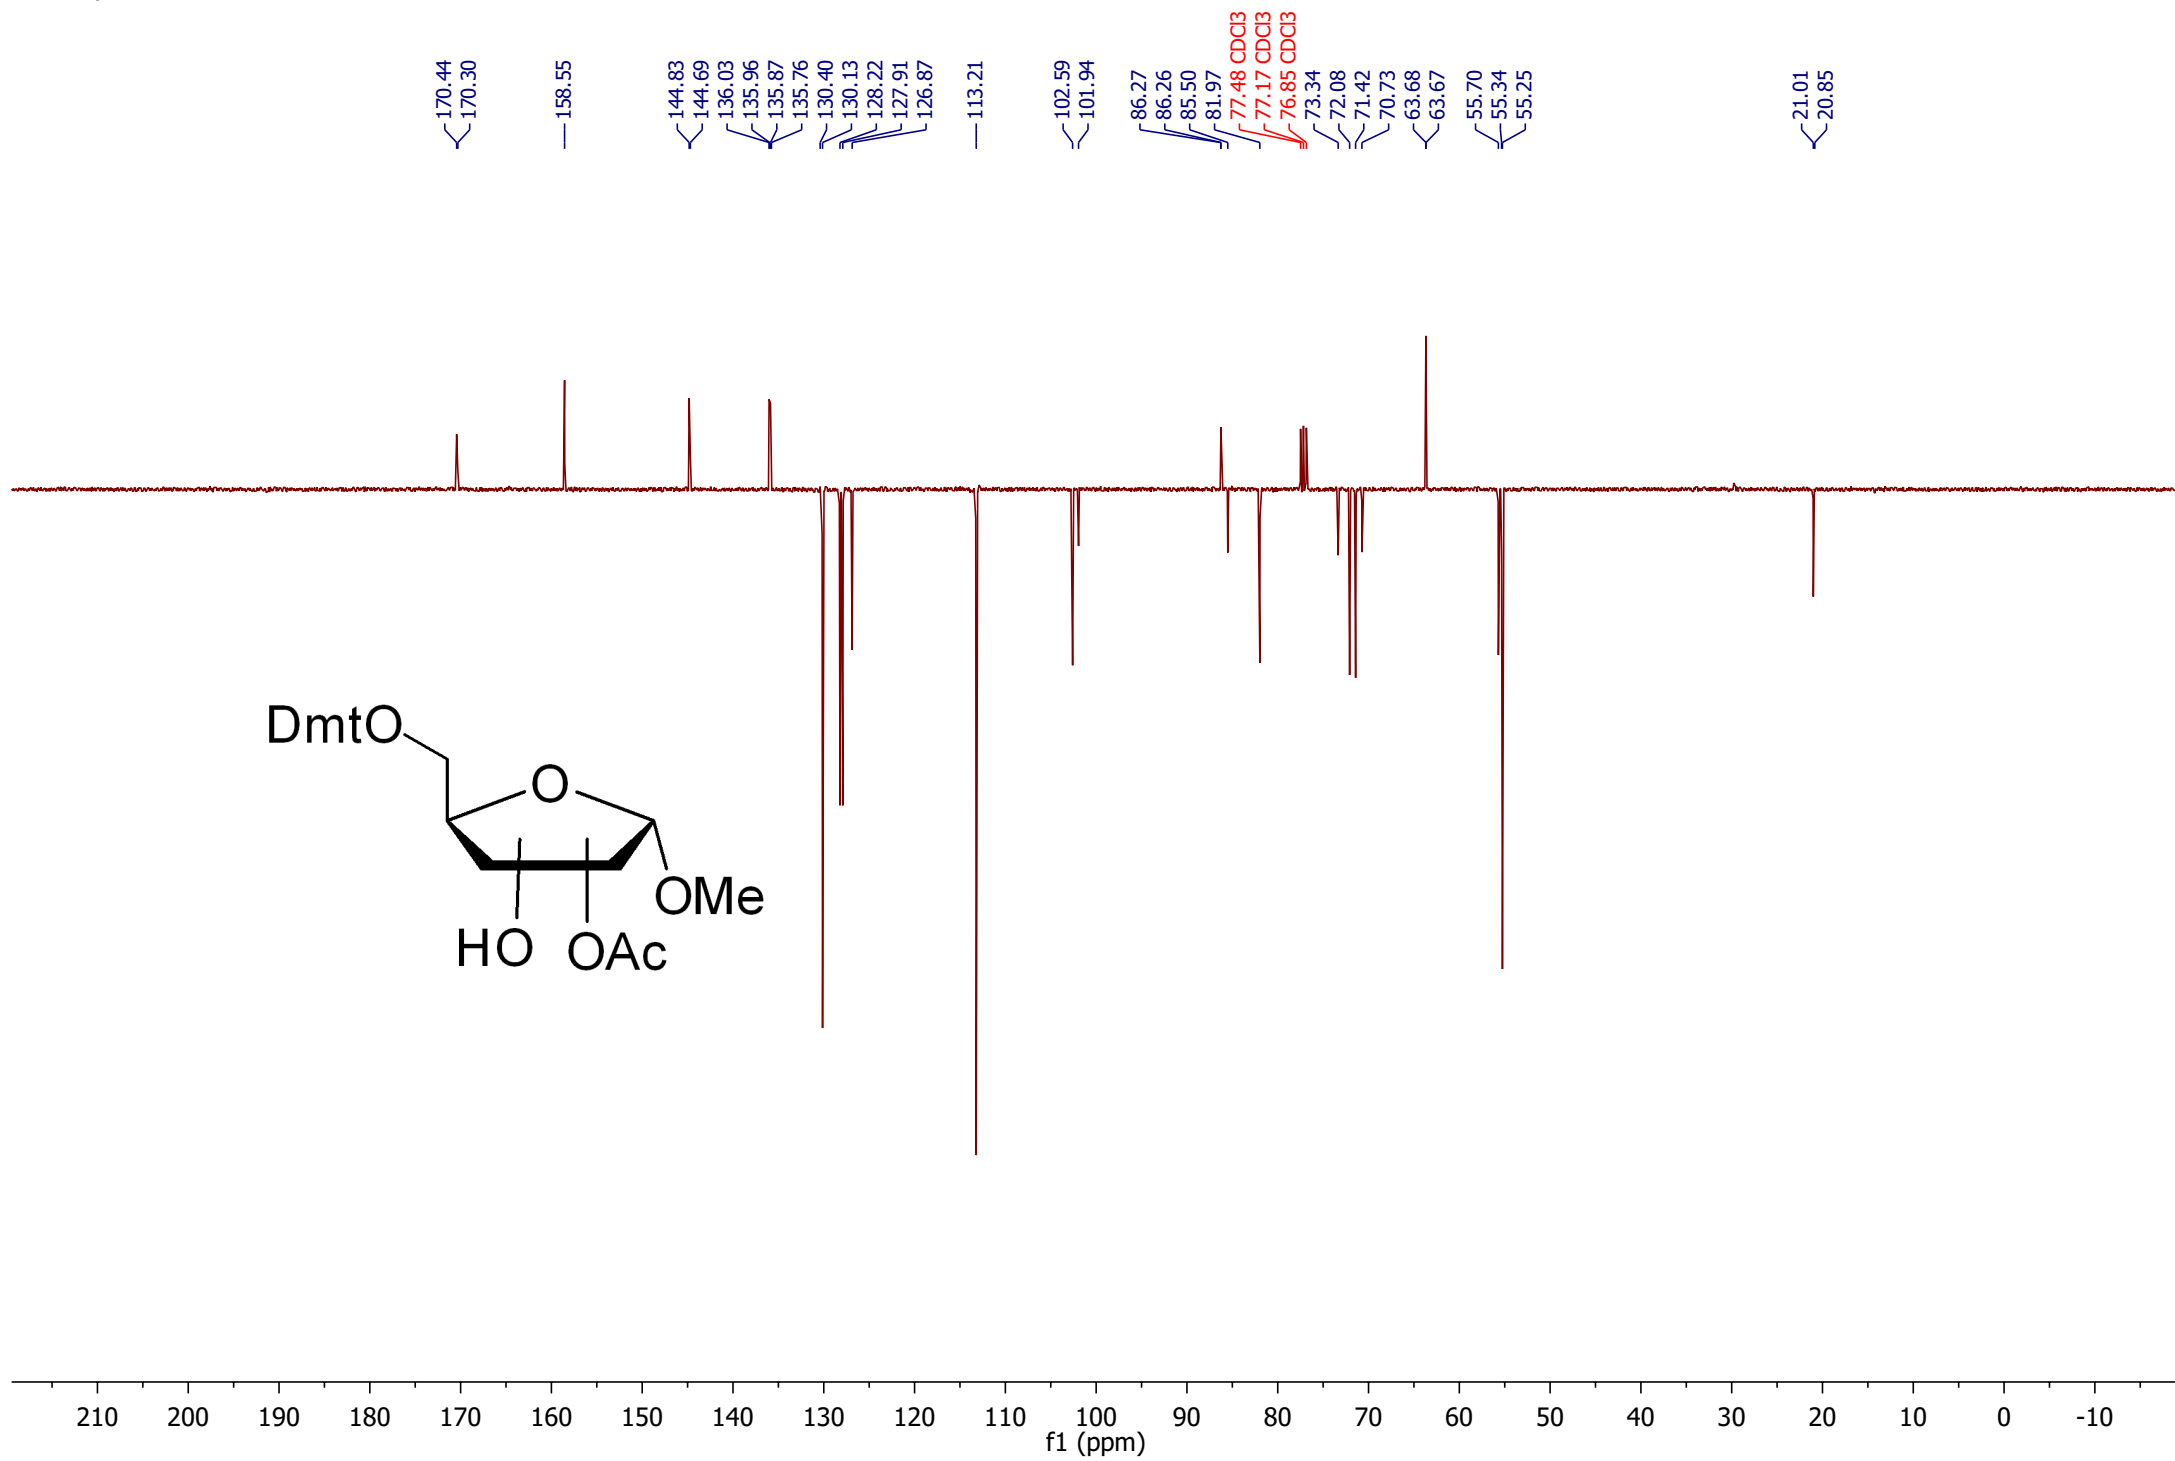



Compound 10, <sup>1</sup>H-NMR, CDCl<sub>3</sub>, 500 MHz

7.42 7.42 7.41 7.41 7.40 7.32 7.31 7.31 7.30 7.30 7.30 7.29 7.28 7.26 7.26 7.22 7.22 7.21 7.20 7.19 7.18 7.18 6.90 6.89 6.88 6.87 6.86 6.85 6.85 6.84 6.83 6.83 6.83 6.81 6.81 6.81 6.81 6.81 5.42 5.41 5.33 5.32 5.31 5.31 5.31 5.27 5.26 5.26 5.25 5.25 5.21 5.21 4.67 4.64 4.64 4.62 4.62 4.61 4.59 4.58 4.46 4.44 4.22 4.22 4.21 4.21 4.20 3.78 3.78 3.45 3.44 3.39 3.39 3.38 3.38 3.36 3.36 3.24 3.23 3.23 3.21 3.21 3.09 3.07 3.06 3.05 2.07 2.04

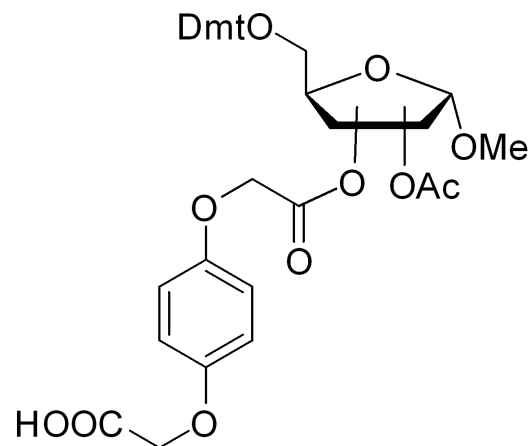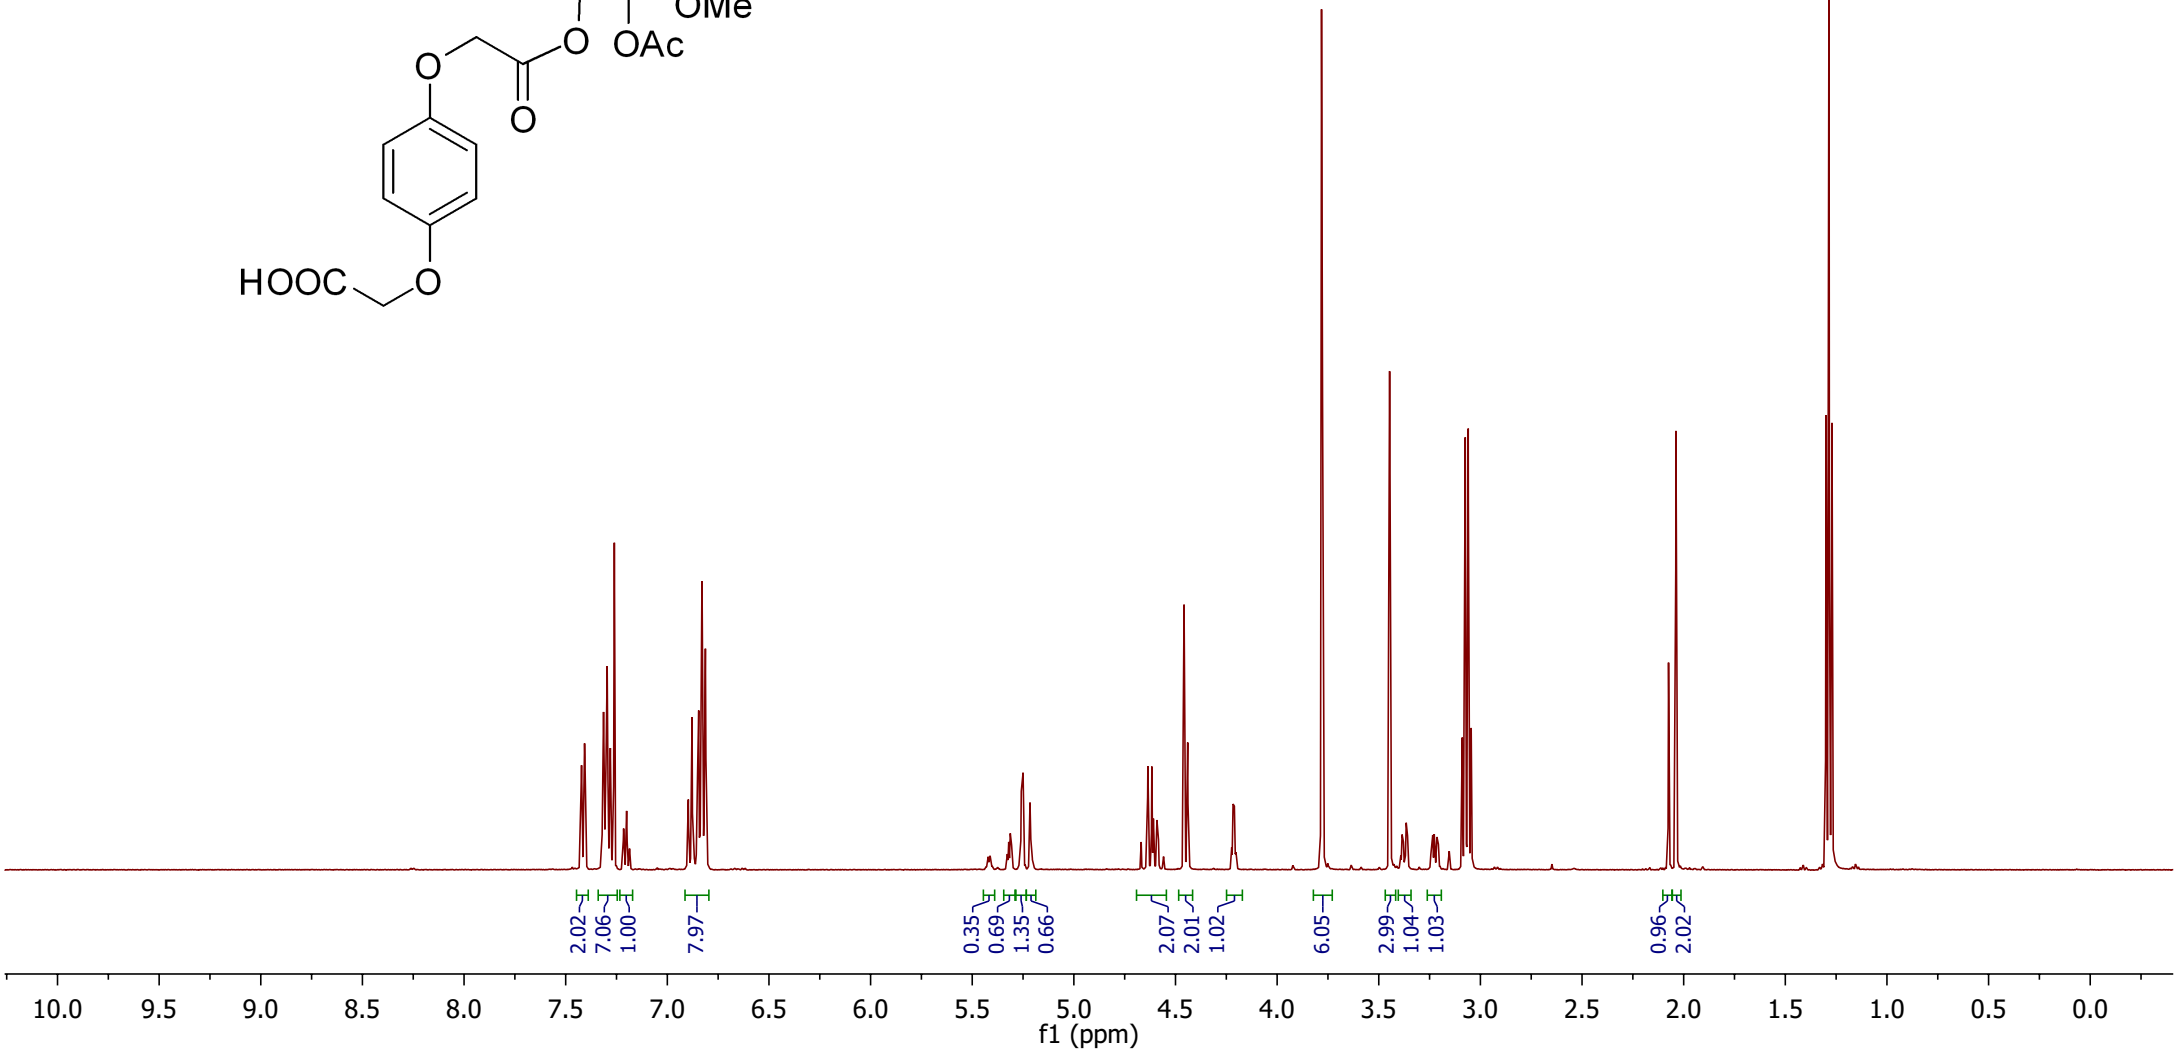

Compound **10**,  $^{13}\text{C}$ -NMR,  $\text{CDCl}_3$ , 126 MHz

174.15  
174.14  
170.34  
169.88  
168.67  
168.30

158.52  
158.50  
153.69  
152.00  
151.98

144.60

135.85  
135.81  
135.70  
135.63  
130.06  
130.04  
128.14  
127.86  
126.84  
126.82

115.85  
115.76  
115.56  
113.16

101.51  
101.49

86.33  
86.28

81.06  
80.88

71.64  
71.49  
71.27  
70.45

67.47  
66.10  
65.90

63.30  
63.27

55.73  
55.62  
55.21

20.79  
20.60

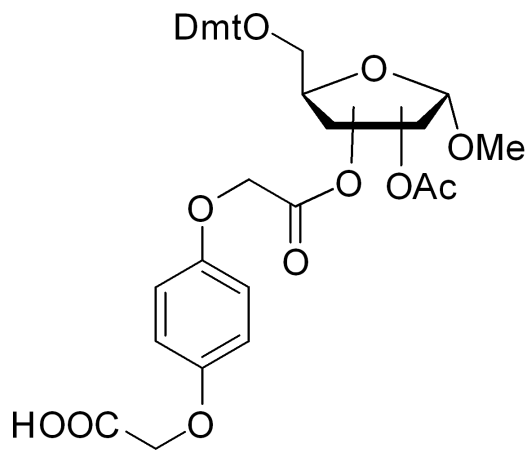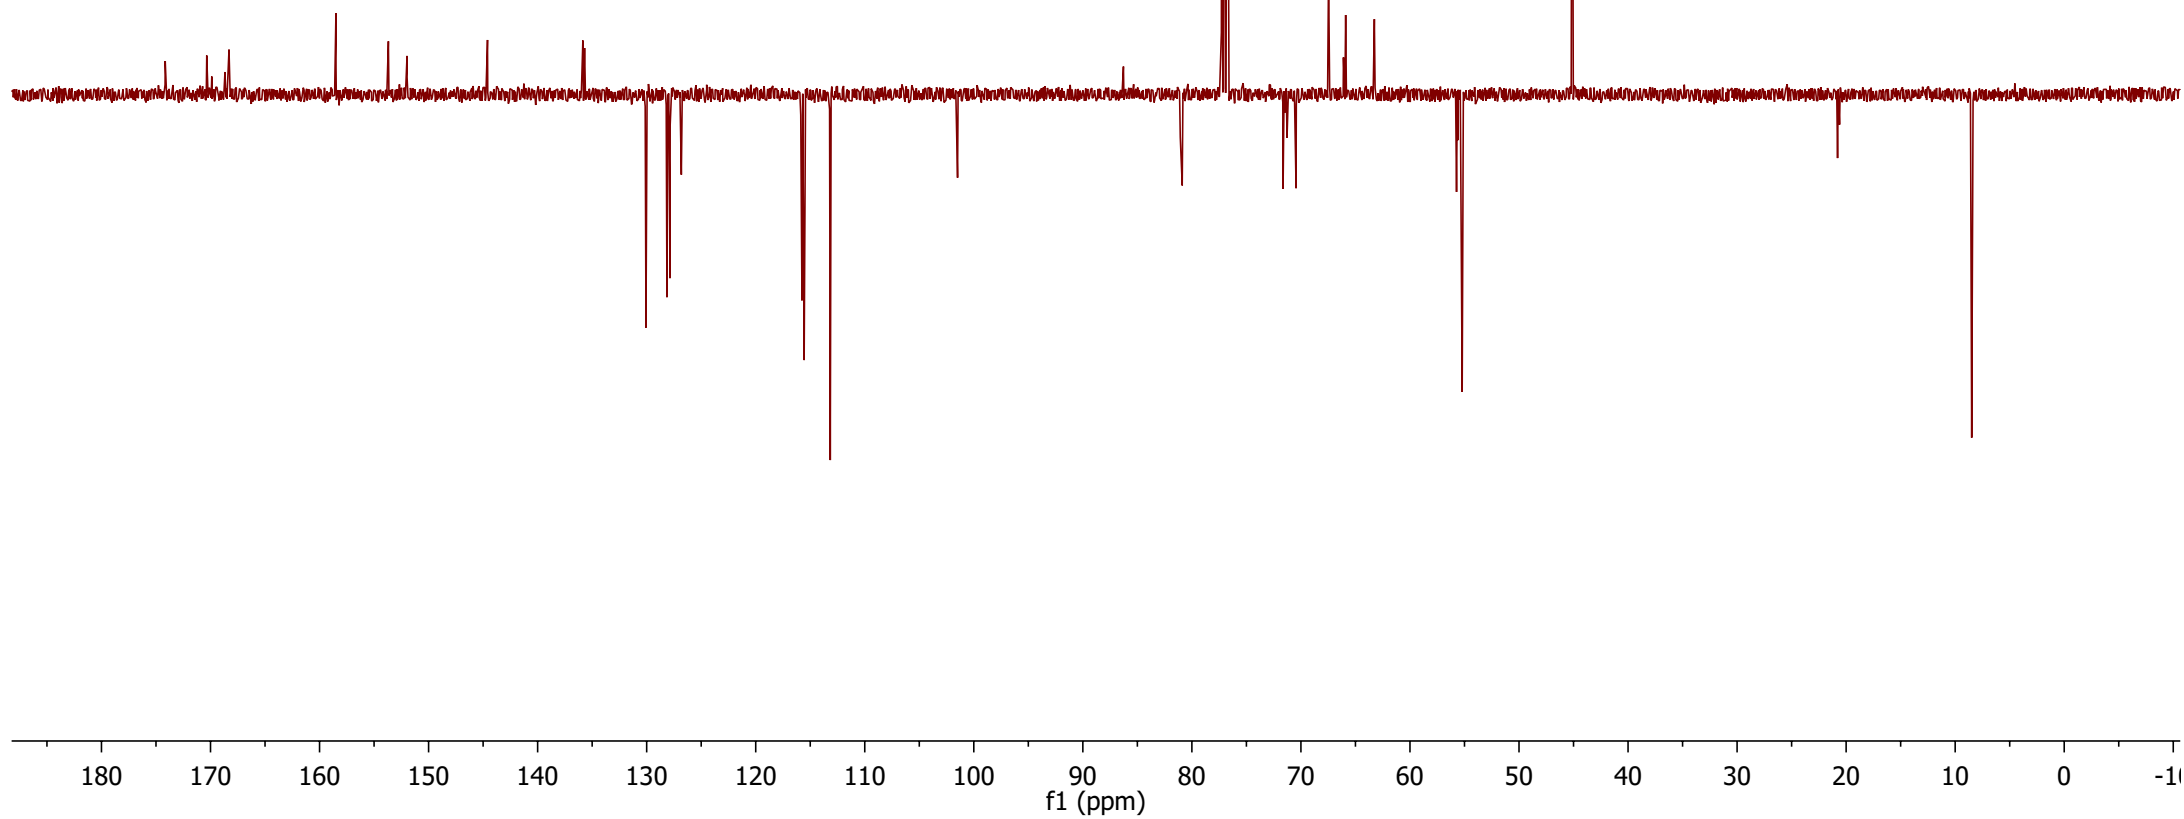

Compound **2m** (deprotected),  $^{31}\text{P}$ -NMR,  $\text{D}_2\text{O}$ , 162 MHz

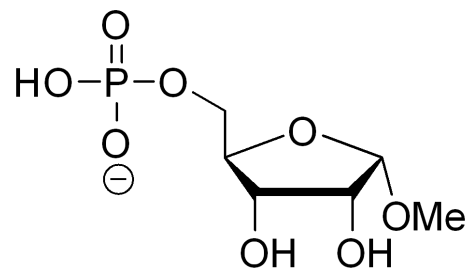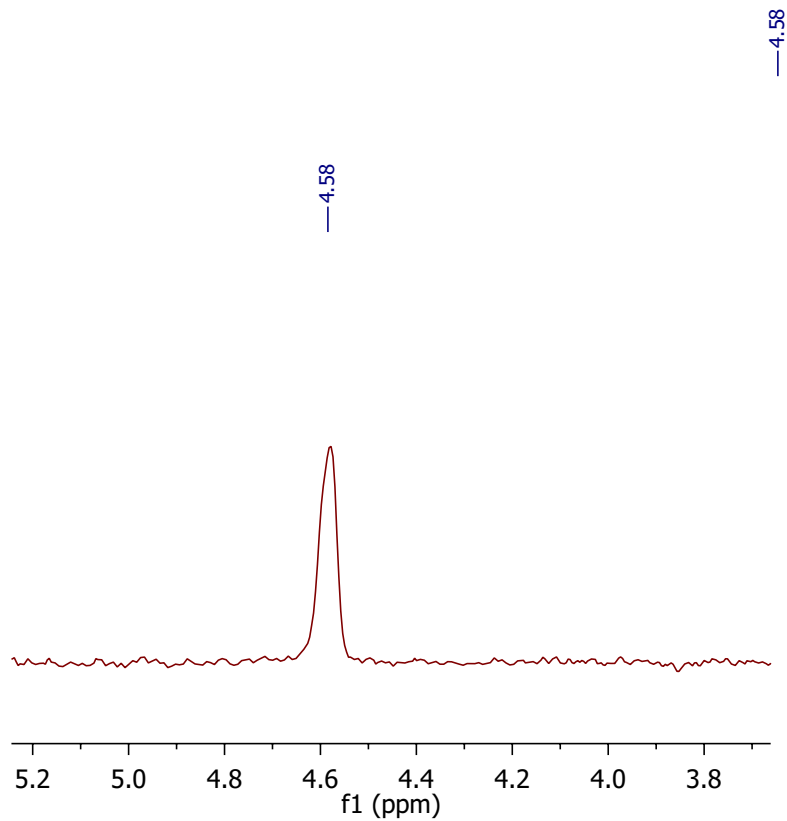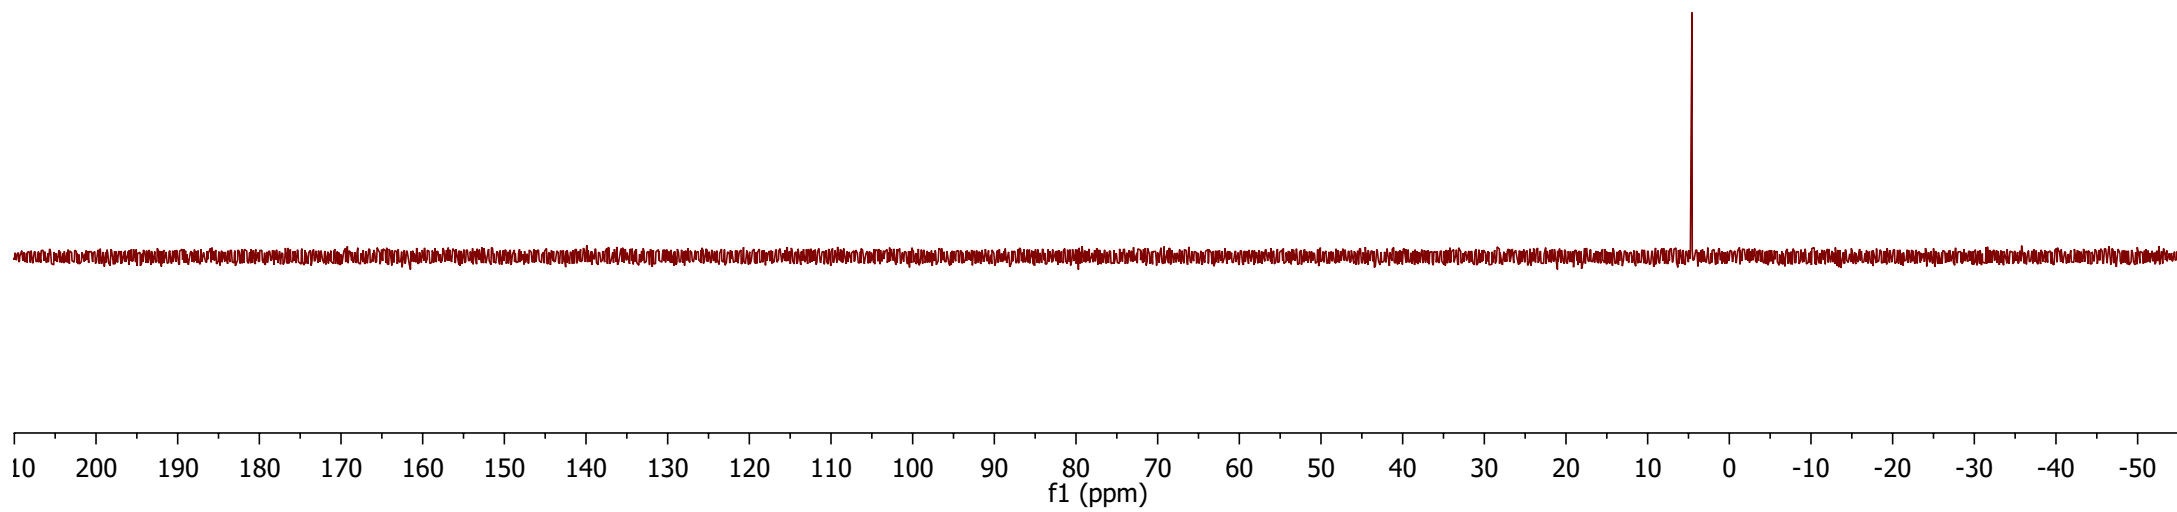

Compound **2k** (deprotected),  $^{31}\text{P}$ -NMR,  $\text{D}_2\text{O}$ , 162 MHz

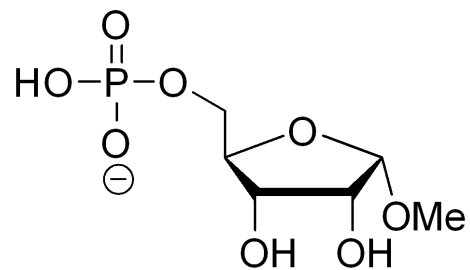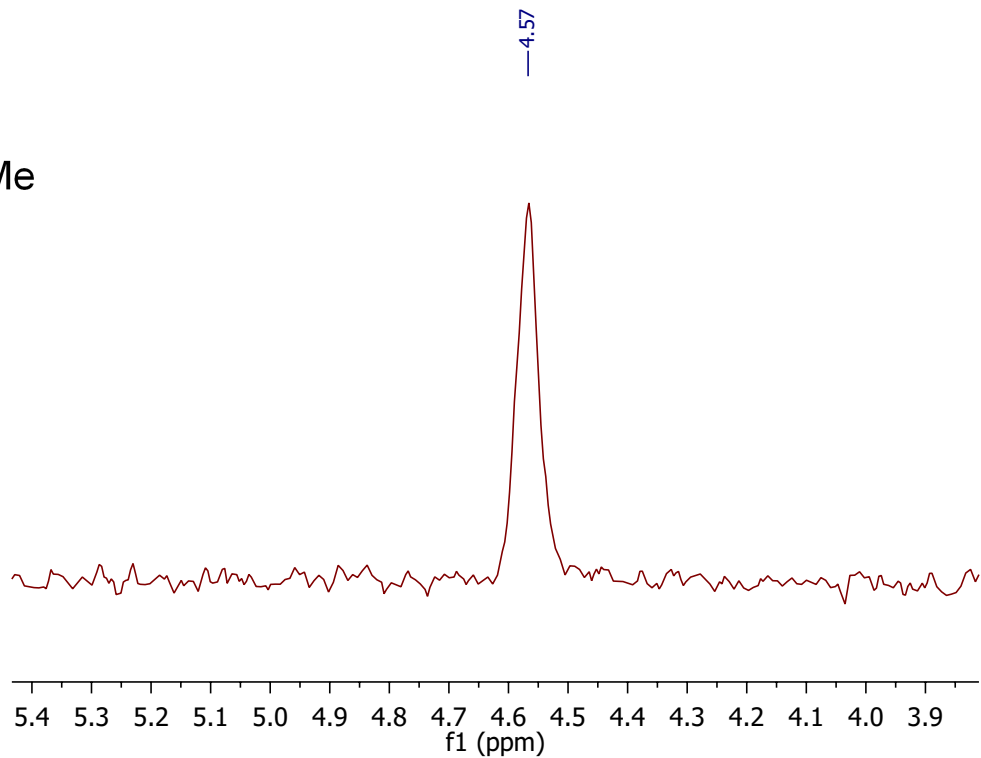

4.57

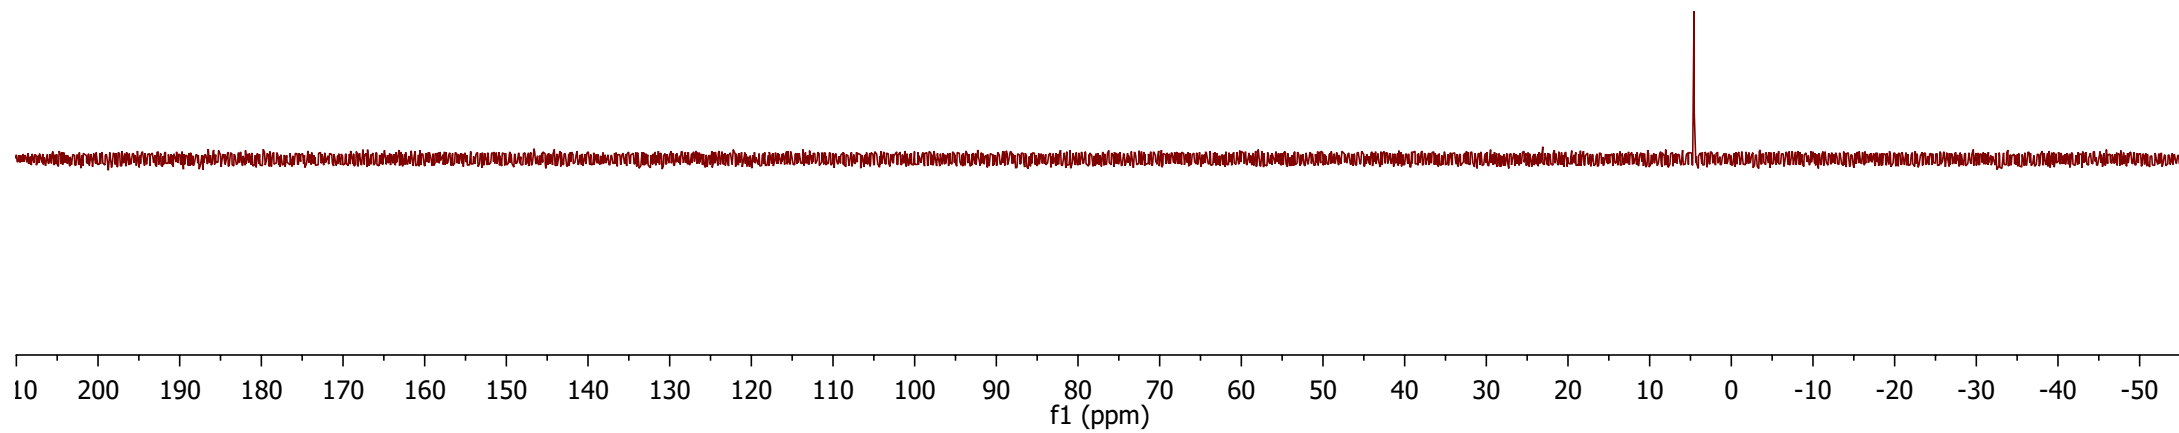

Compound **15**,  $^1\text{H-NMR}$ ,  $\text{CDCl}_3$ , 500 MHz

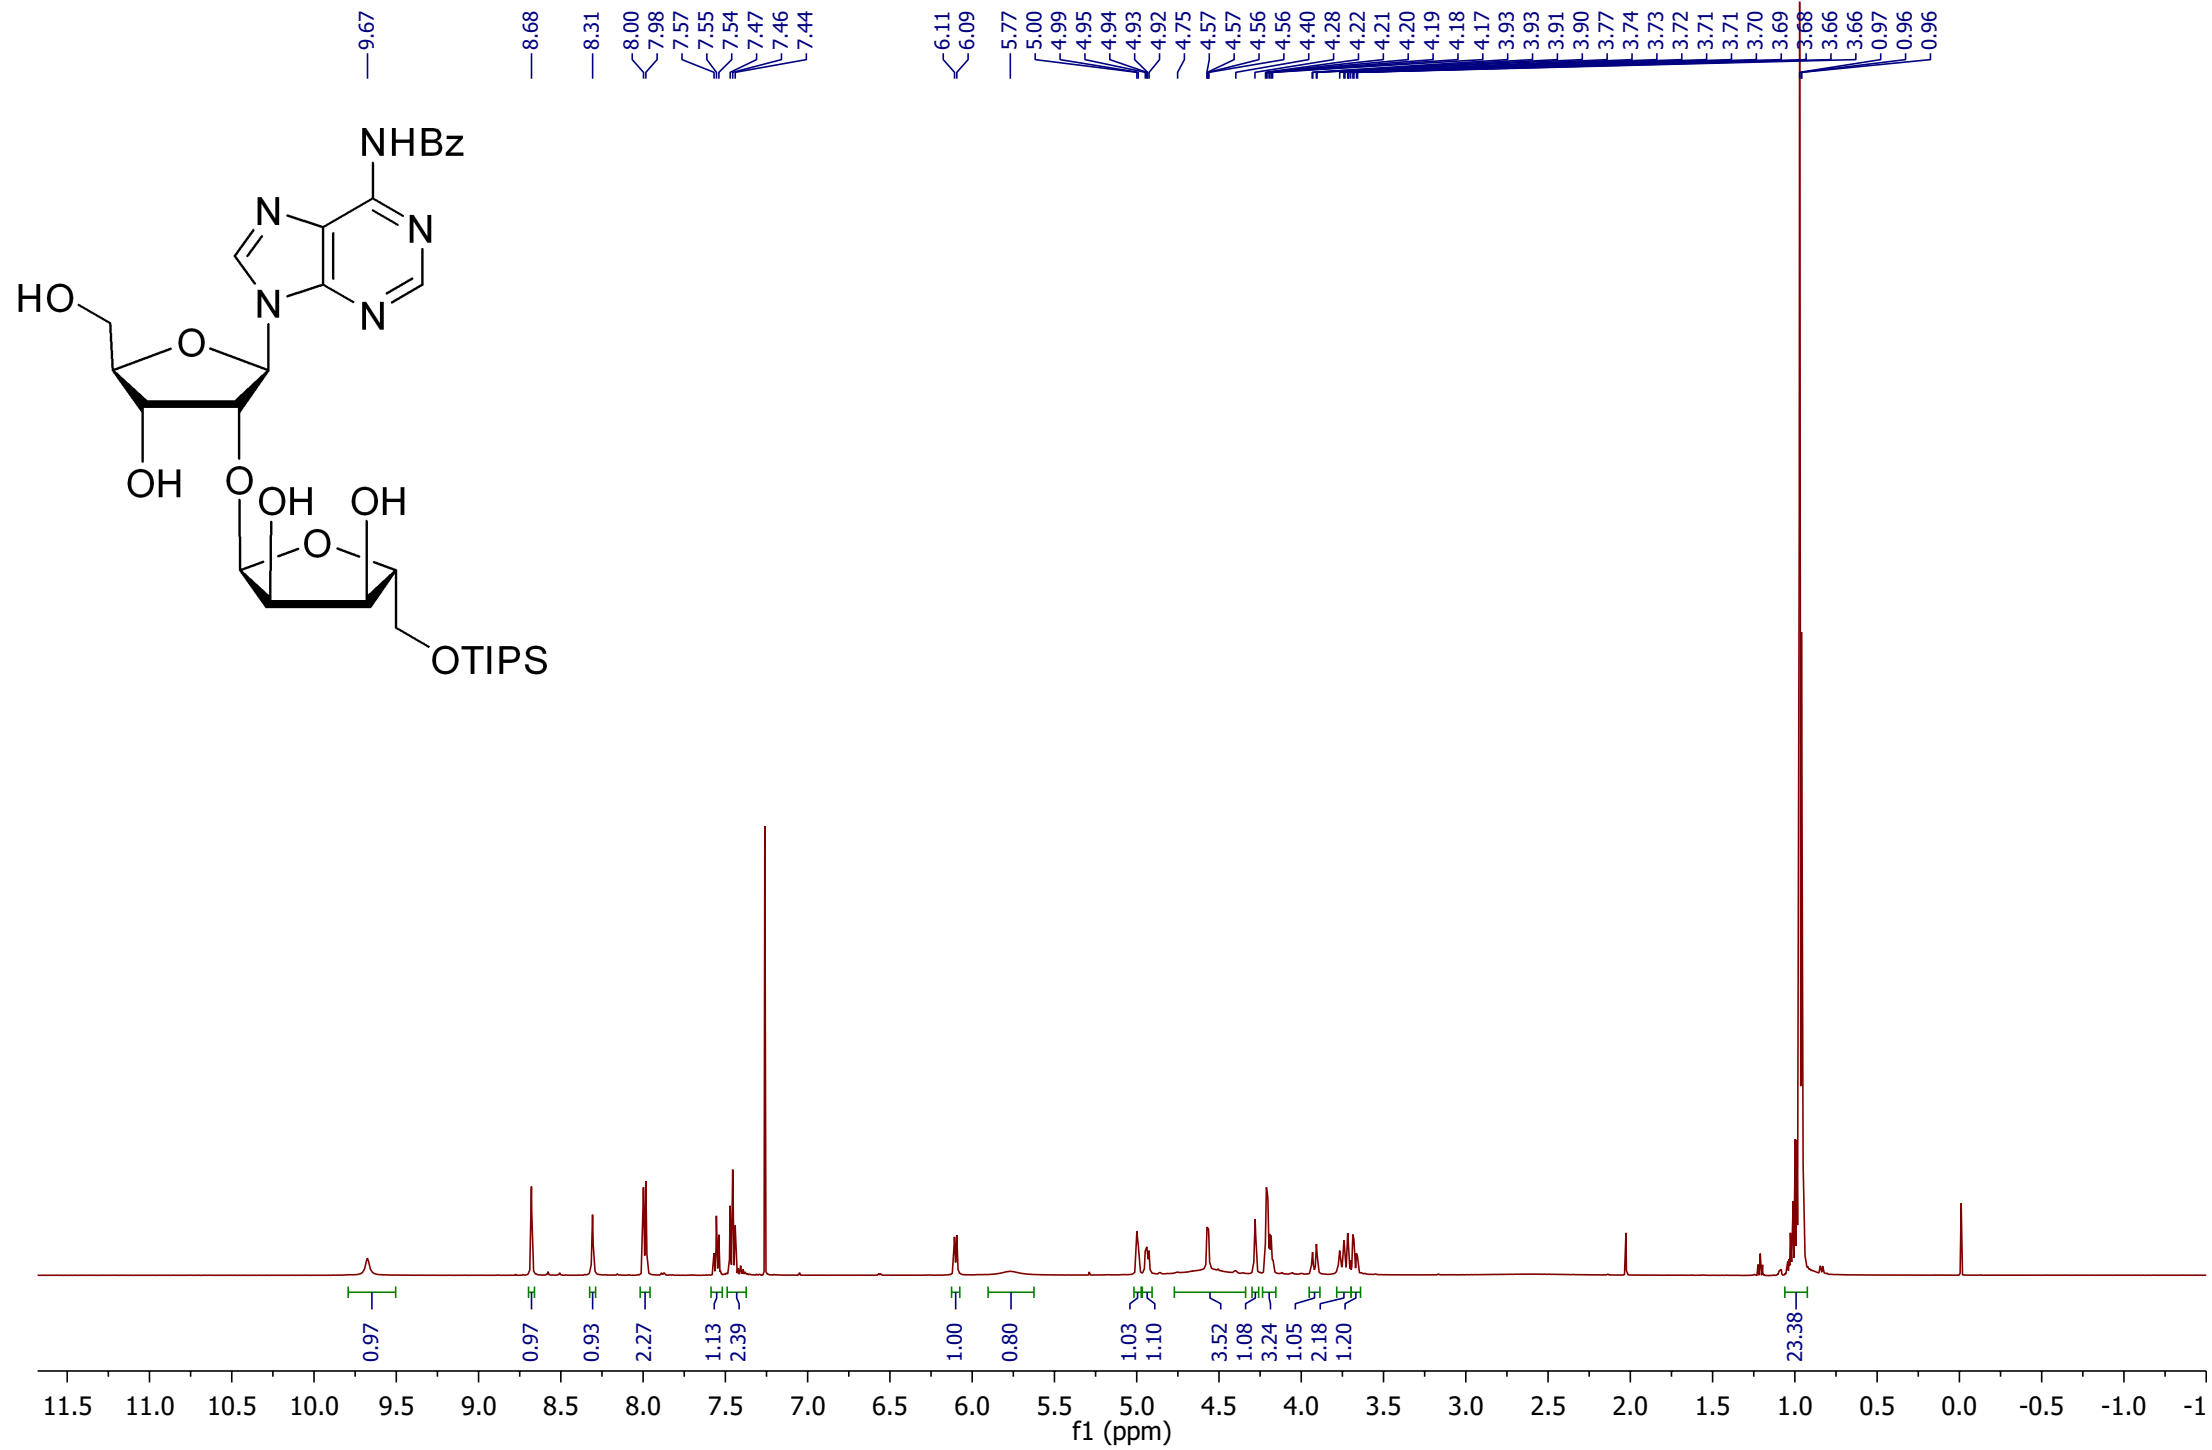

Compound **15**,  $^{13}\text{C}$ -NMR,  $\text{CDCl}_3$ , 126 MHz

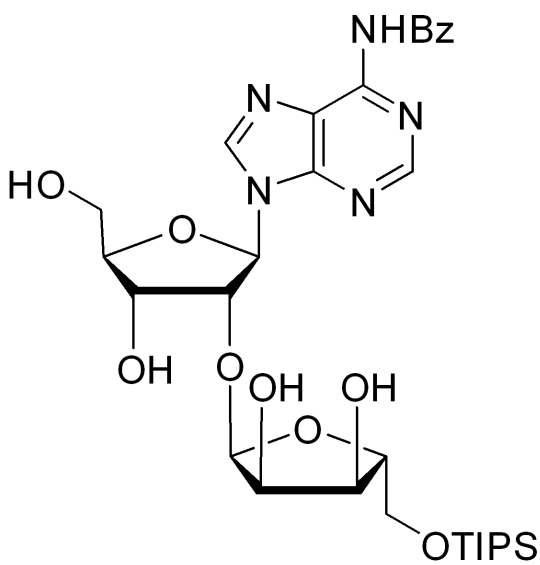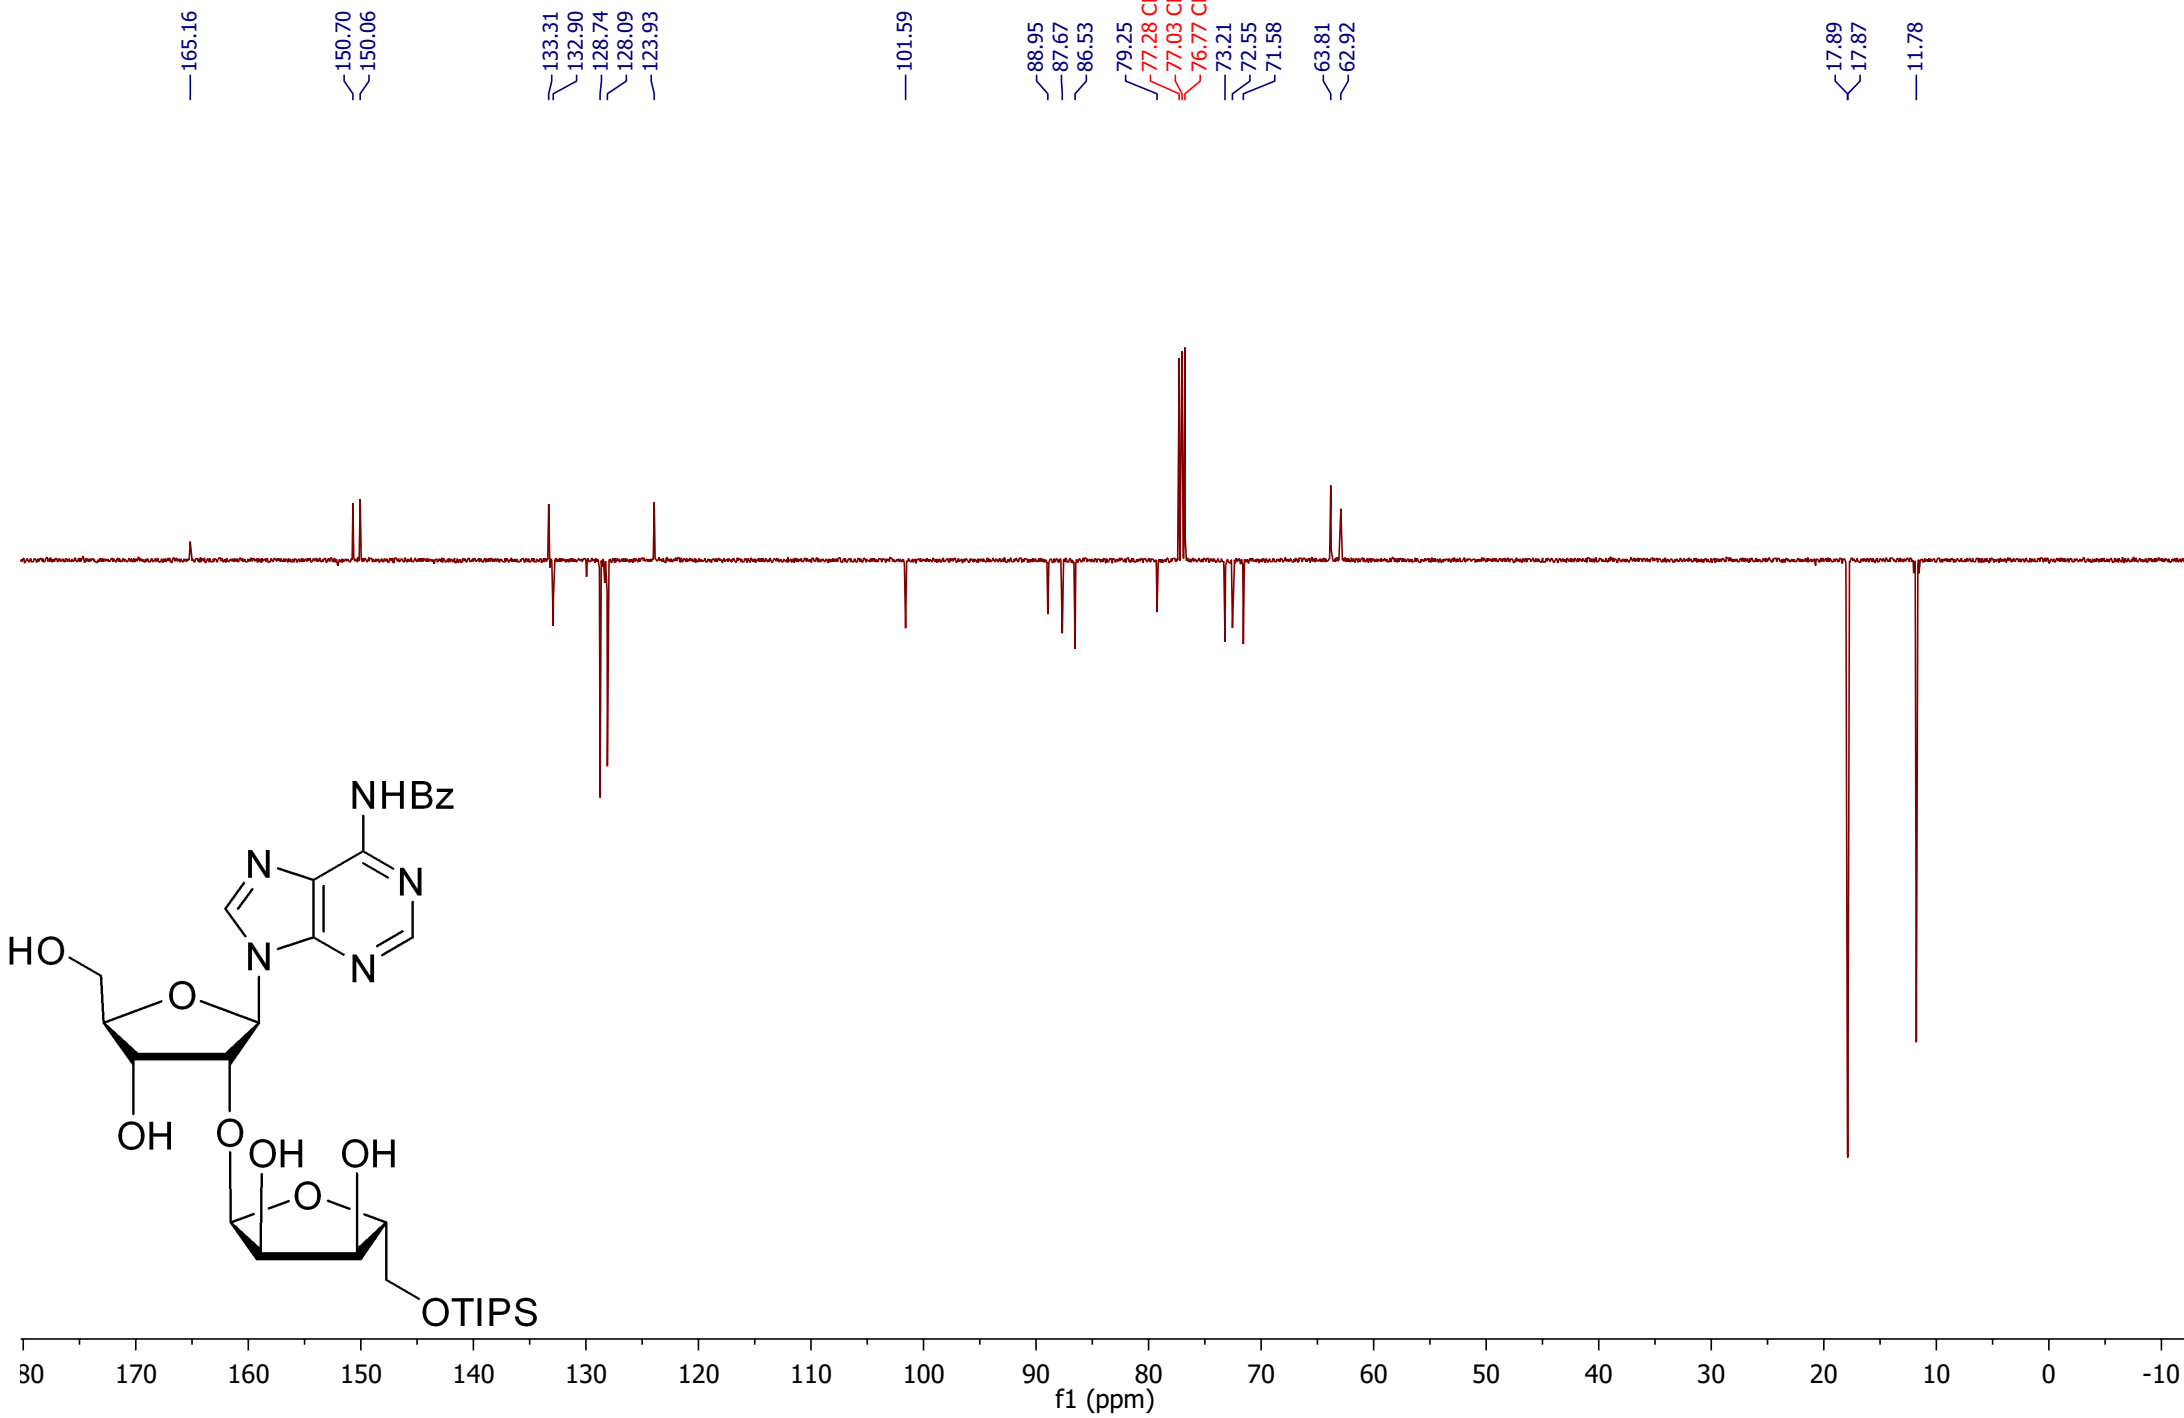

Compound **16**,  $^1\text{H-NMR}$ ,  $\text{CDCl}_3$ , 500 MHz

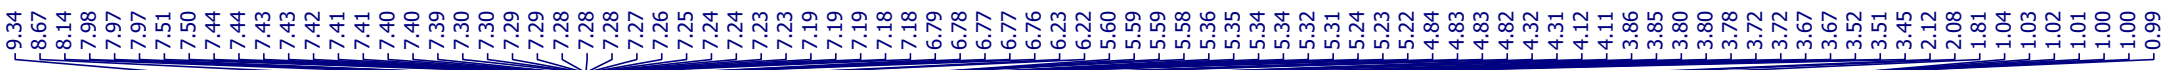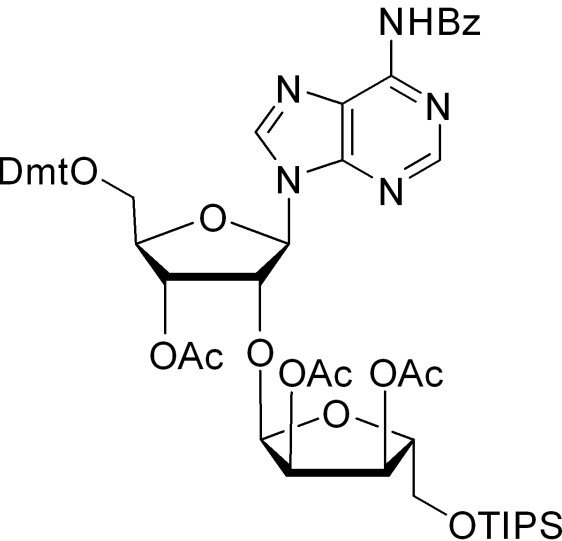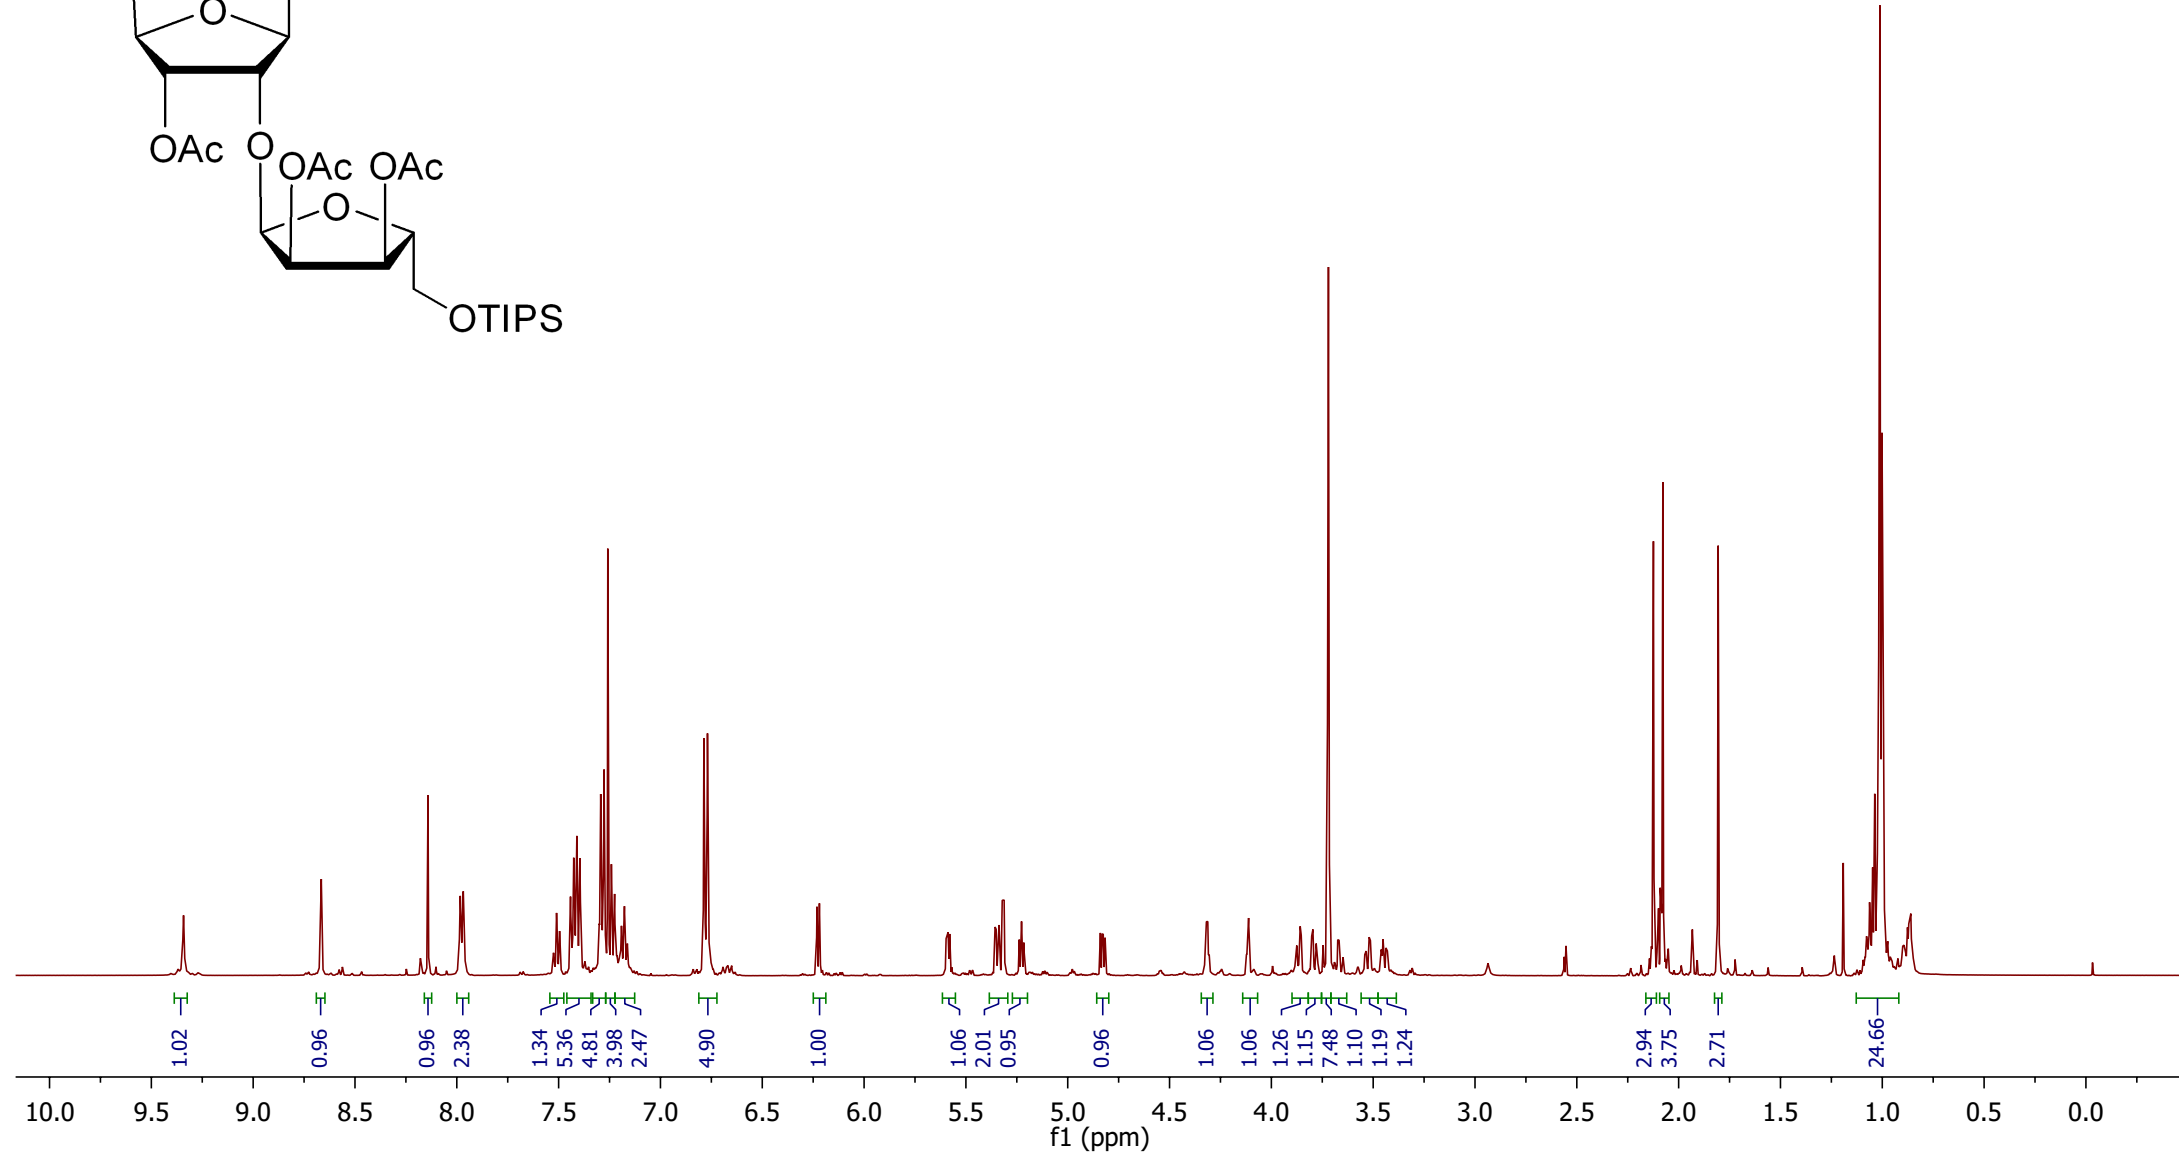

Compound **16**,  $^{13}\text{C}$ -NMR,  $\text{CDCl}_3$ , 126 MHz

170.20  
169.56  
169.47  
164.72  
158.64  
152.75  
151.91  
149.70  
144.33  
141.45  
135.33  
133.66  
132.68  
130.11  
128.75  
128.17  
127.91  
127.89  
127.05  
123.48  
113.22

101.30

86.90  
86.41  
83.31  
82.56  
77.97  
72.27  
71.52  
70.13  
63.17  
62.93  
55.16

20.84  
20.80  
20.17  
17.89  
17.86  
11.83

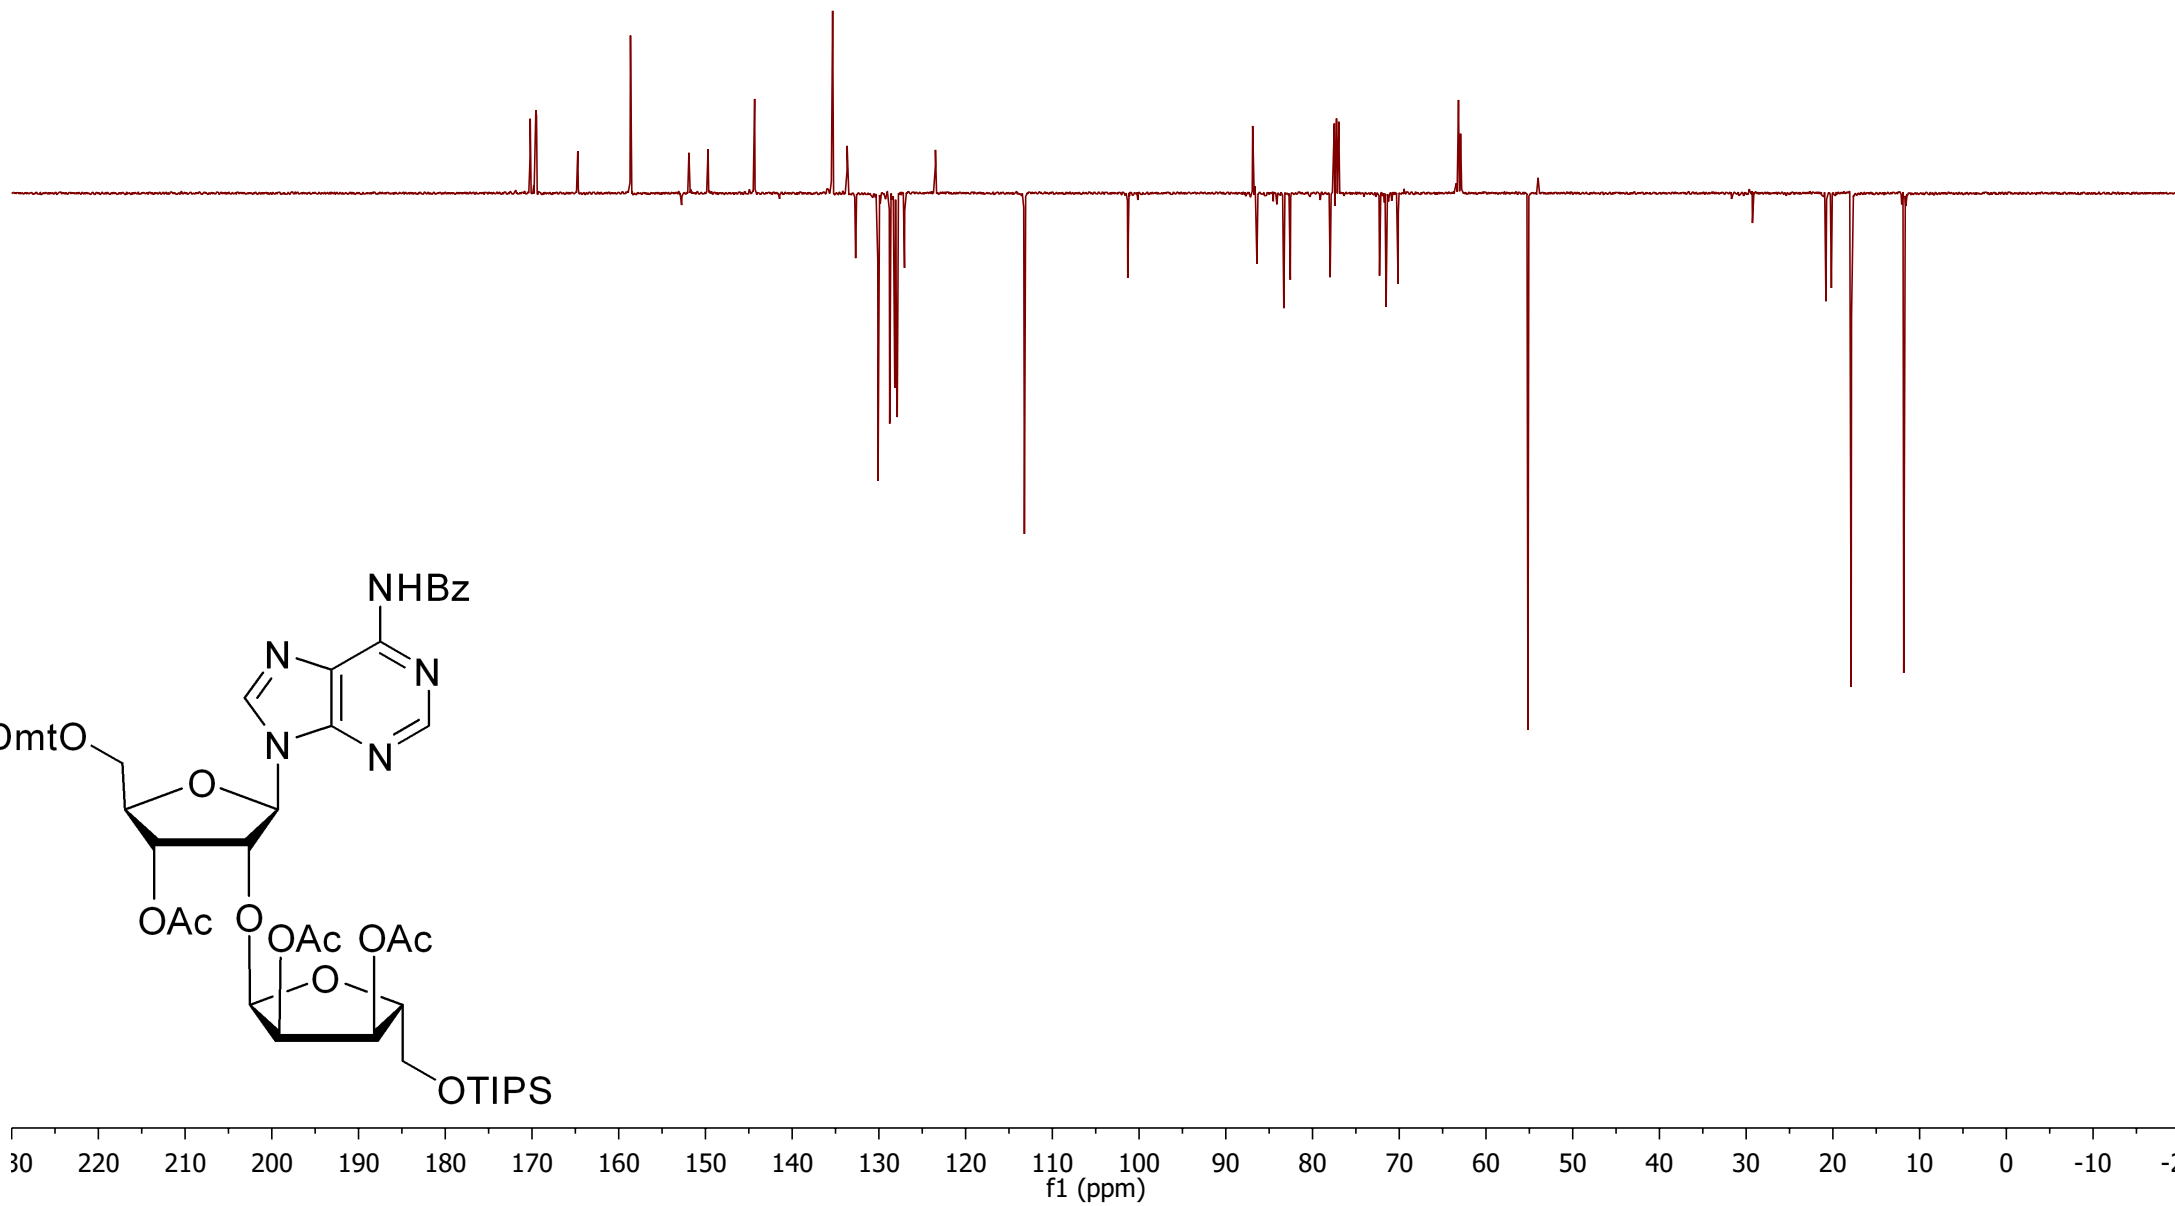



Compound 17, <sup>1</sup>H-NMR, CDCl<sub>3</sub>, 400 MHz

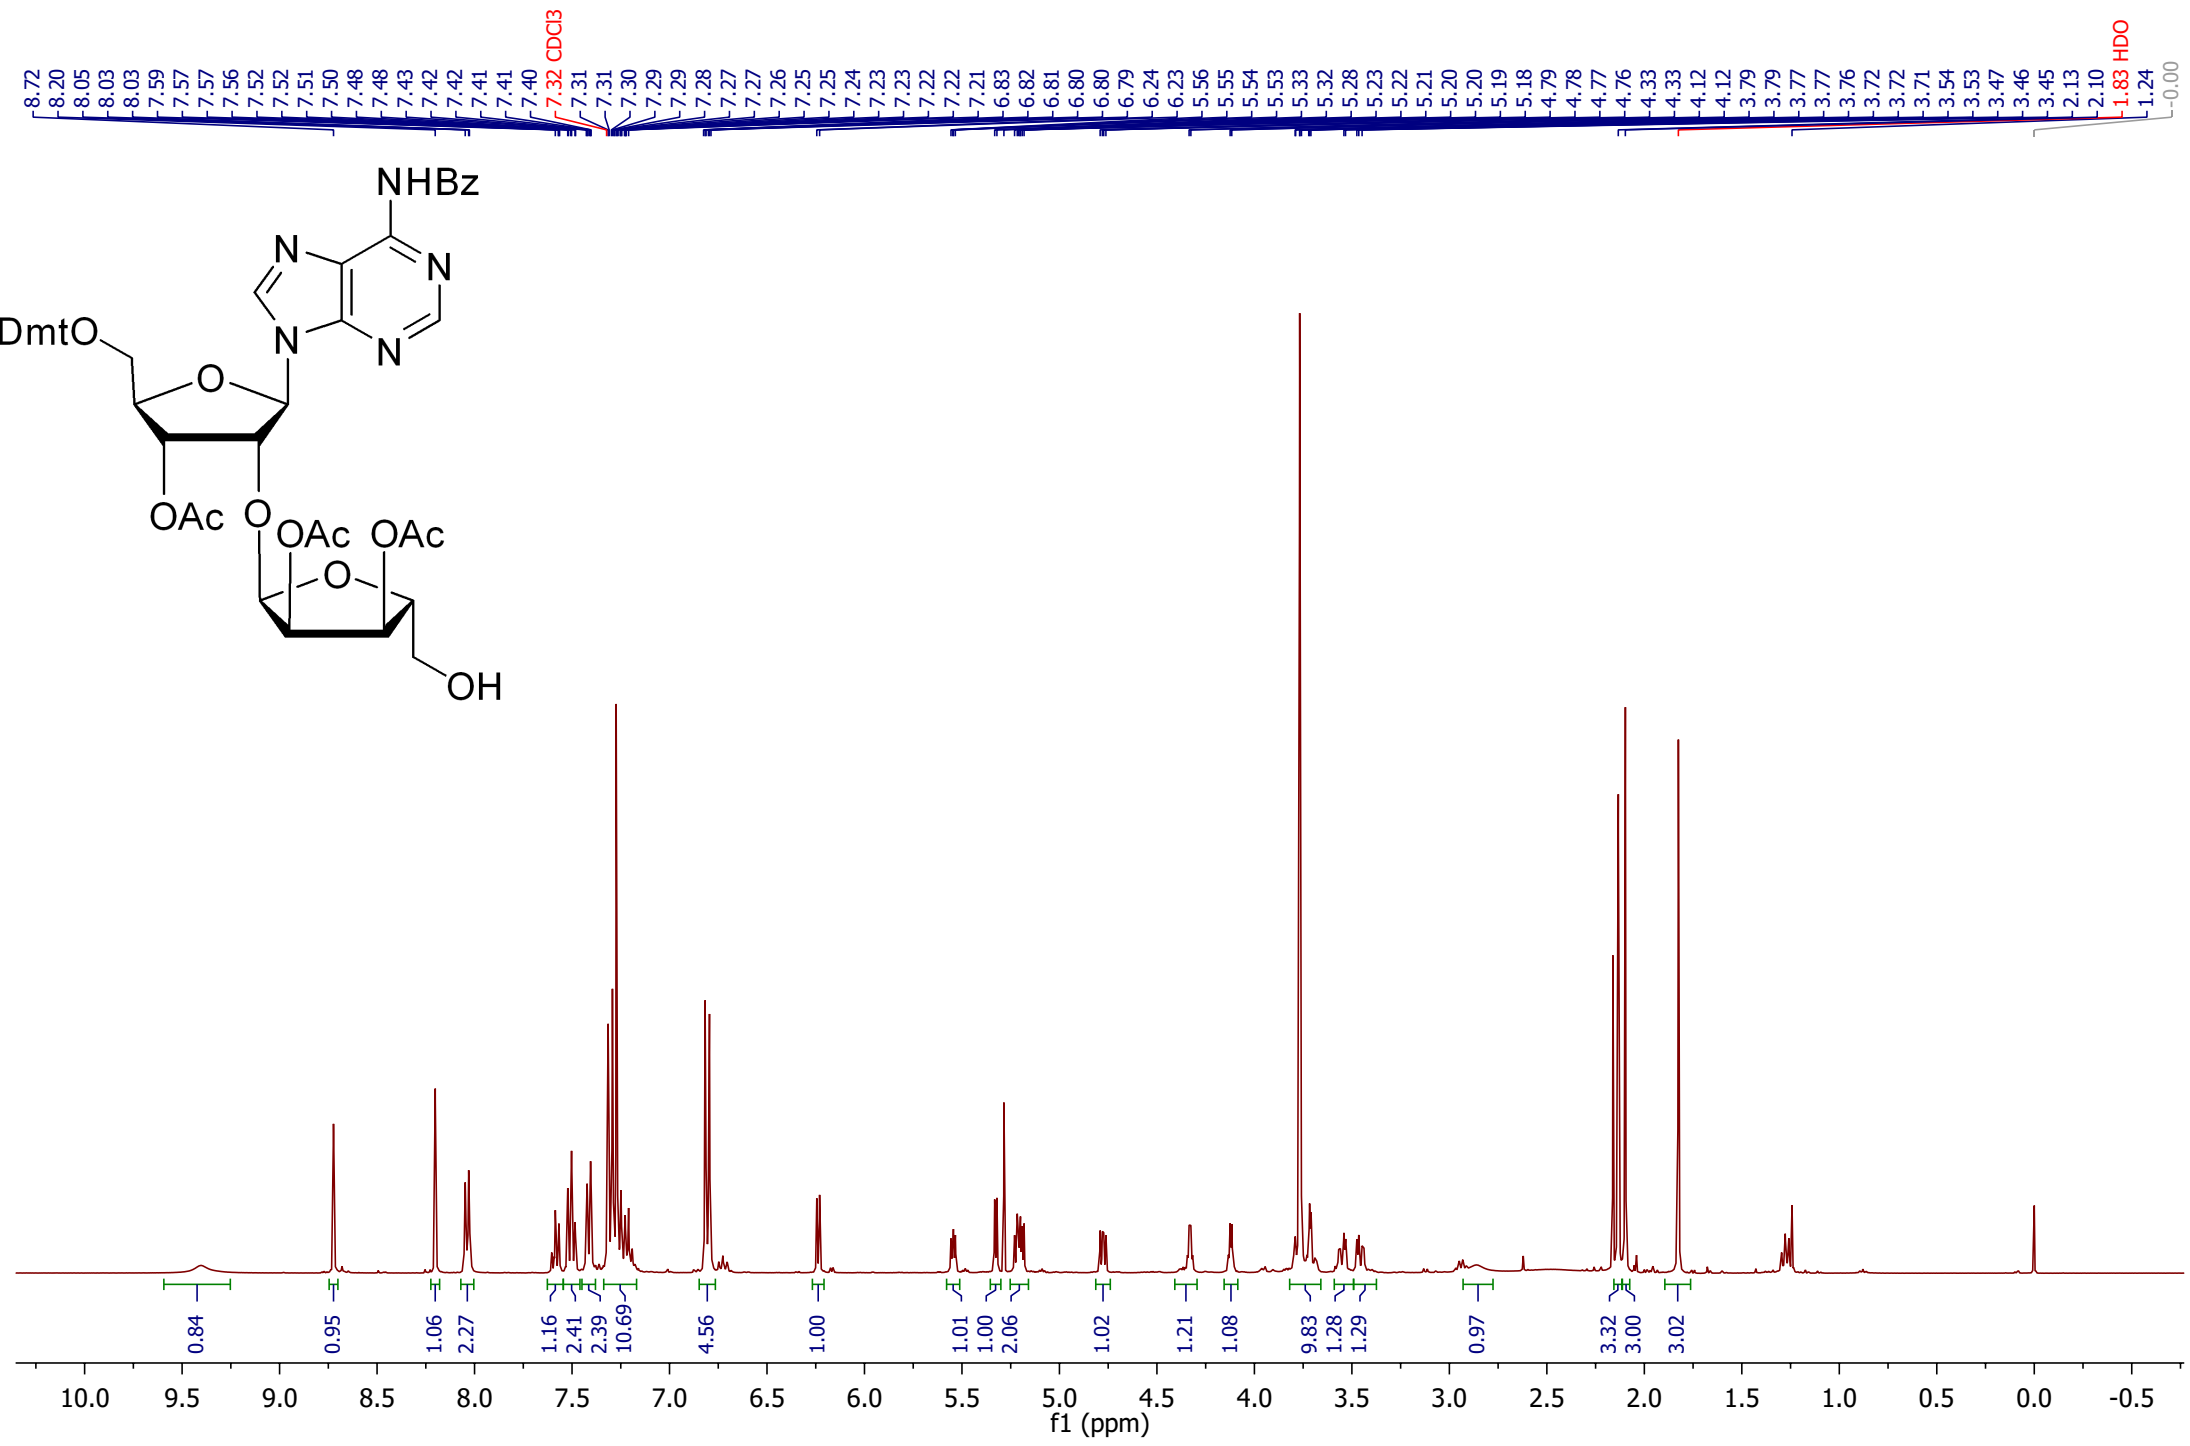

Compound **17**,  $^{13}\text{C}$ -NMR,  $\text{CDCl}_3$ , 101 MHz

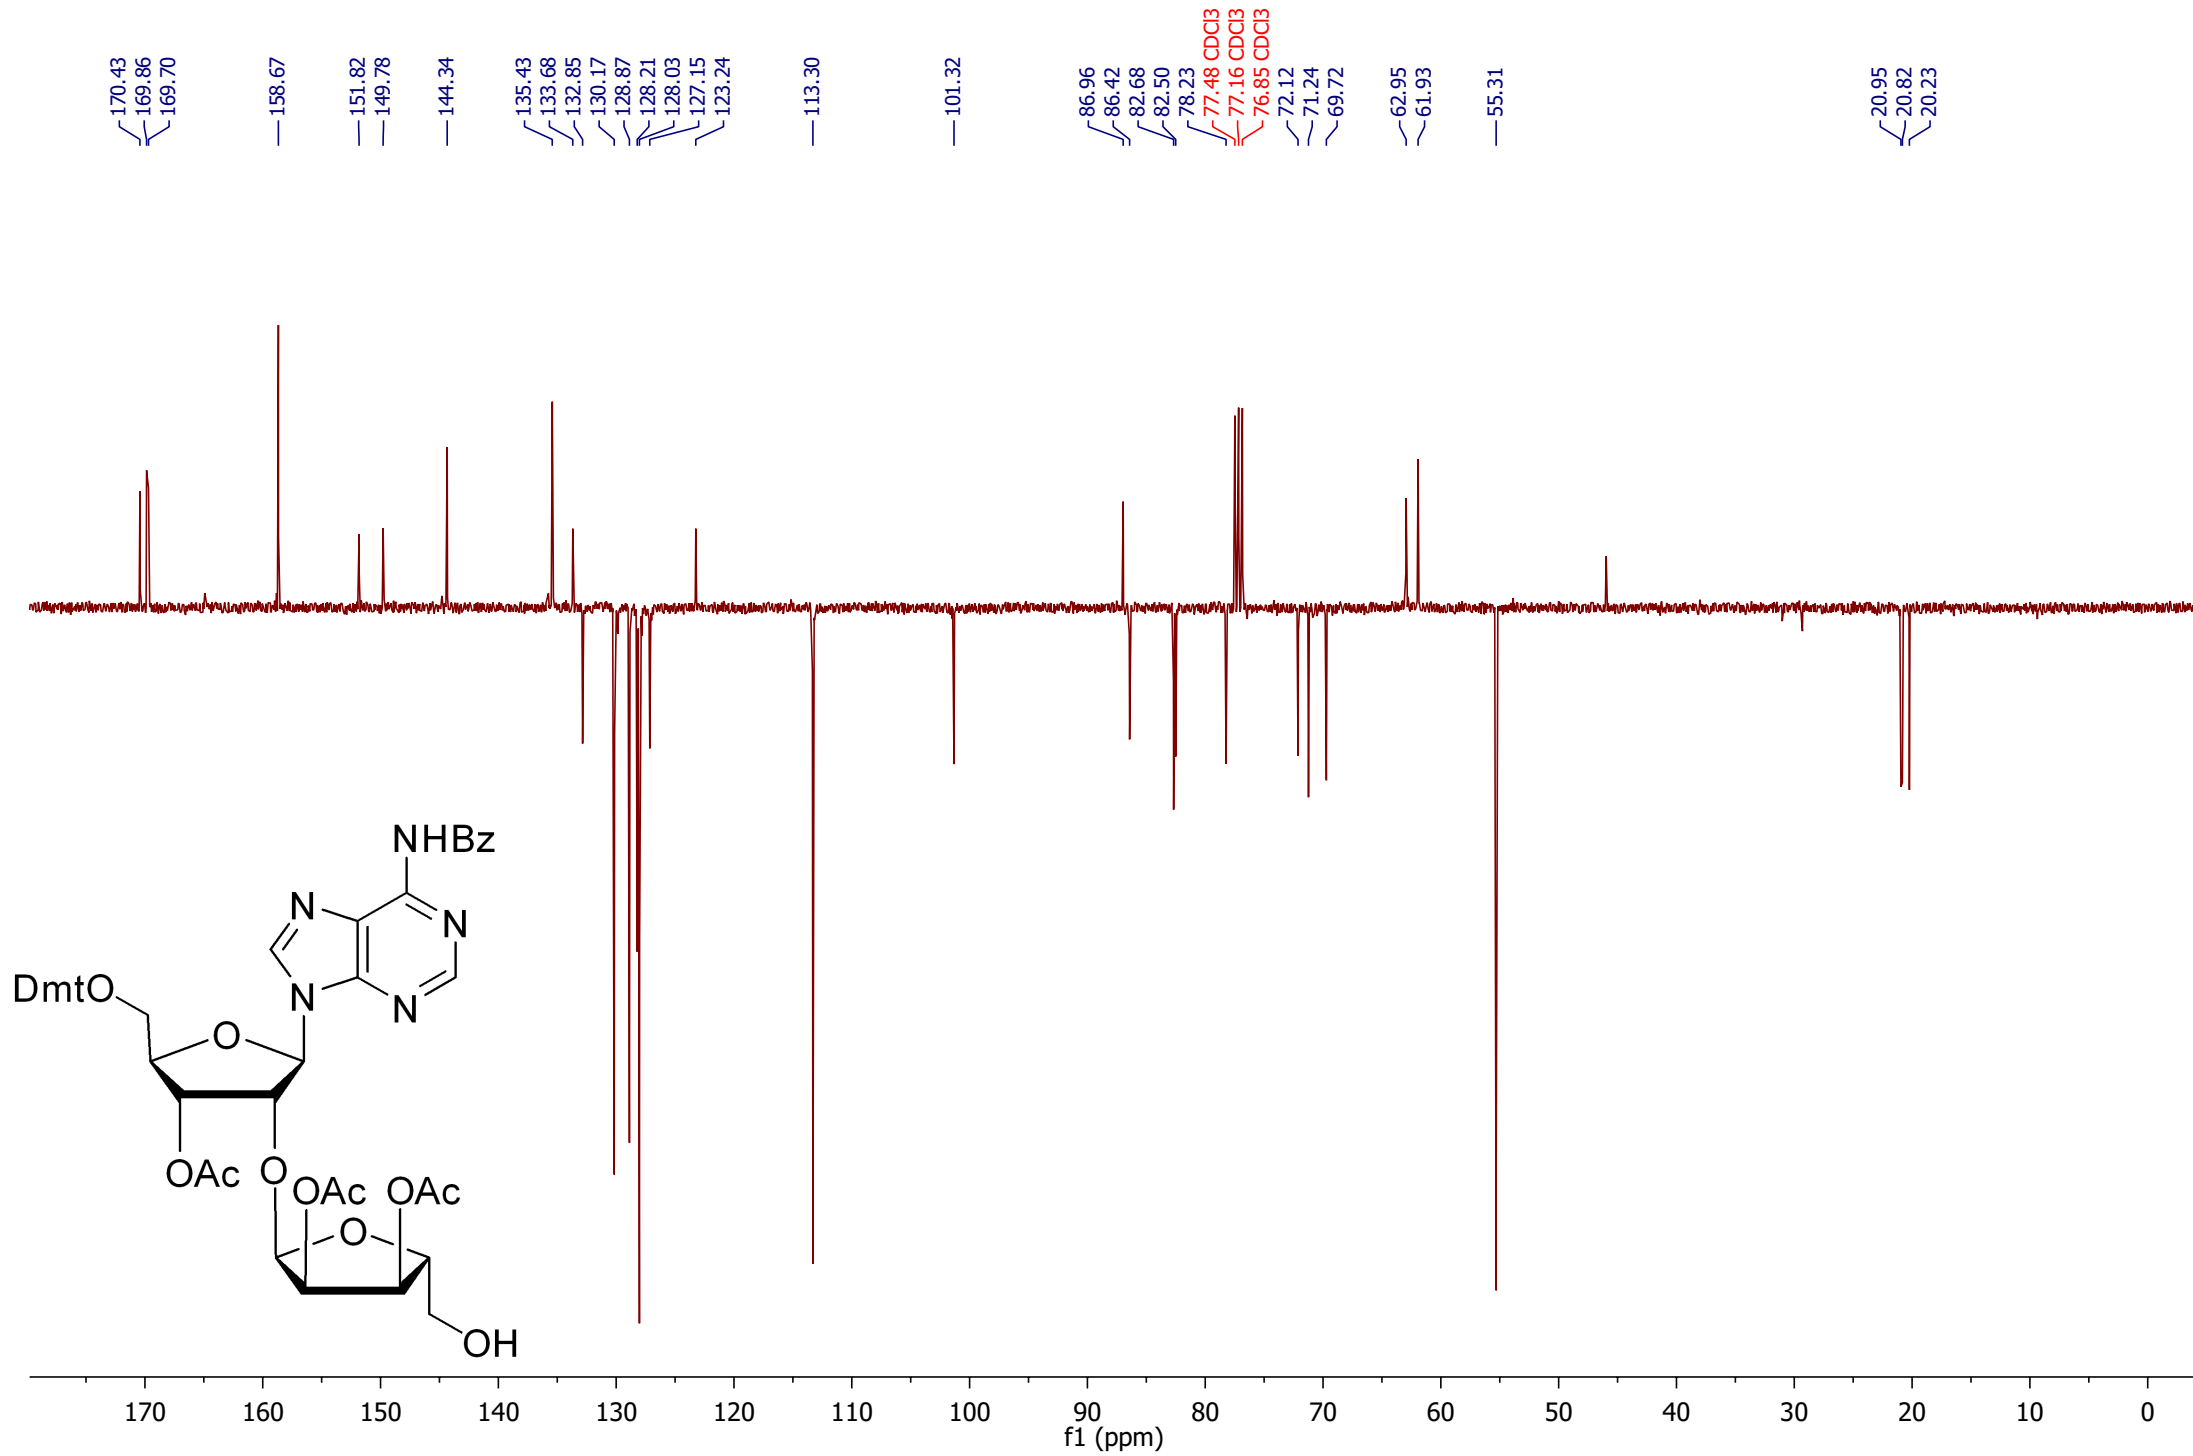

Compound **18**,  $^1\text{H-NMR}$ ,  $\text{CDCl}_3$ , 500 MHz

9.08, 8.78, 8.05, 8.02, 8.01, 8.01, 7.71, 7.70, 7.69, 7.69, 7.68, 7.67, 7.66, 7.62, 7.54, 7.52, 7.51, 7.50, 7.50, 7.49, 7.49, 7.49, 7.49, 7.48, 7.47, 7.45, 7.43, 7.37, 7.36, 7.34, 7.31, 7.31, 7.30, 7.30, 7.27, 7.26, 7.25, 7.25, 7.24, 7.24, 7.23, 7.23, 7.22, 7.22, 7.22, 7.21, 7.21, 5.97, 5.95, 5.65, 5.64, 5.06, 5.05, 5.05, 5.04, 4.95, 4.94, 4.63, 4.62, 4.62, 4.31, 4.30, 4.23, 4.23, 4.22, 4.22, 4.21, 4.21, 4.20, 4.20, 4.20, 4.19, 4.18, 4.08, 4.07, 4.06, 4.05, 3.96, 3.90, 3.89, 3.89, 2.15, 2.09, 1.96

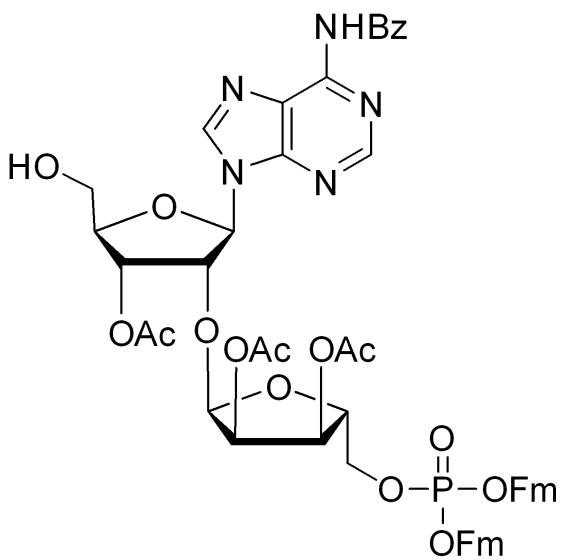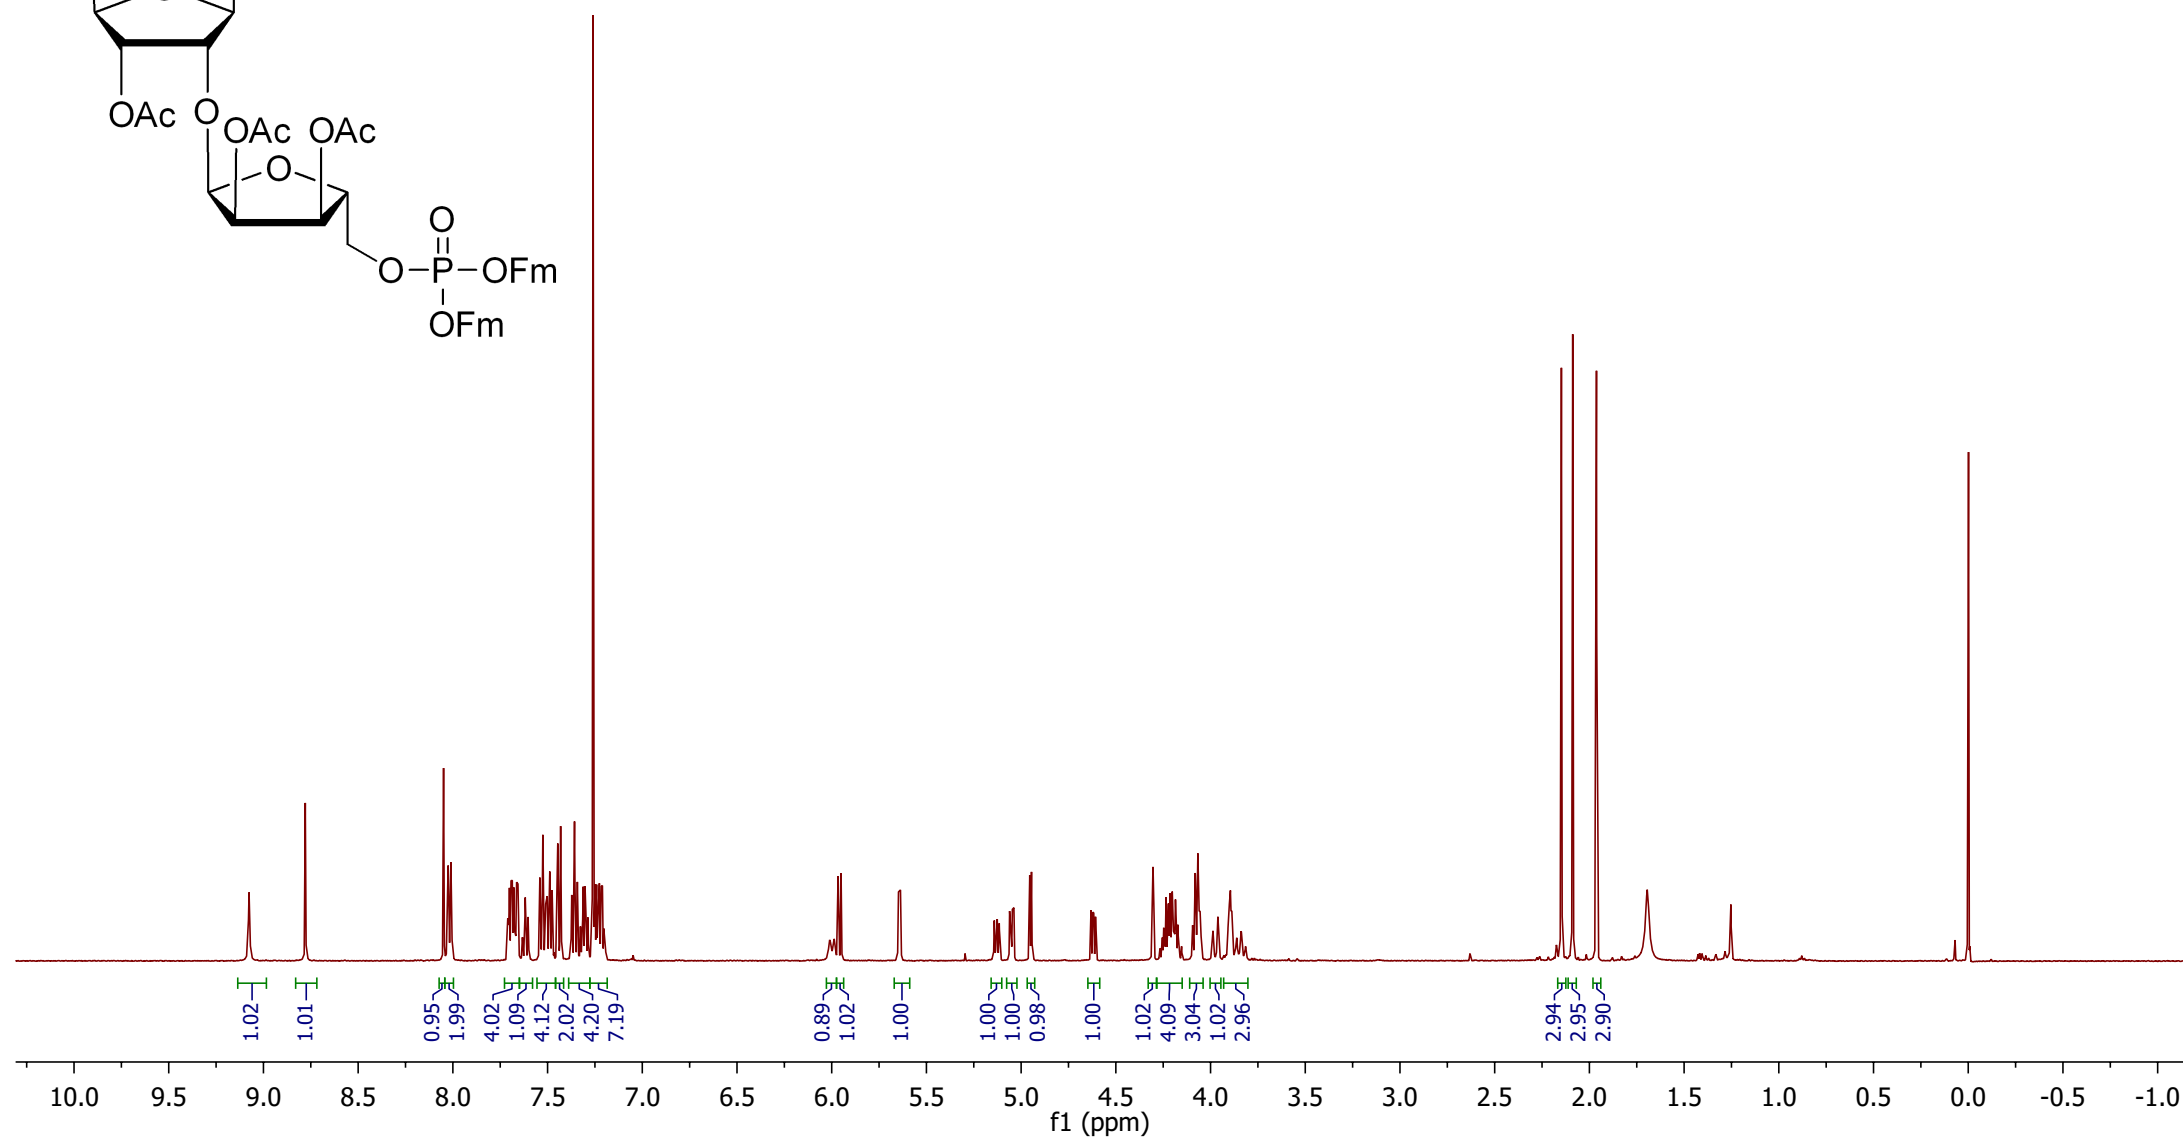

Compound **18**,  $^{13}\text{C}$ -NMR,  $\text{CDCl}_3$ , 126 MHz

169.87  
169.47  
169.20  
164.33  
152.32  
150.50  
150.43  
143.01  
142.96  
142.93  
142.85  
141.34  
141.30  
133.38  
132.96  
128.92  
127.89  
127.88  
127.84  
127.11  
125.10  
125.08  
125.06  
124.57  
119.98  
119.97  
119.95  
119.94

100.97

89.43

86.58

80.24

77.62

73.60

70.84

69.35

69.31

69.14

66.10

62.75

47.83

47.77

20.88

20.62

20.25

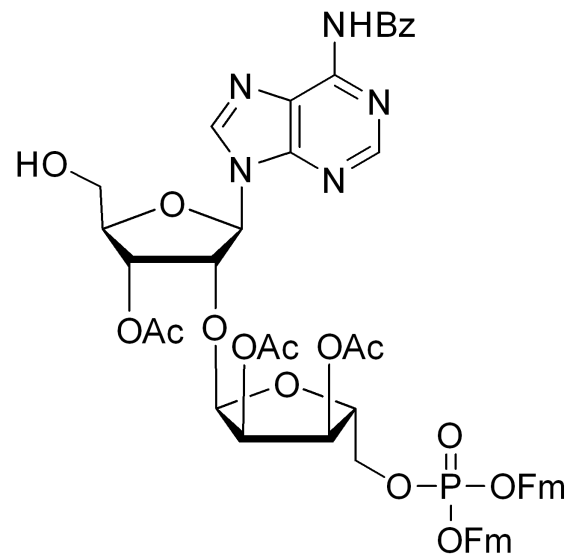

180 170 160 150 140 130 120 110 100 90 80 70 60 50 40 30 20 10 0  
f1 (ppm)

Compound **18**,  $^{31}\text{P}$ -NMR,  $\text{CDCl}_3$ , 202 MHz

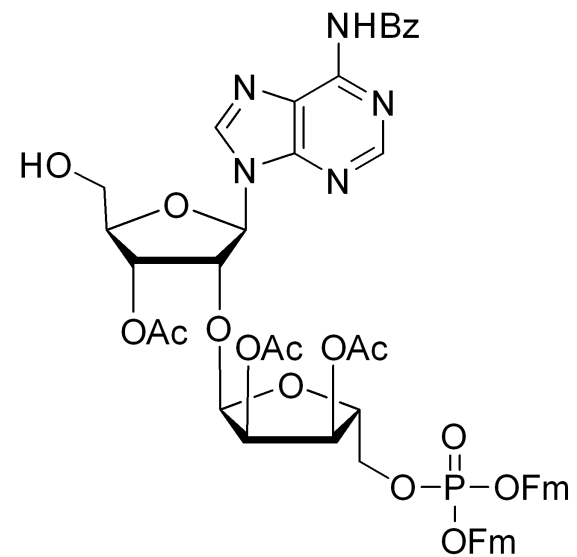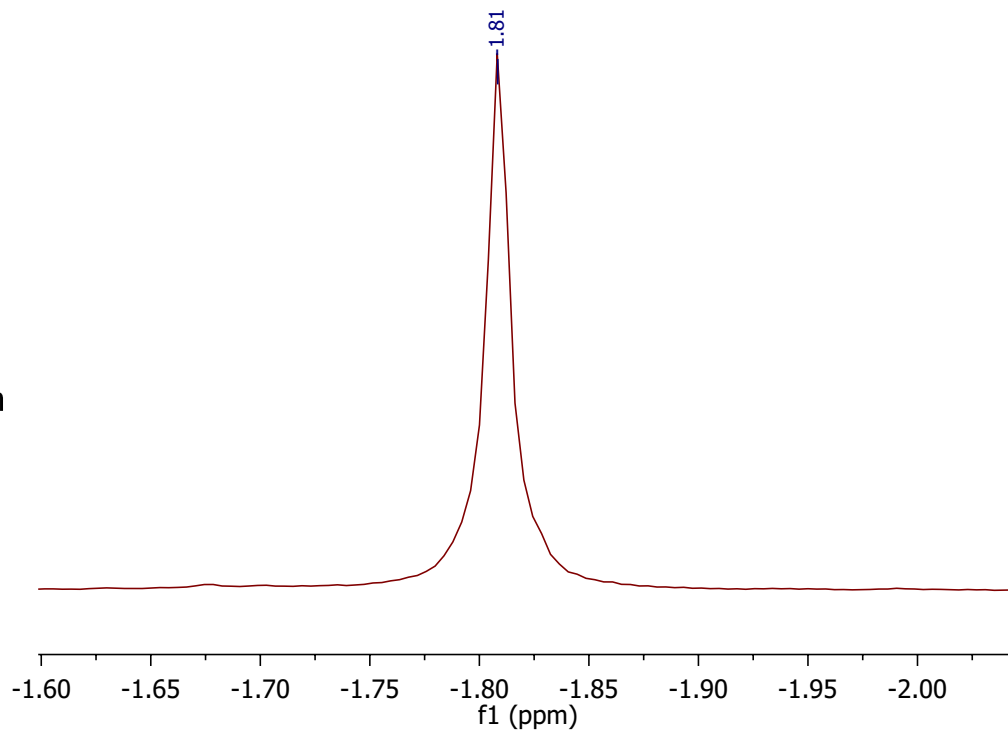

— -1.81

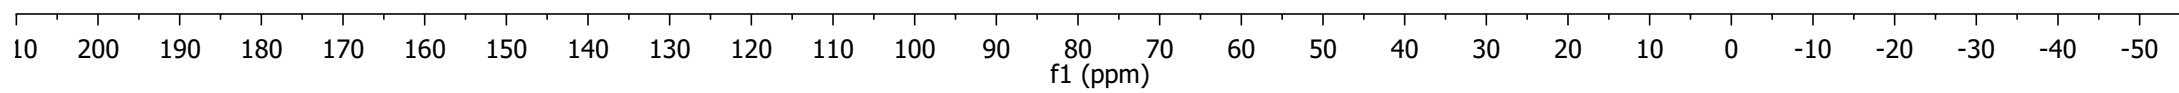

Compound **3**, <sup>1</sup>H-NMR, CDCl<sub>3</sub>, 500 MHz

8.45, 8.43, 8.02, 8.01, 8.00, 7.70, 7.70, 7.69, 7.69, 7.68, 7.68, 7.68, 7.67, 7.67, 7.66, 7.66, 7.65, 7.65, 7.52, 7.51, 7.50, 7.49, 7.49, 7.48, 7.47, 7.45, 7.45, 7.45, 7.45, 7.44, 7.44, 7.43, 7.43, 7.43, 7.35, 7.34, 7.34, 7.34, 7.32, 7.32, 7.30, 7.29, 7.28, 7.26, 7.25, 7.23, 7.23, 7.22, 7.21, 7.21, 7.21, 7.20, 5.24, 5.23, 4.23, 4.23, 4.22, 4.22, 4.22, 4.21, 4.21, 4.20, 4.20, 4.11, 4.10, 4.08, 4.08, 4.07, 3.95, 2.69, 2.13, 2.08, 2.03, 1.83, 1.81, 1.27, 1.25, 1.25, 1.24, 1.24, 1.24, 1.23, 1.18, 1.18, 1.17, 1.16, 1.16, 1.15, 1.14, 1.13

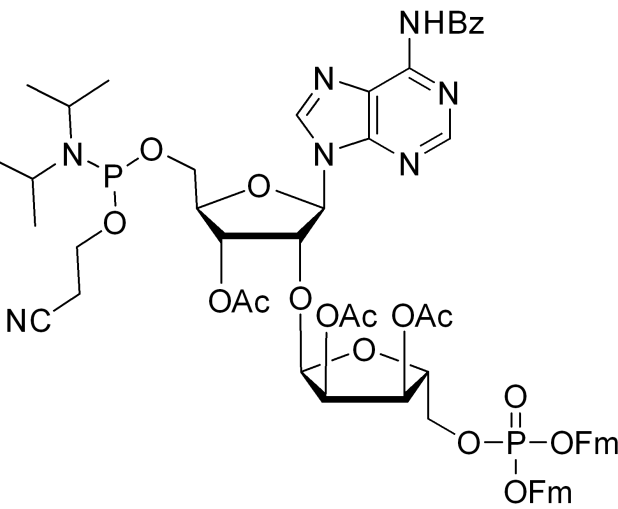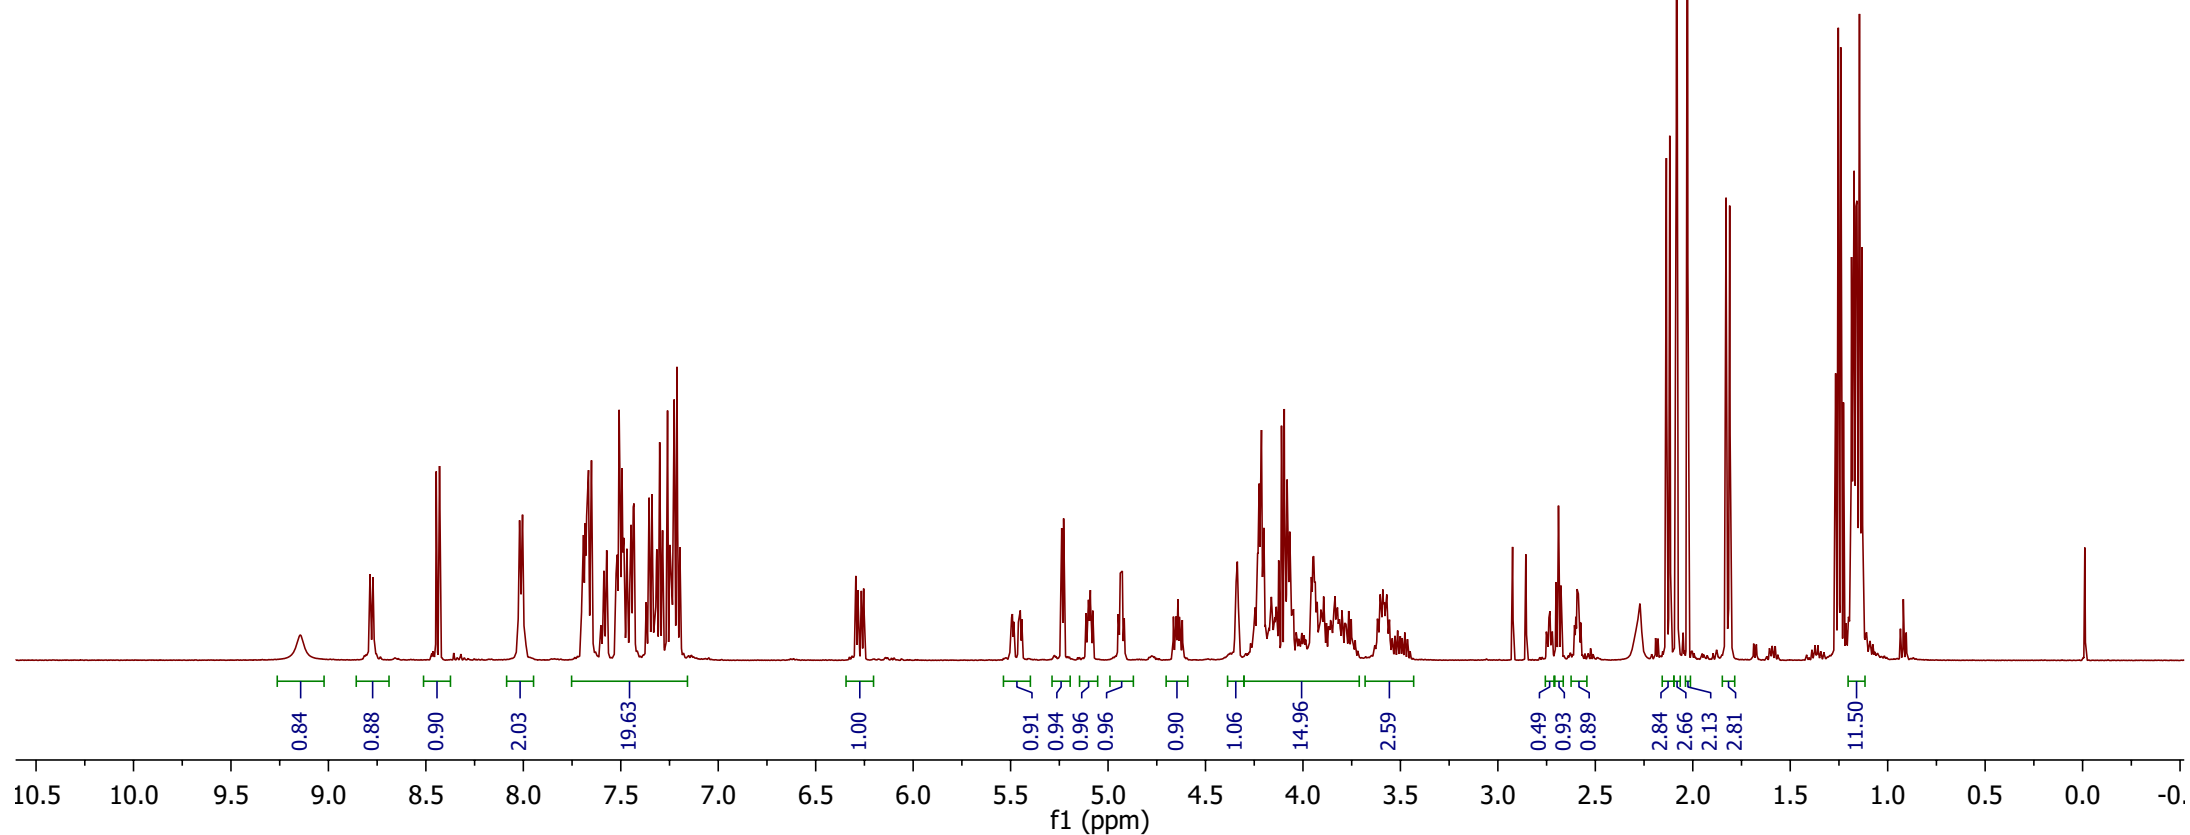

Compound **3**,  $^{13}\text{C}$ -NMR,  $\text{CDCl}_3$ , 126 MHz

170.01  
170.00  
169.70  
169.66  
169.33  
169.30  
164.59  
164.56

151.91  
151.81  
149.61  
142.97  
142.95  
142.88  
142.87  
141.34  
141.32

132.76  
132.75  
128.86  
128.84  
127.87  
127.11  
125.06  
125.02  
123.12

122.99  
119.99  
119.95  
117.90  
117.68  
101.51

86.11  
85.77  
83.06  
82.99  
82.75  
82.67  
80.42  
80.36  
79.39  
79.36

72.32  
72.09  
70.72  
70.70  
69.33  
69.29  
69.22  
69.18

66.33  
66.29  
66.25  
62.68  
62.59  
62.55  
62.46  
58.72  
58.59

58.56  
58.42  
47.85  
47.82  
47.79  
47.76  
43.22  
43.17  
43.12

43.07  
24.70  
24.65  
20.88  
20.81  
20.67  
20.40  
20.34  
20.11  
20.08

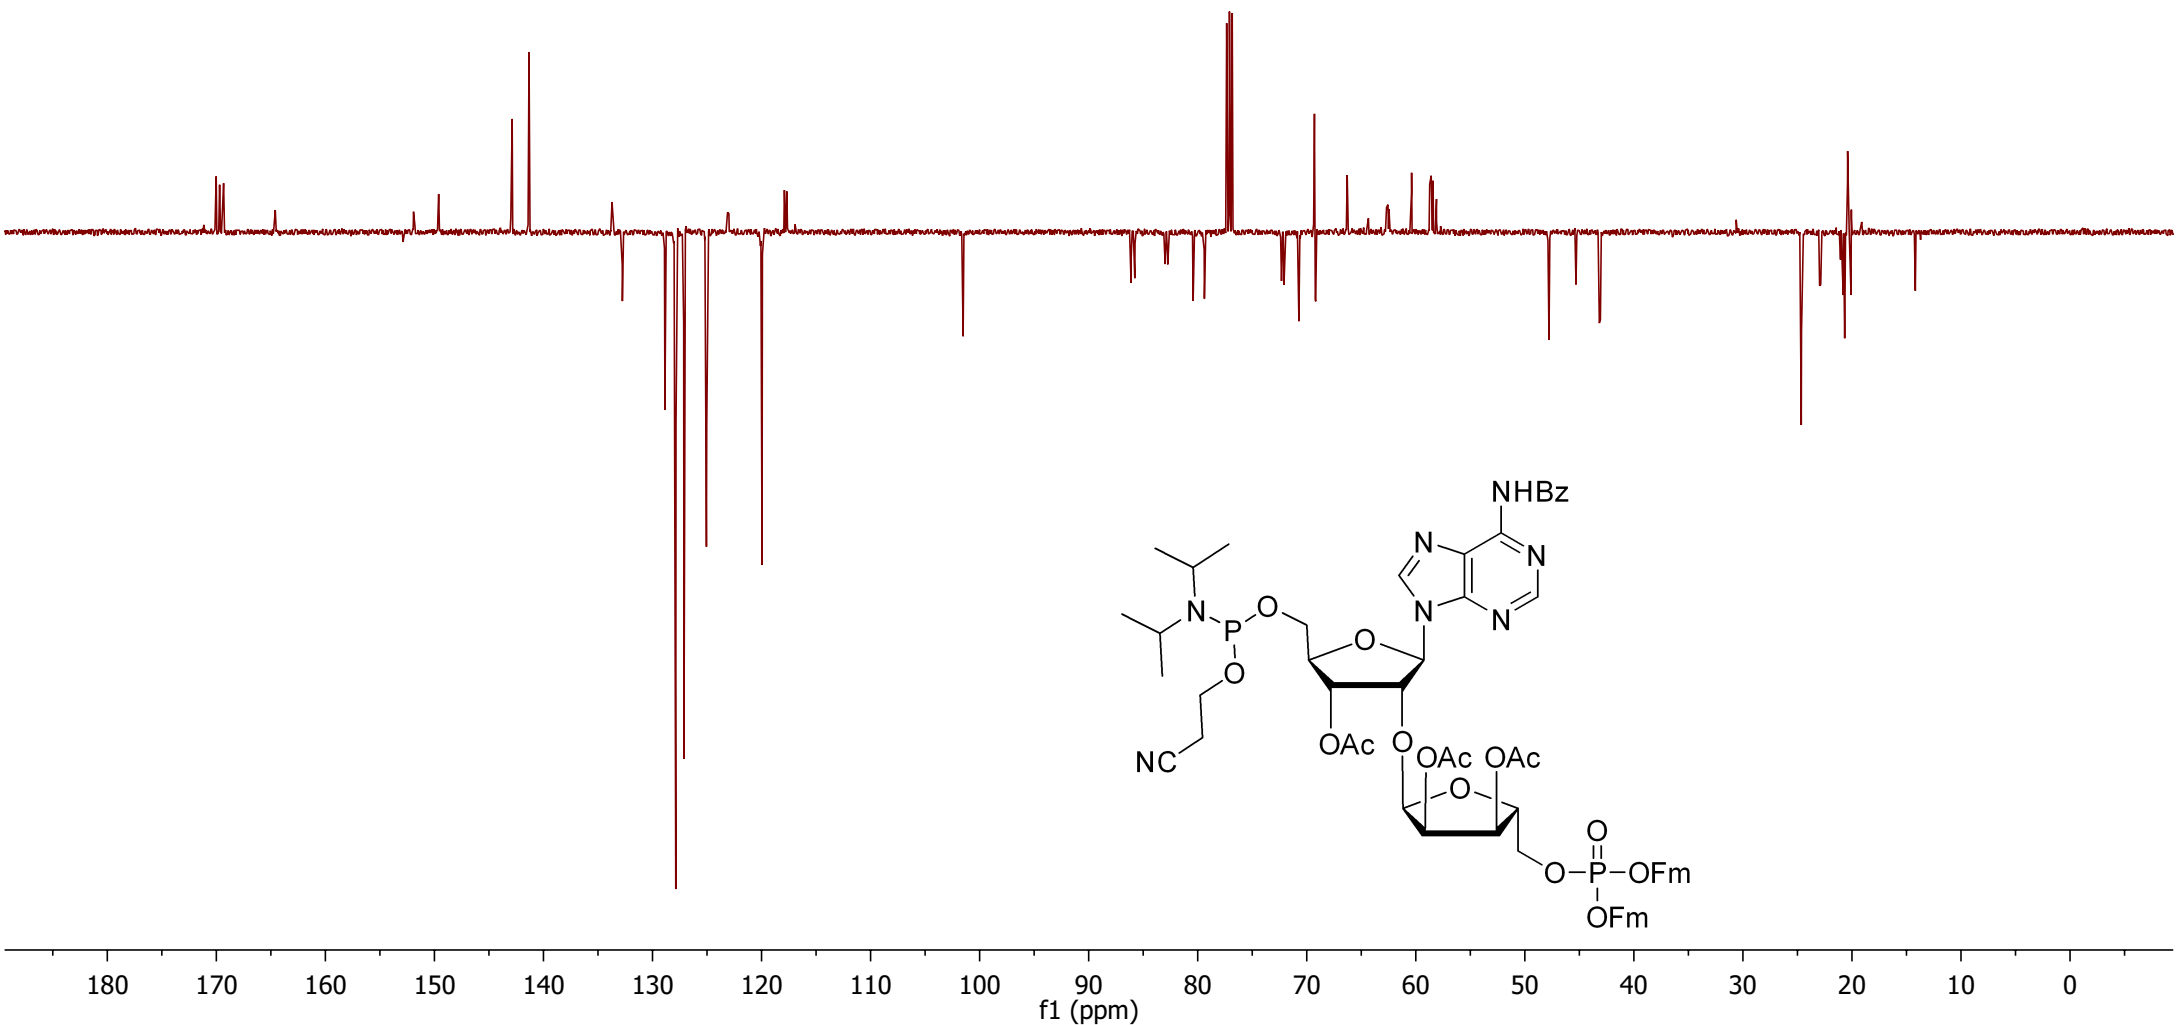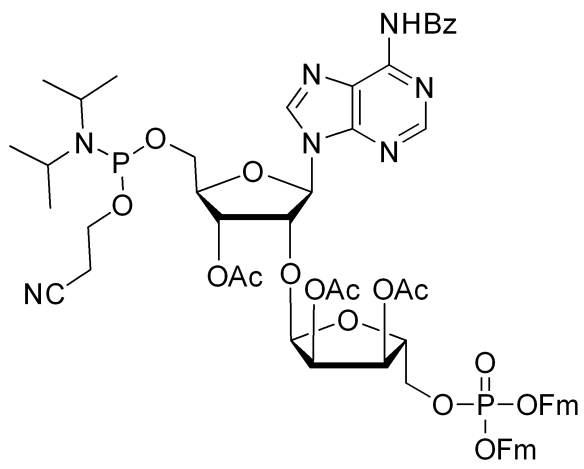

Compound **3**,  $^{31}\text{P}$ -NMR,  $\text{CDCl}_3$ , 202 MHz

149.40  
149.00

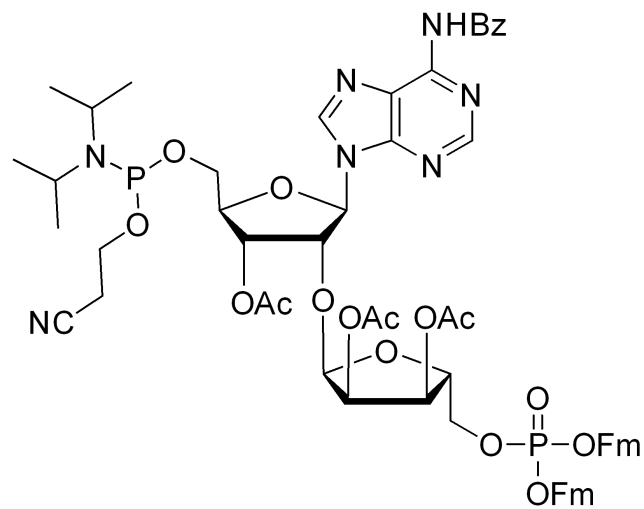

14.17

-1.67  
-1.69

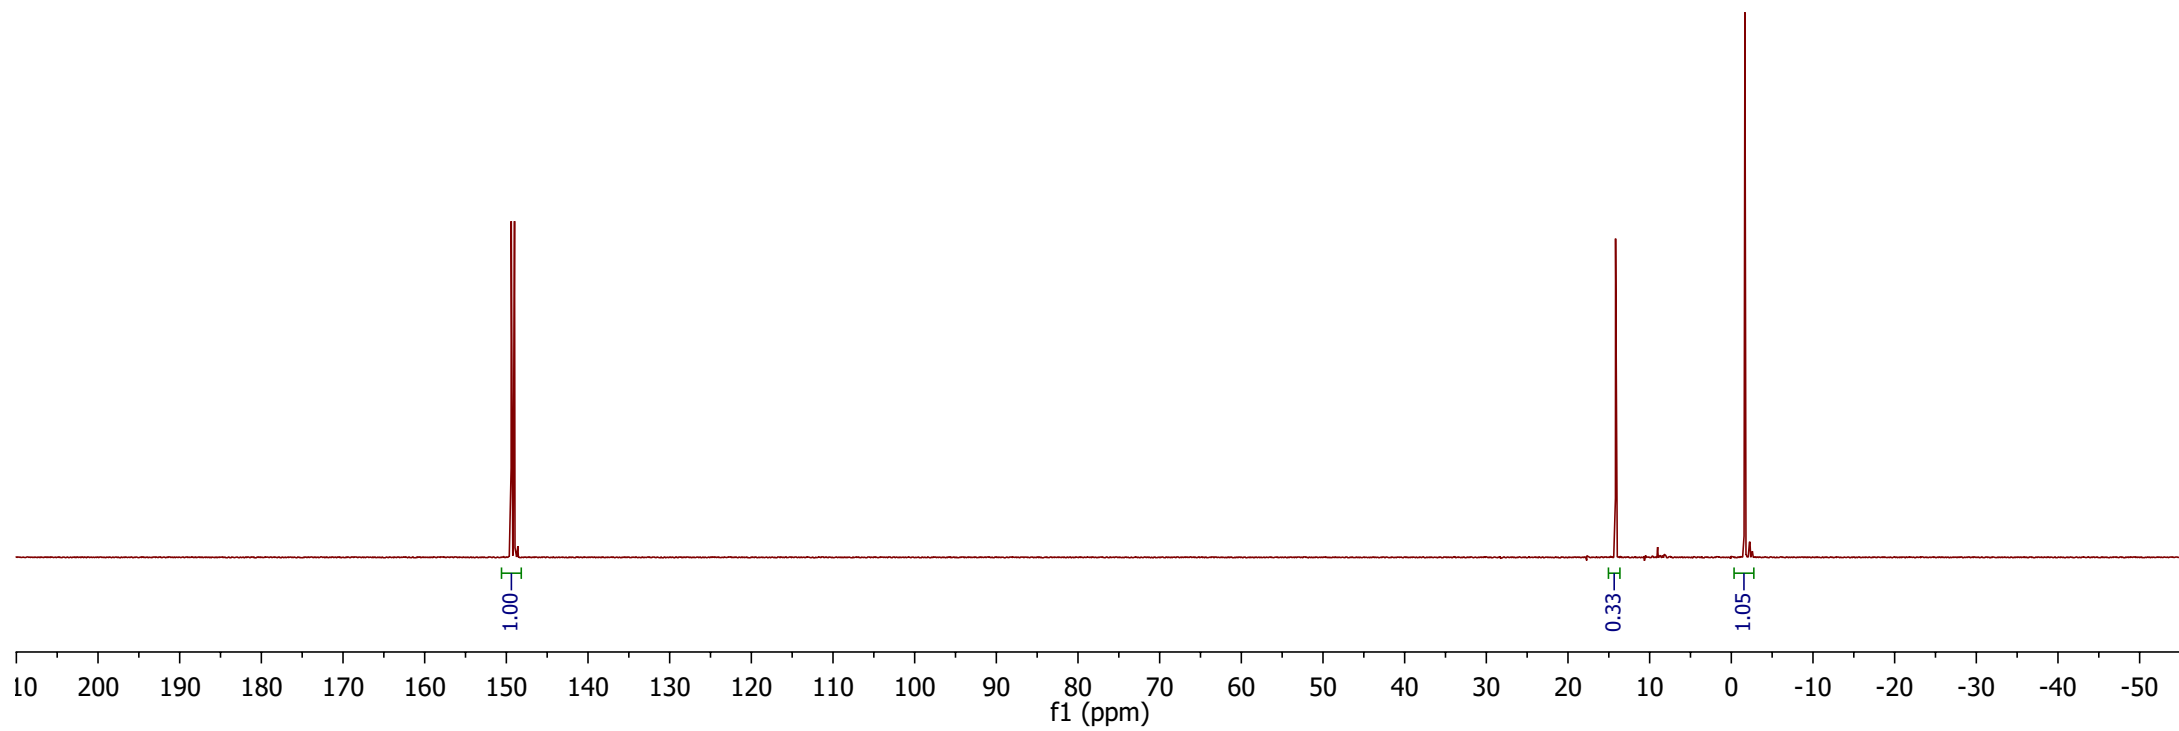



Compound **1a**, <sup>1</sup>H-NMR, D<sub>2</sub>O, 850 MHz

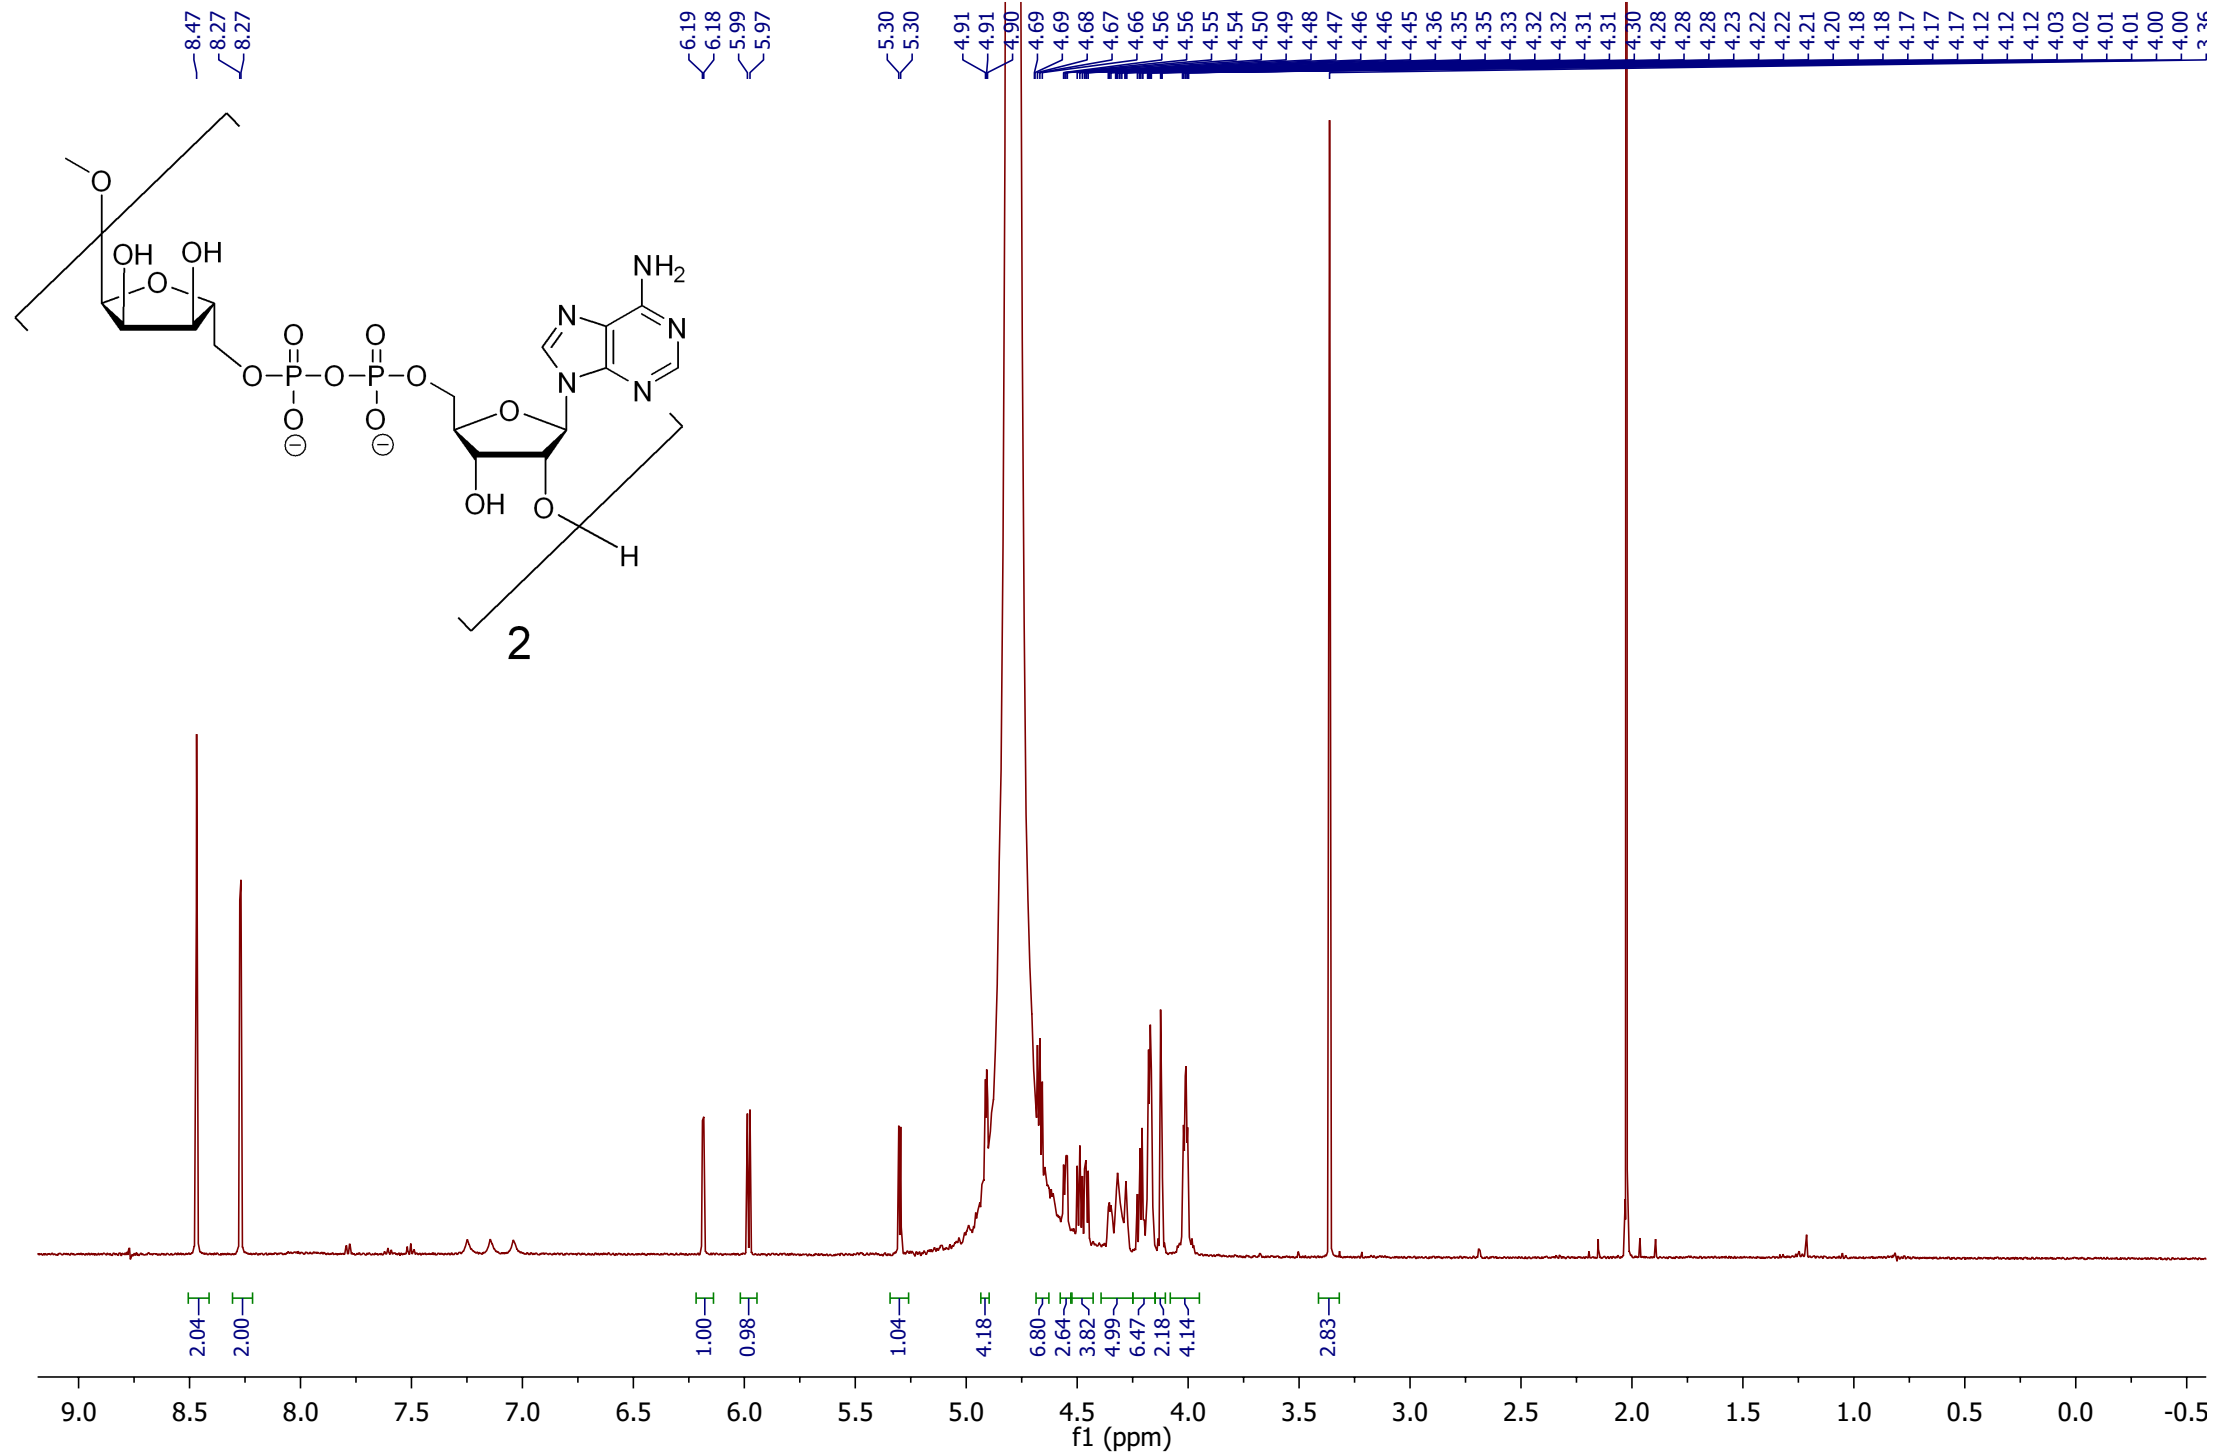

Compound **1a**,  $^1\text{H}$ -NMR,  $\text{D}_2\text{O}$ ,  $\text{H}_2\text{O}$  suppression, 850 MHz

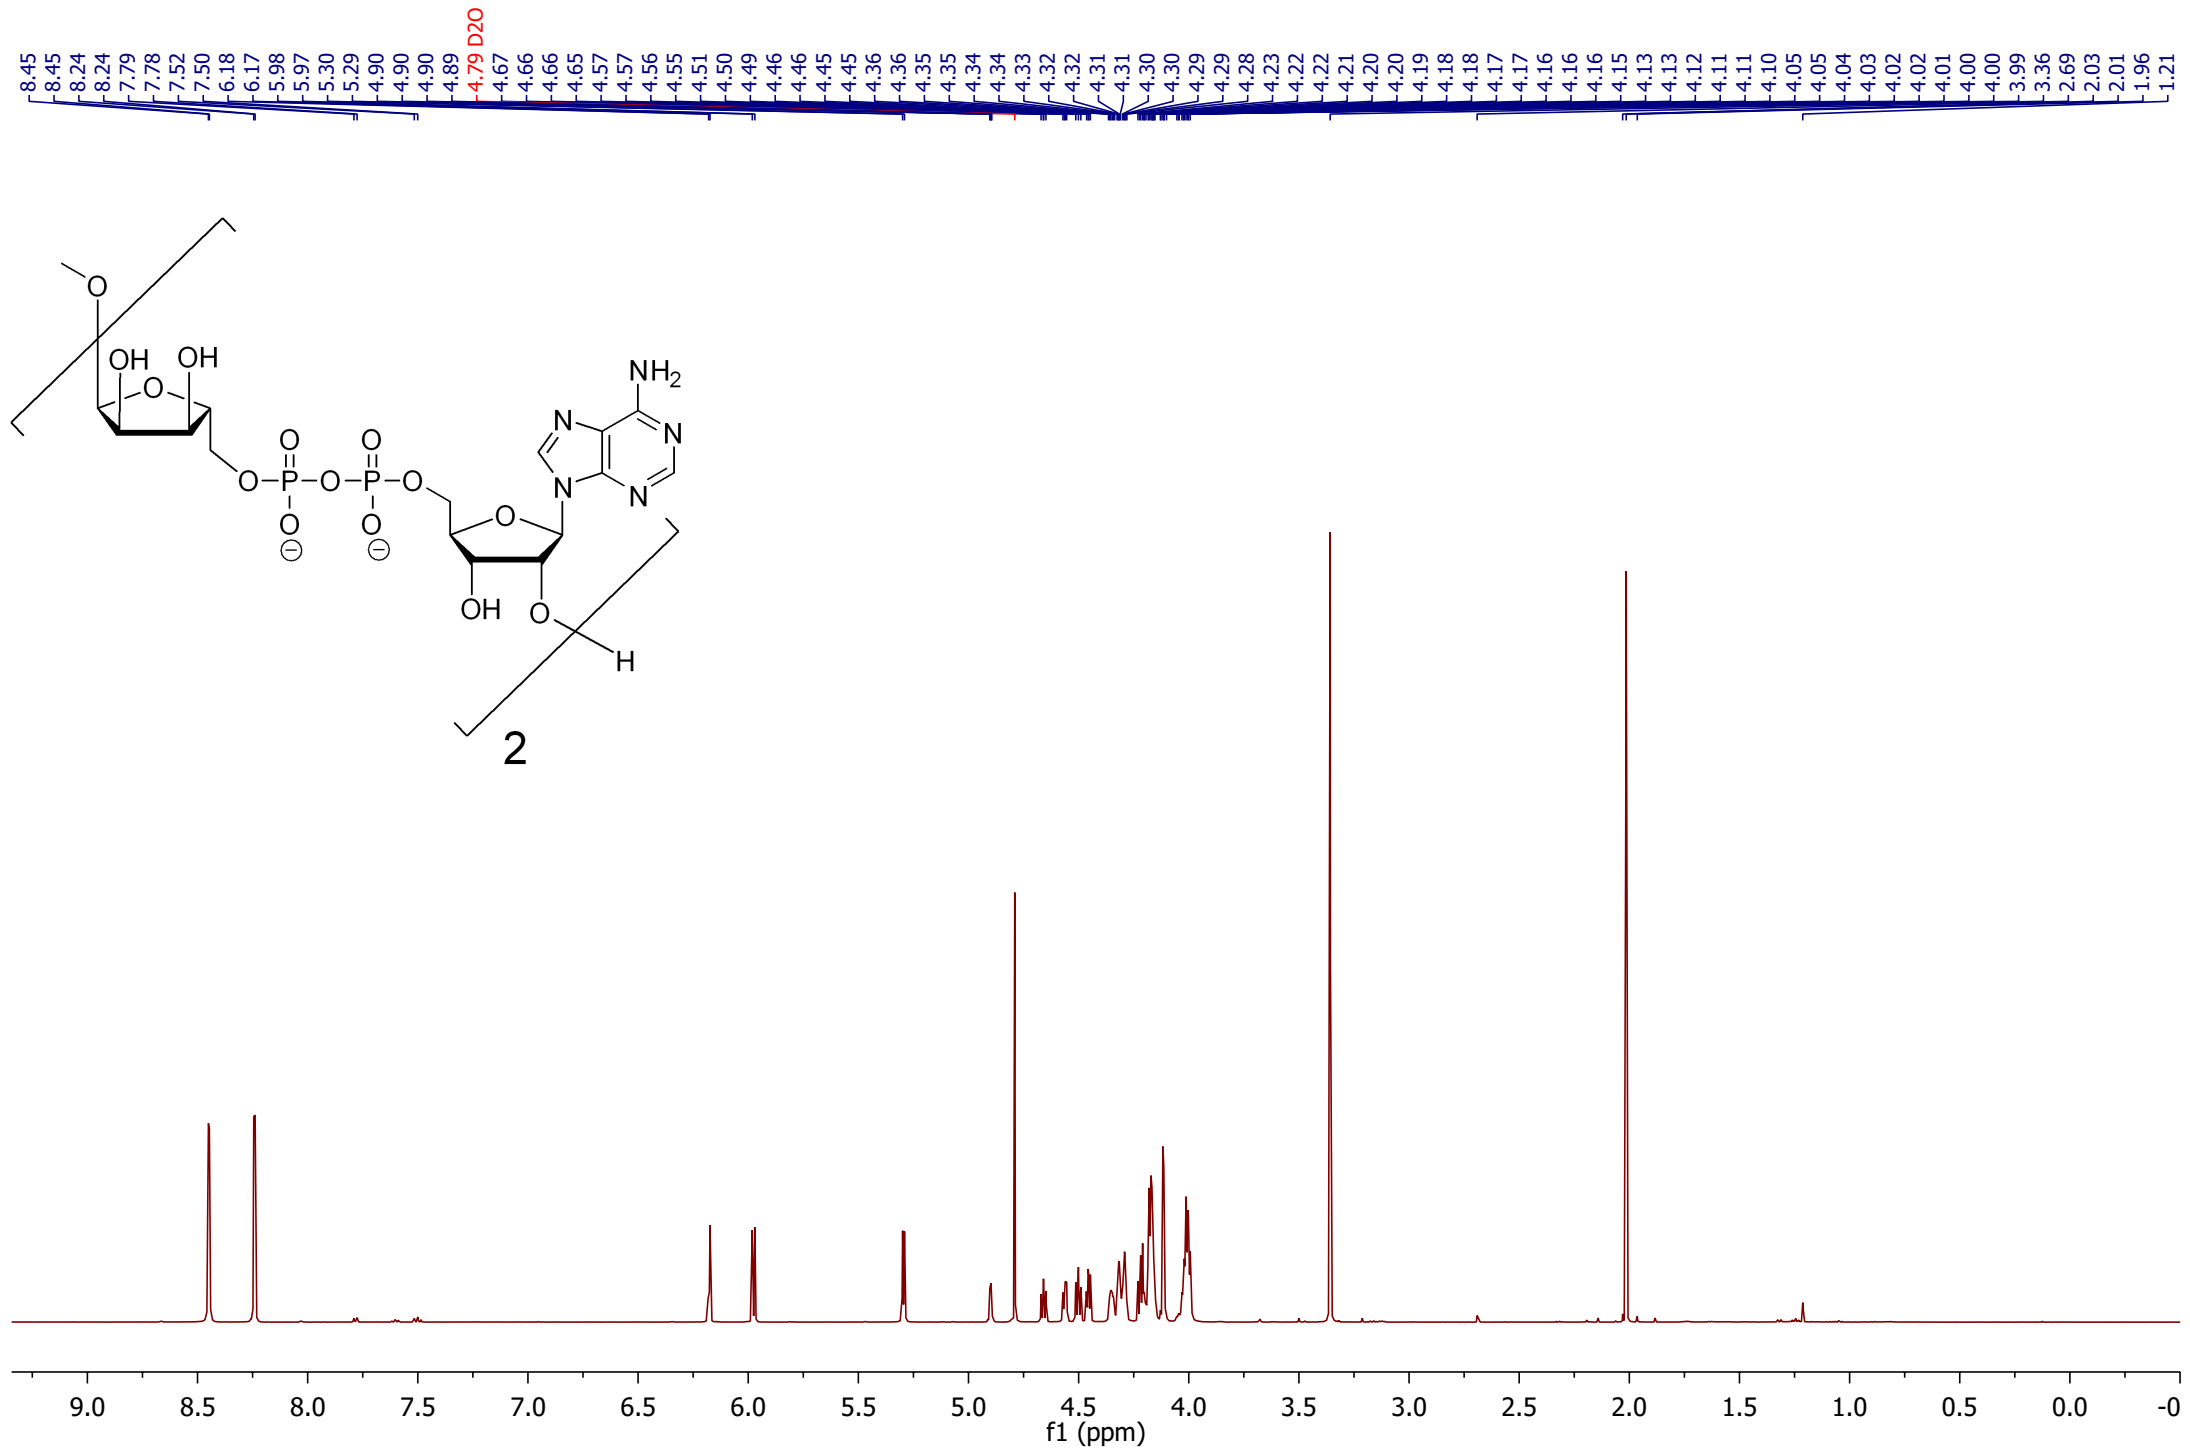

Compound **1a**,  $^{13}\text{C}$ -NMR,  $\text{D}_2\text{O}$ , 202 MHz

152.43  
152.30  
148.37  
147.92

118.40  
118.19

103.20  
101.24

87.27  
87.09  
84.19  
84.15  
84.13  
83.17  
83.10  
83.02  
78.87  
74.57  
71.33  
70.78  
70.49  
69.78  
69.61  
68.72  
65.59  
65.55  
65.23  
65.21  
64.29  
64.25  
55.40

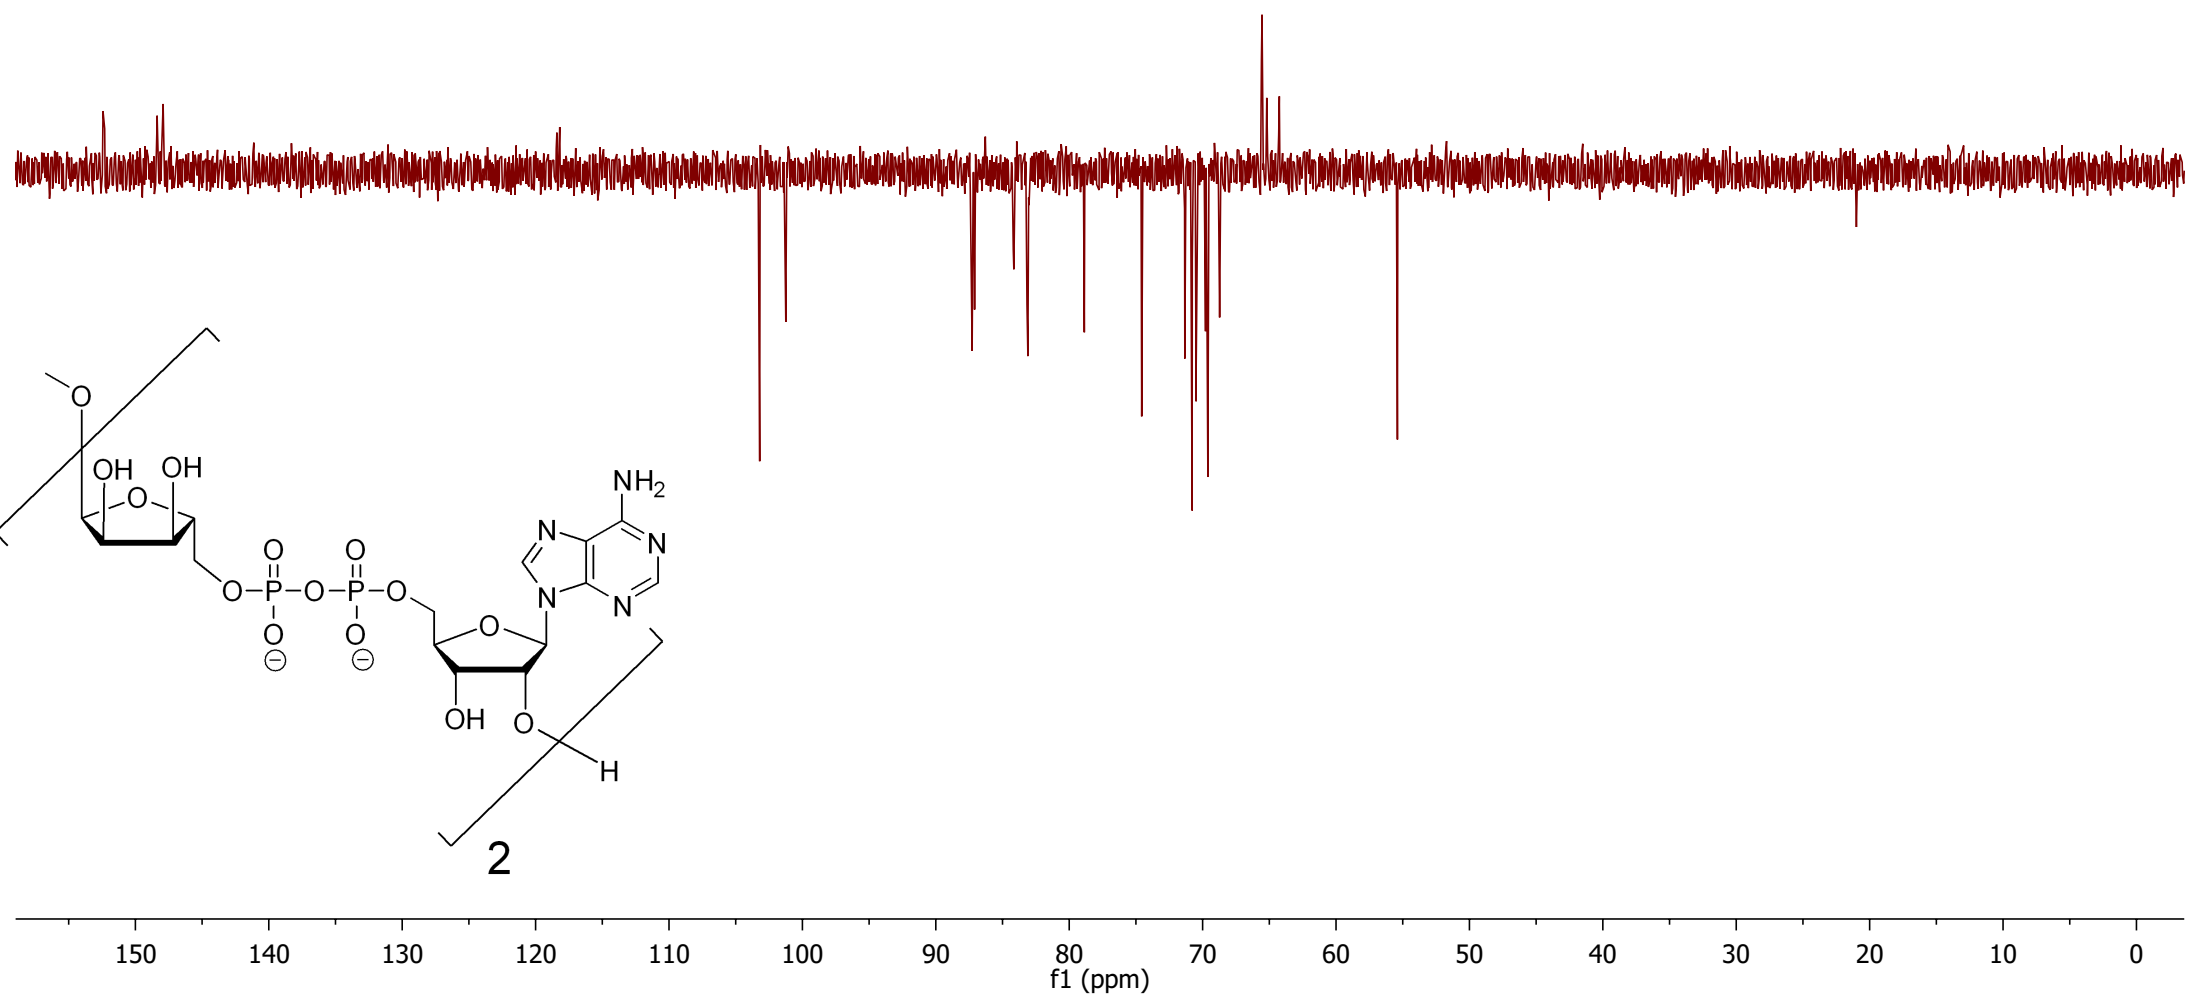

2

Compound **1a**,  $^{31}\text{P}$ -NMR,  $\text{D}_2\text{O}$ , 202 MHz

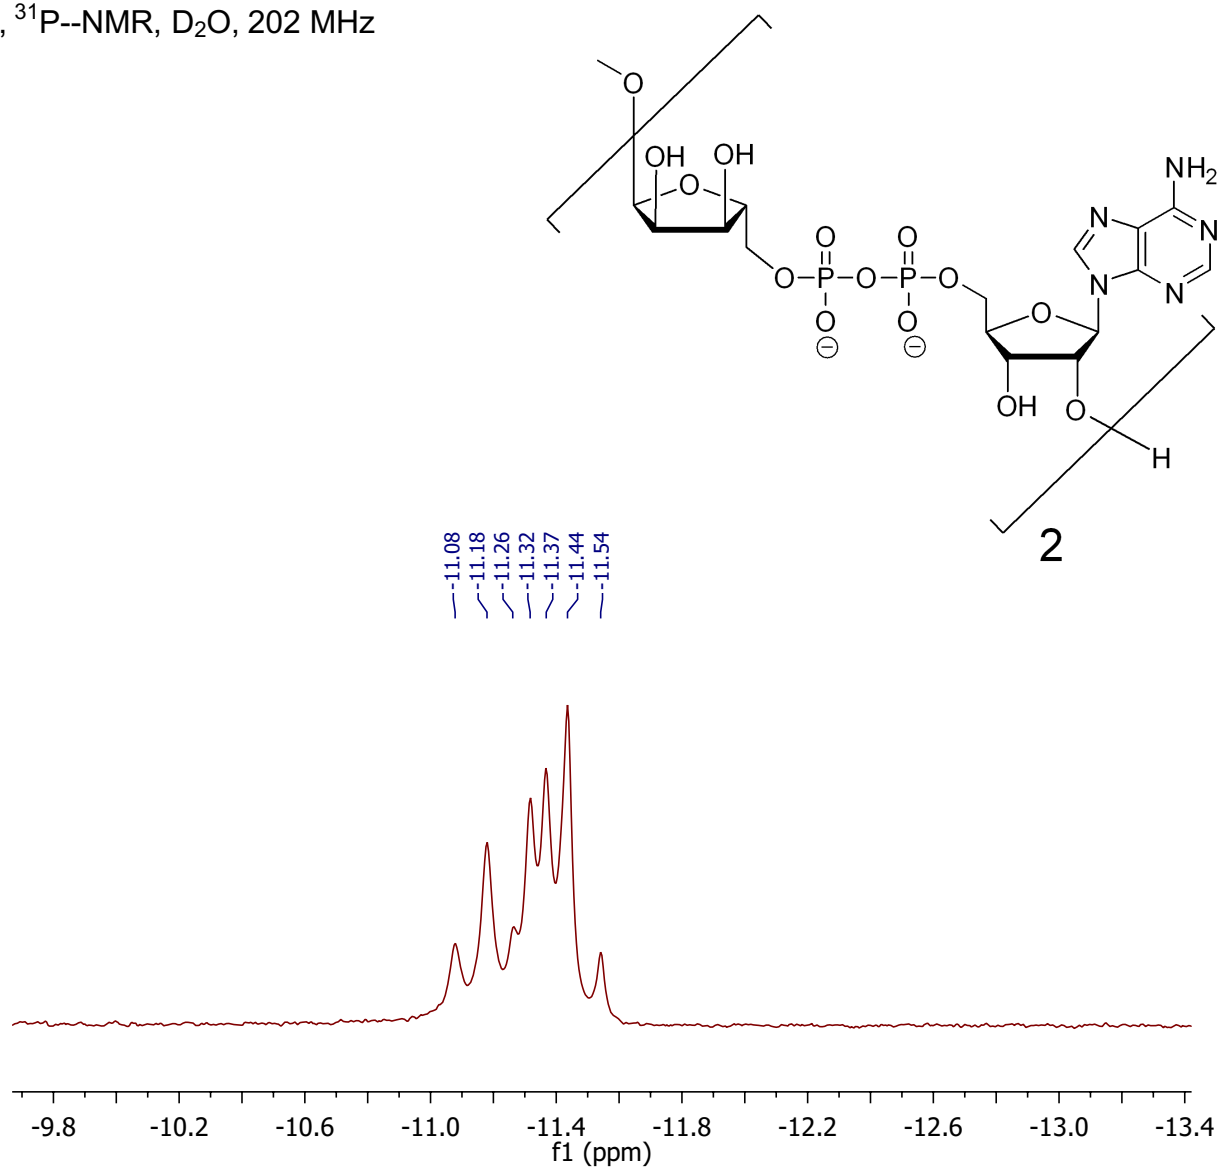

-11.08  
-11.18  
-11.26  
-11.32  
-11.37  
-11.44  
-11.54

10 200 190 180 170 160 150 140 130 120 110 100 90 80 70 60 50 40 30 20 10 0 -10 -20 -30 -40 -50

f1 (ppm)

Compound **1a**, COSY, D<sub>2</sub>O, 850 MHz

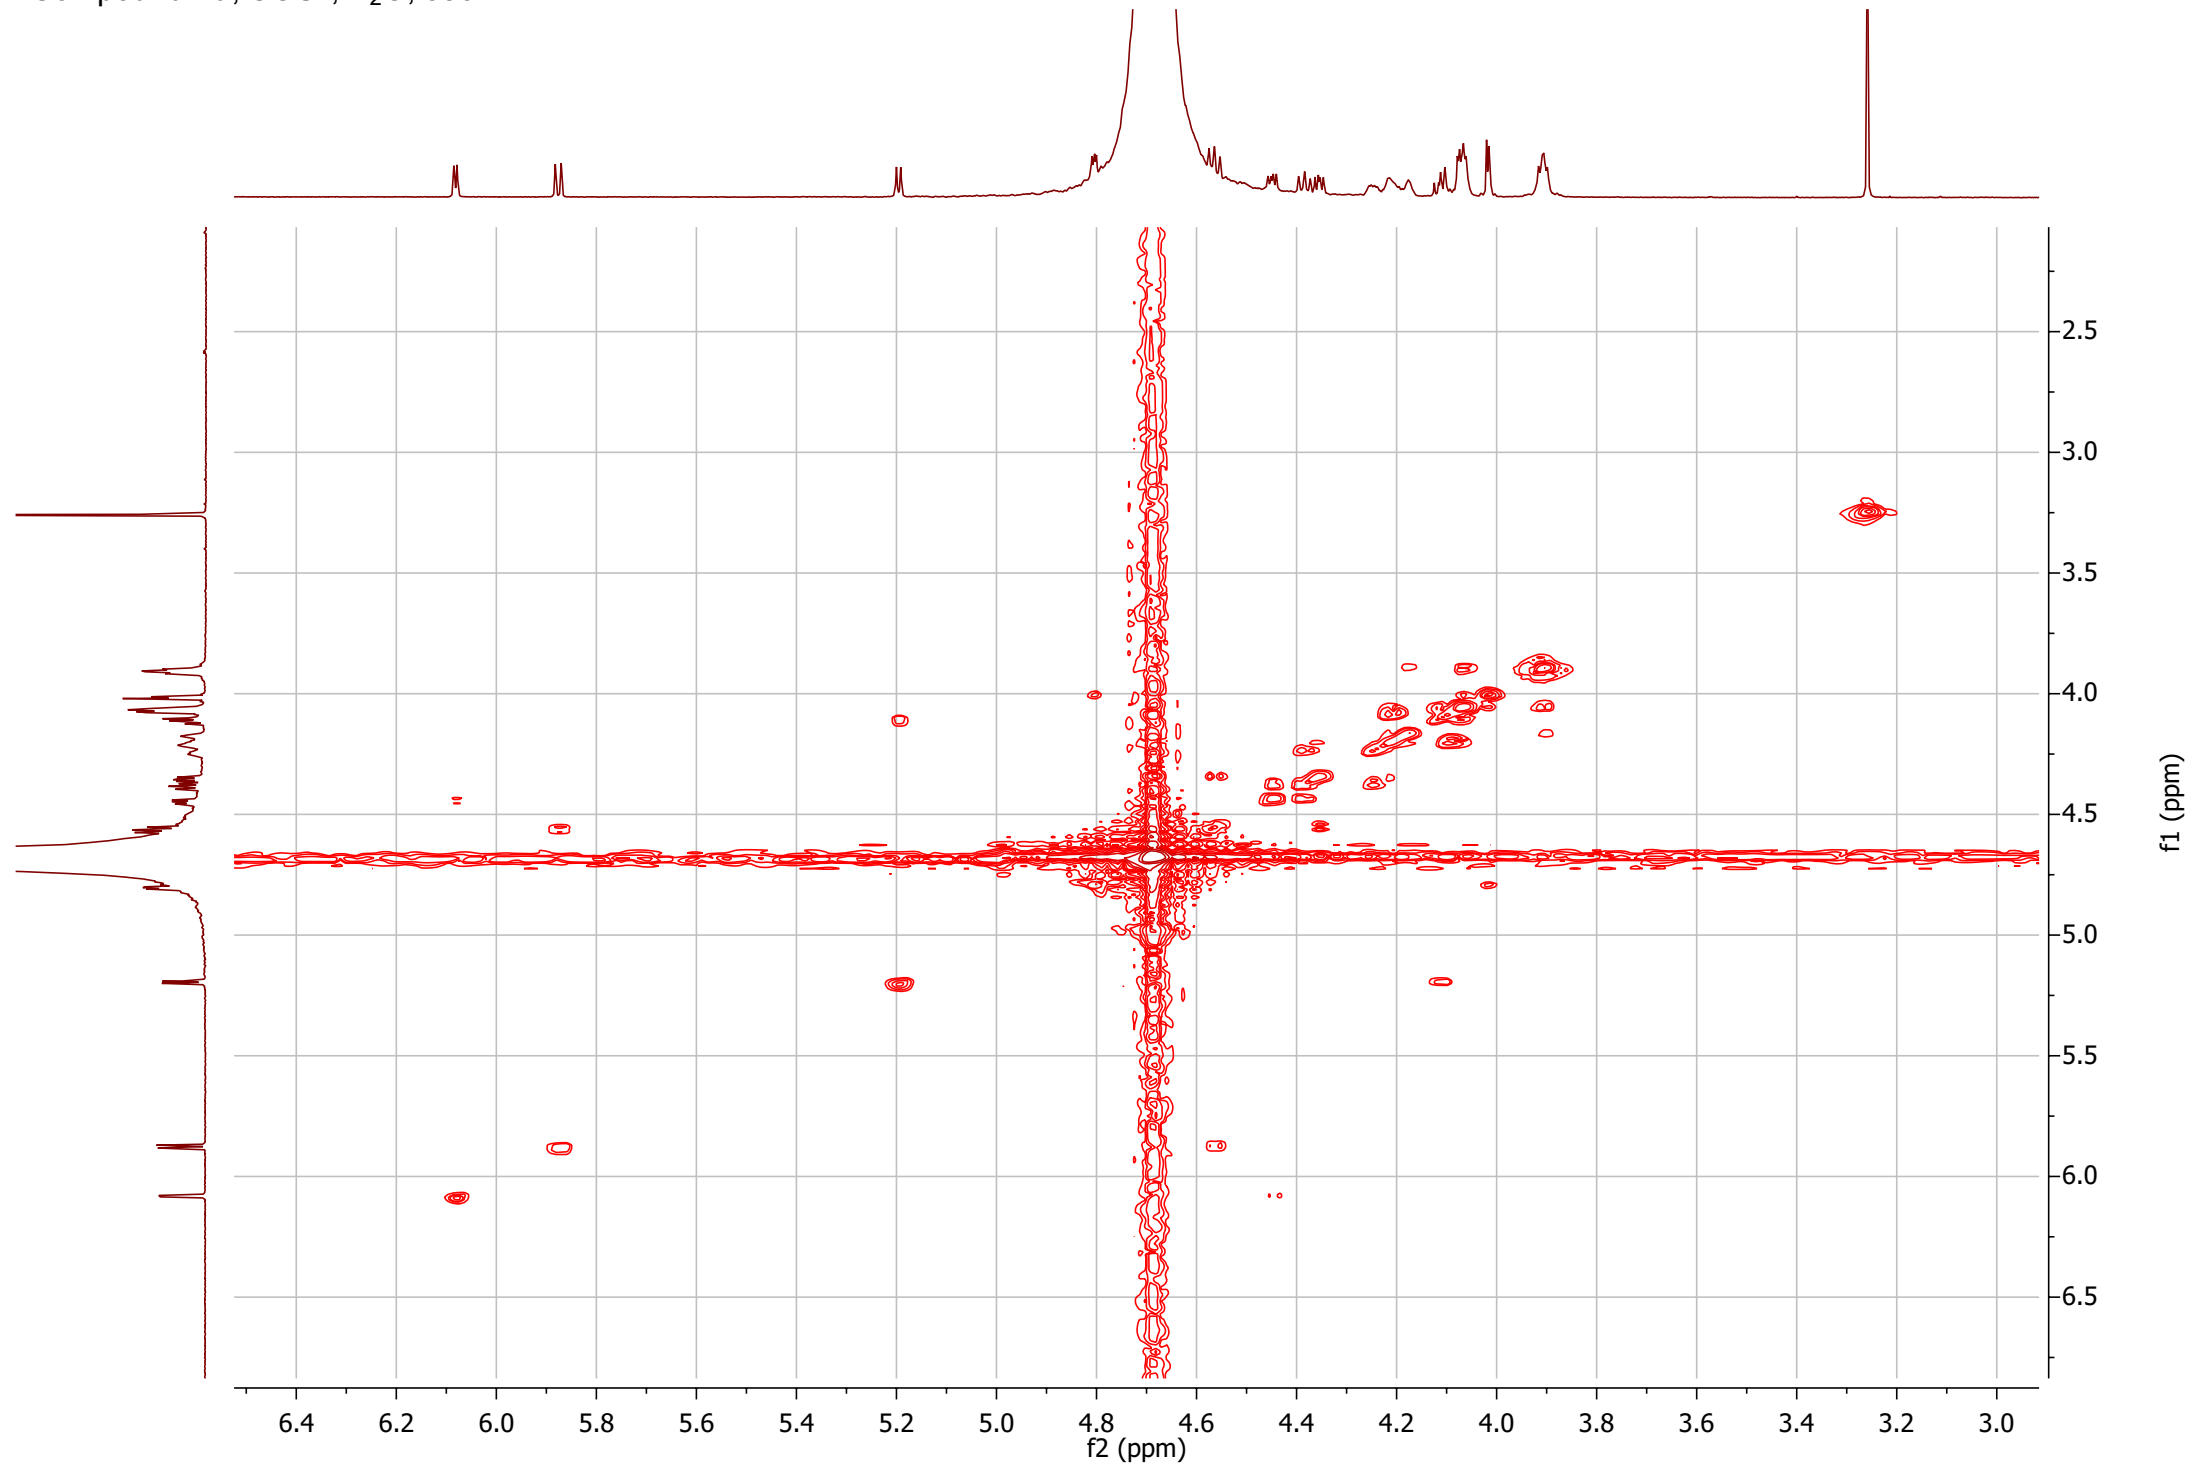

Compound **1a**, HSQC, D<sub>2</sub>O, 850 MHz

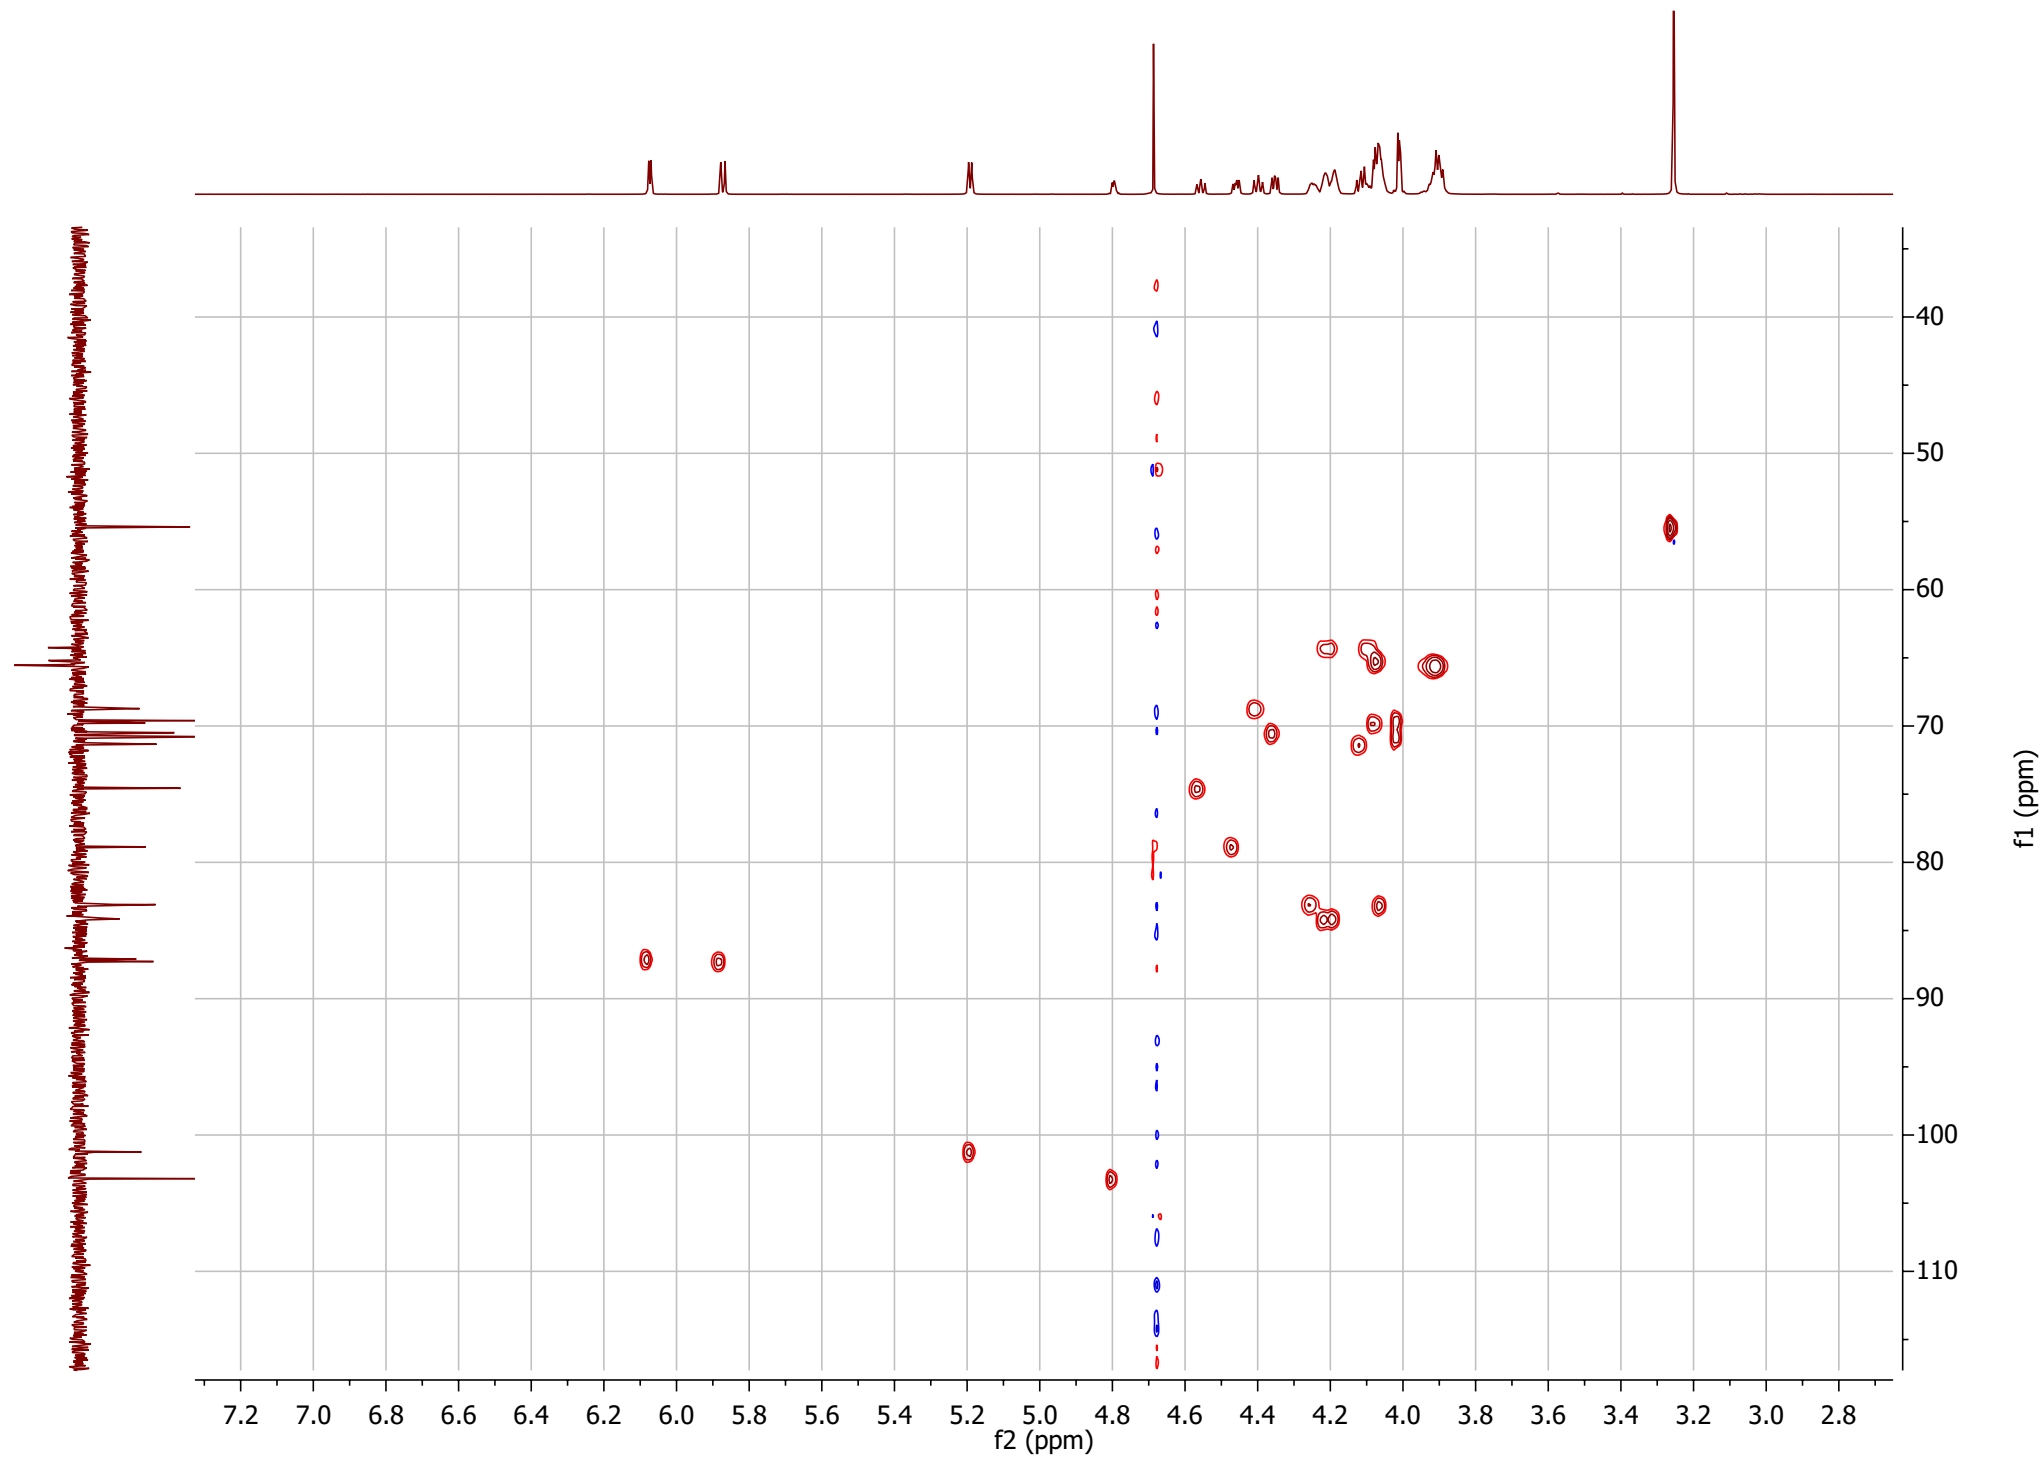

Compound **1b**,  $^1\text{H-NMR}$ ,  $\text{D}_2\text{O}$ , 500 MHz

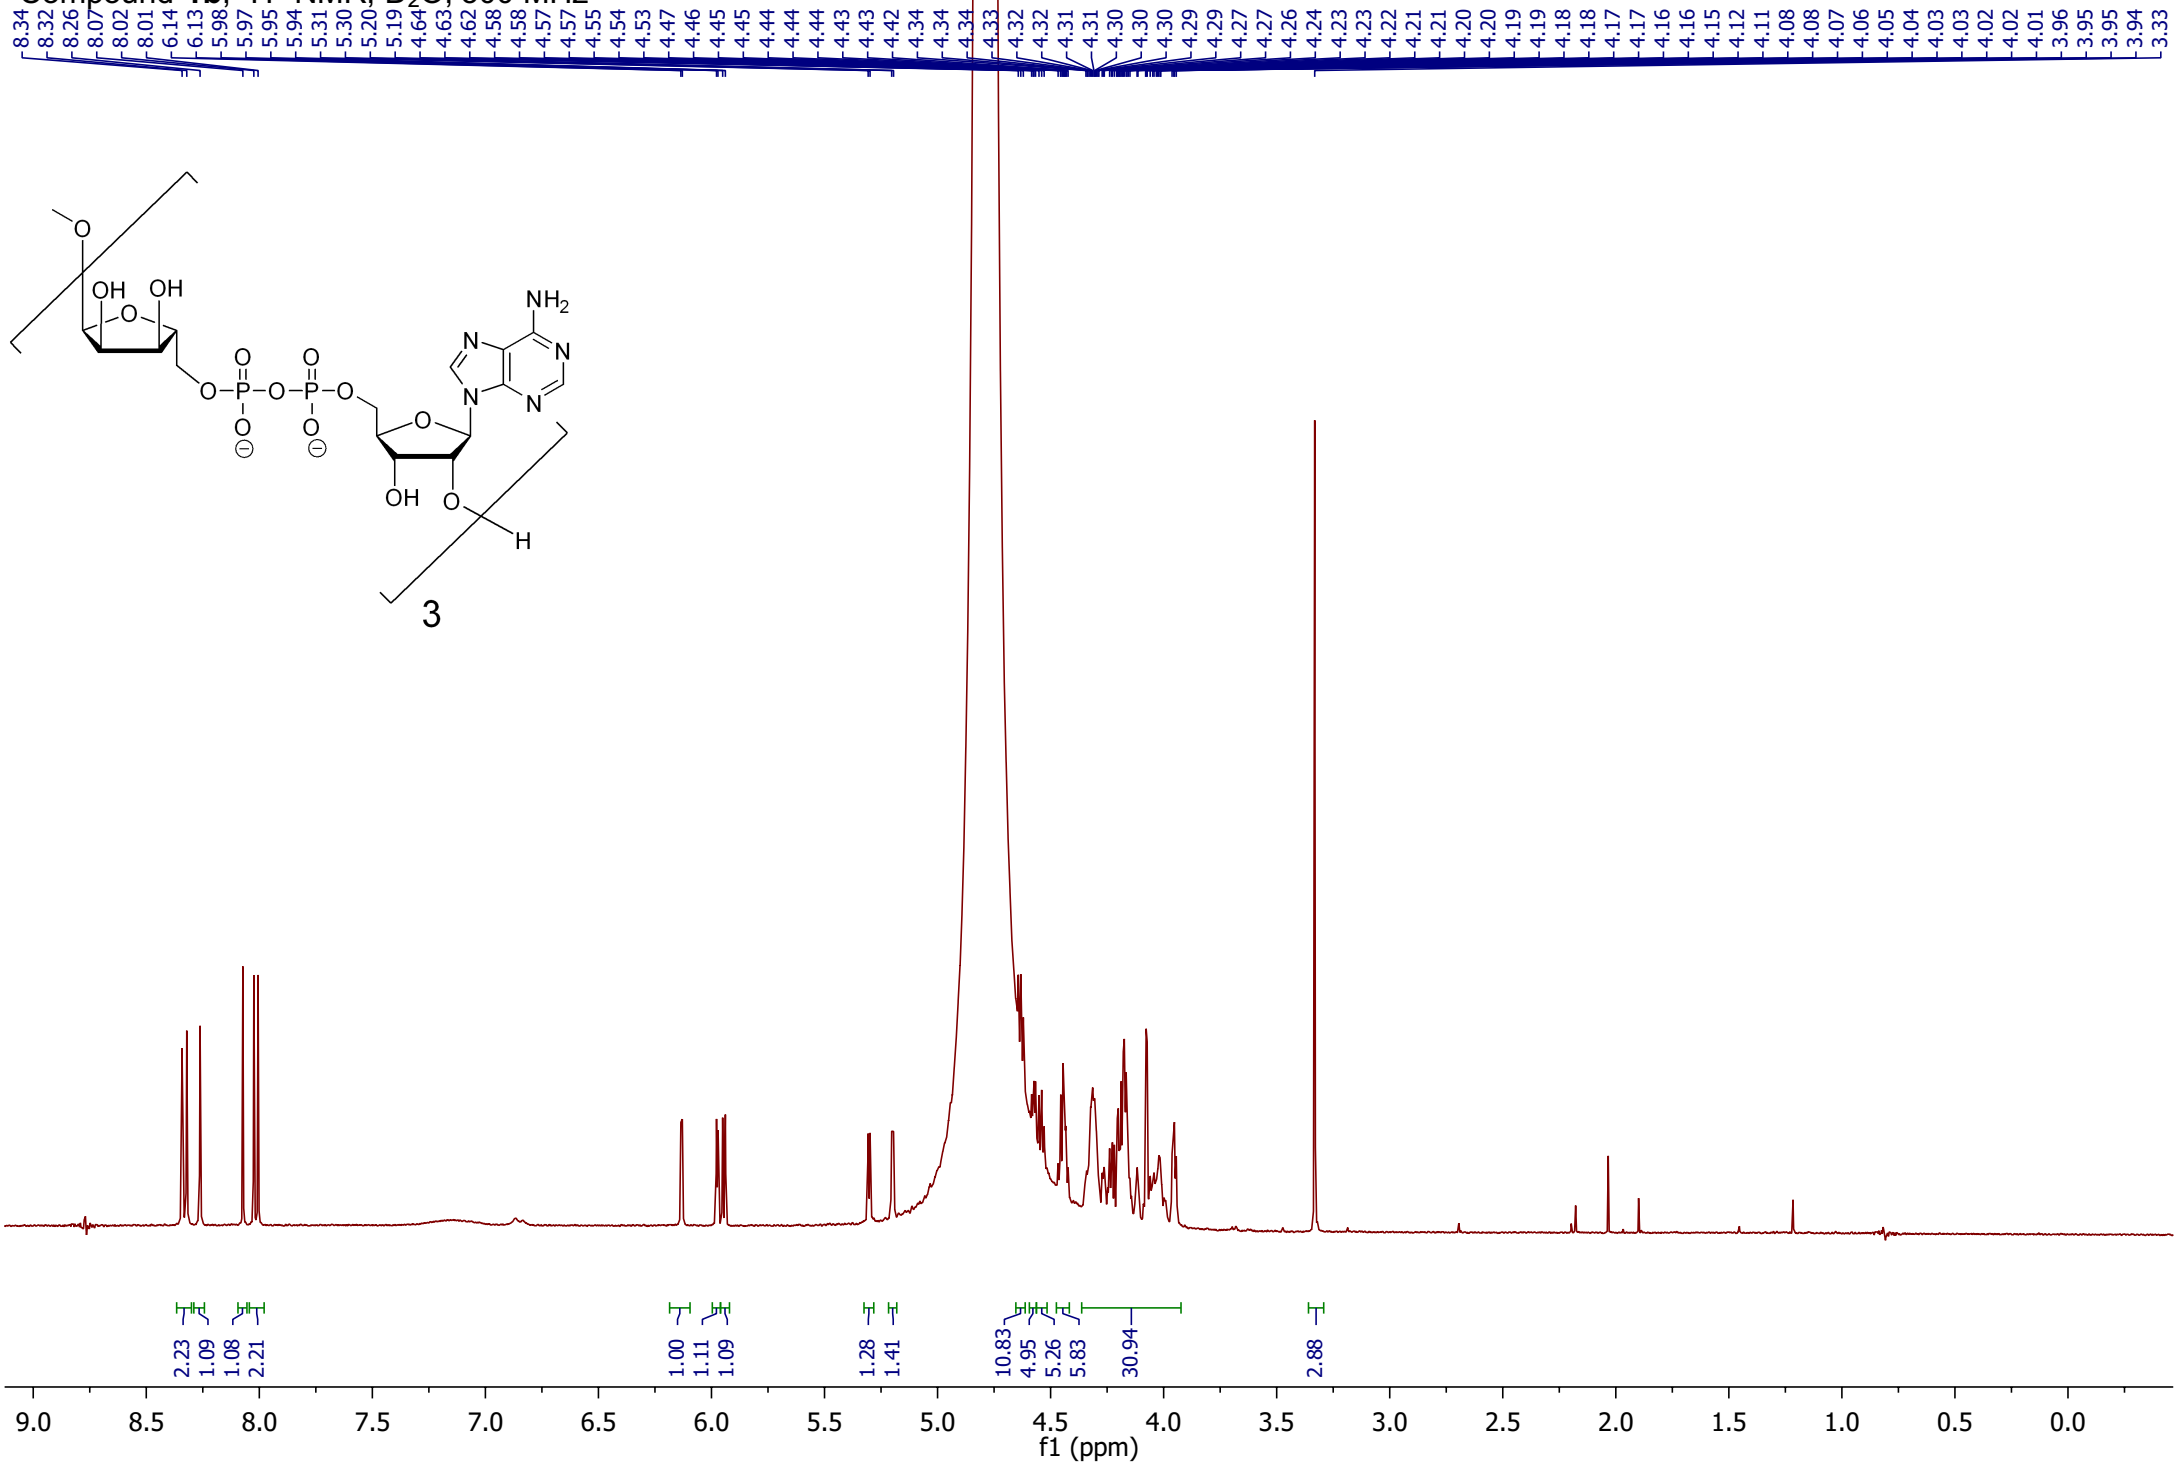

Compound **1b**,  $^1\text{H}$ -NMR,  $\text{D}_2\text{O}$ ,  $\text{H}_2\text{O}$  suppression, 500 MHz

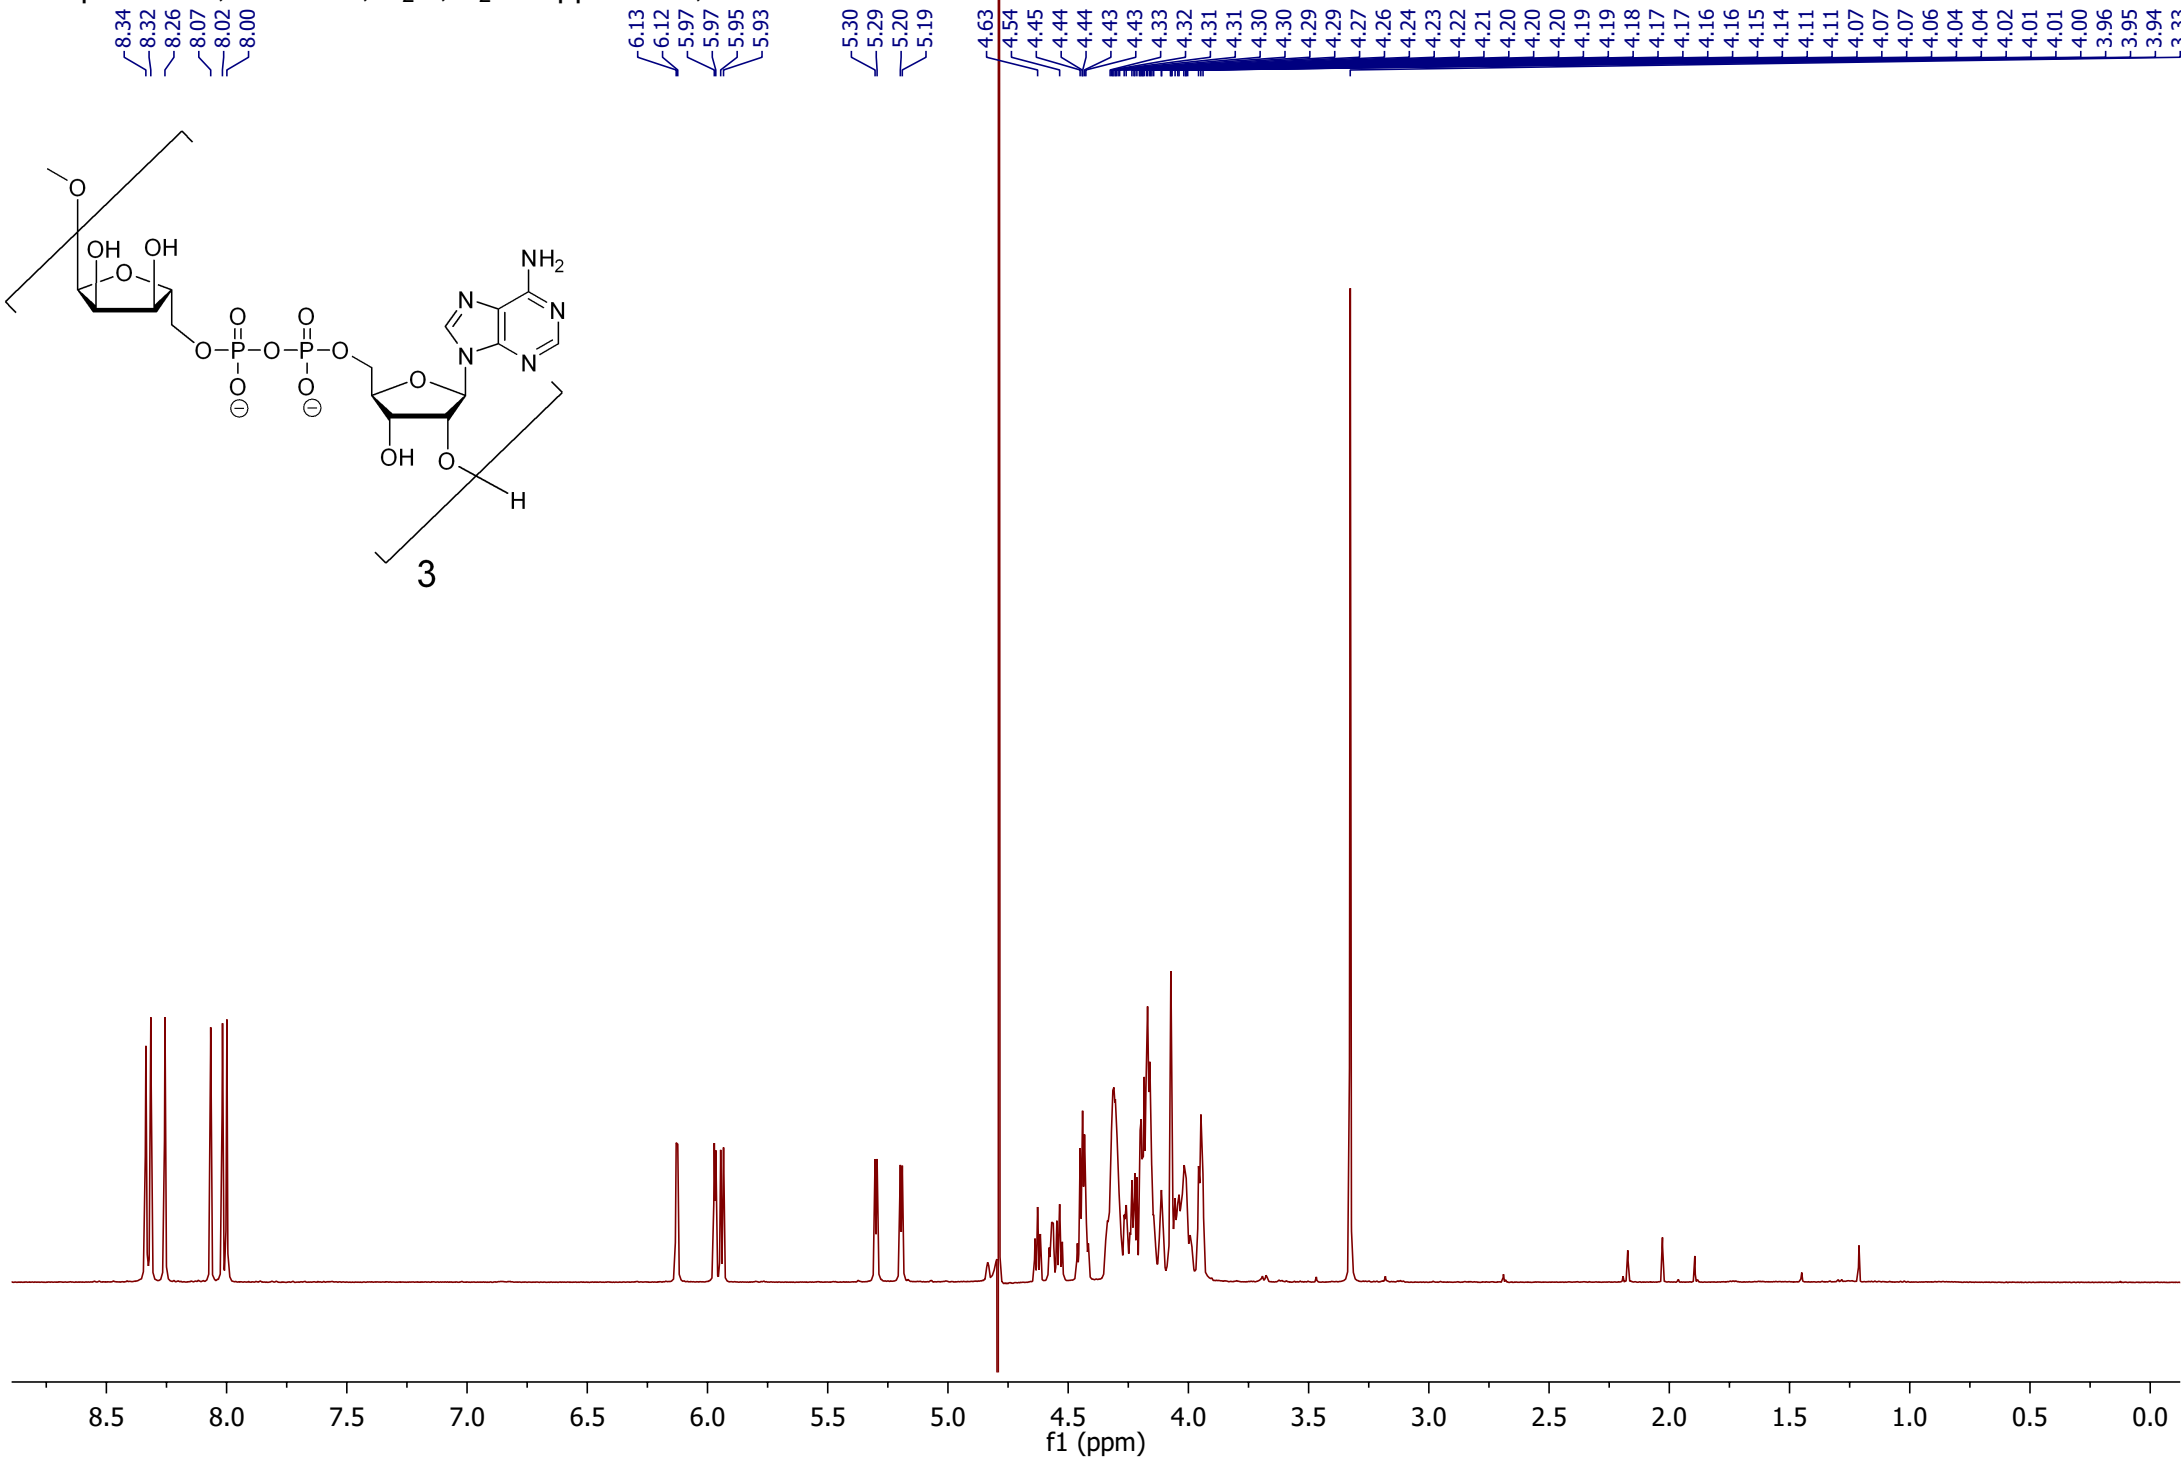



Compound **1b**,  $^{13}\text{C}$ -NMR,  $\text{D}_2\text{O}$ , 214 MHz

155.66  
155.55  
155.45  
149.44  
149.14  
148.84

119.28  
119.11  
119.00

104.13  
102.35  
102.24  
87.87  
87.71  
87.40  
85.18  
85.14  
85.10  
84.82  
84.78  
84.09  
84.05  
84.01  
83.96  
83.81  
83.78  
80.26  
79.69  
75.38  
72.33  
72.30  
71.70  
71.41  
70.82  
70.81  
70.80  
70.55  
70.05  
69.87  
66.50  
66.19  
65.51  
56.33  
56.32

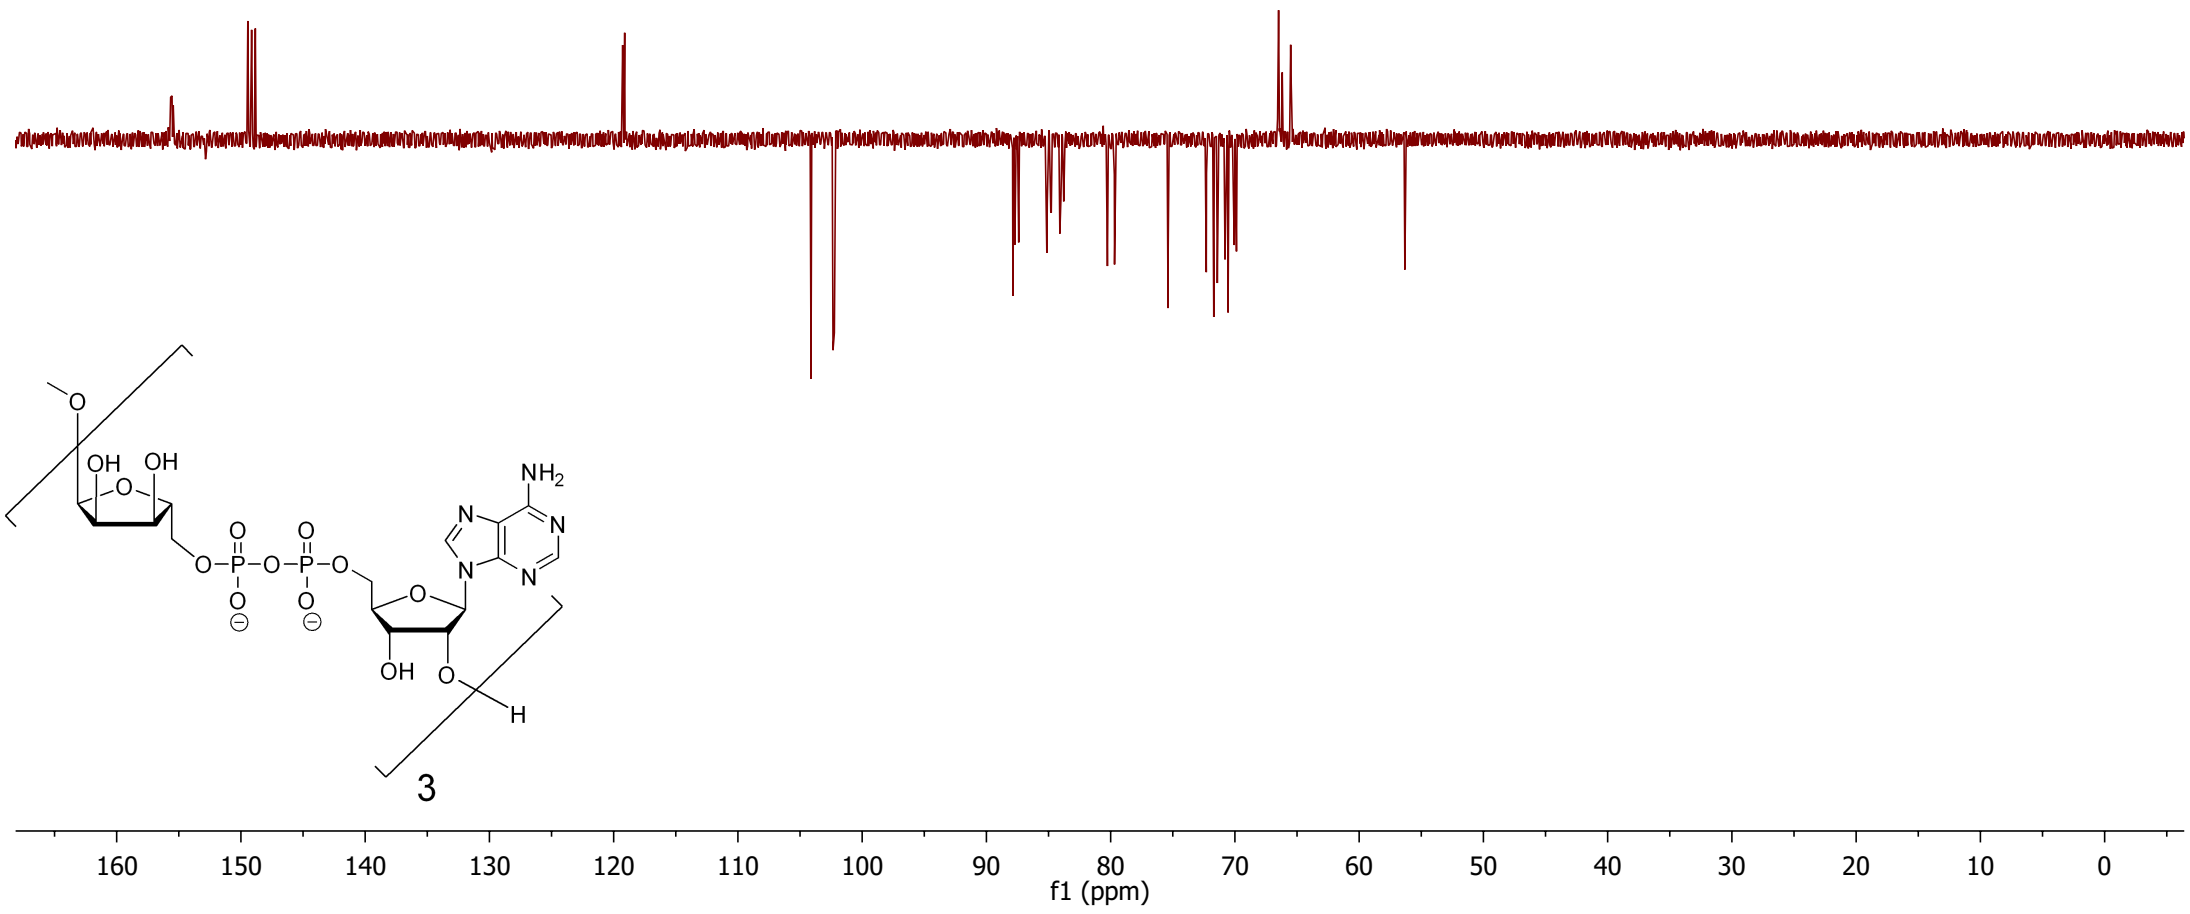

Compound **1b**,  $^{31}\text{P}$ -NMR,  $\text{D}_2\text{O}$ , 202 MHz

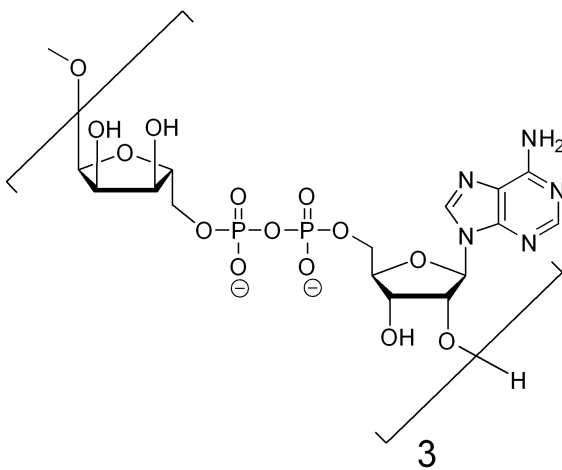

-10.45  
-10.51  
-10.55  
-10.61  
-10.67  
-10.69  
-10.71  
-10.78  
-10.80  
-10.82

-10.45  
-10.51  
-10.55  
-10.61  
-10.67  
-10.69  
-10.71  
-10.78  
-10.80  
-10.82

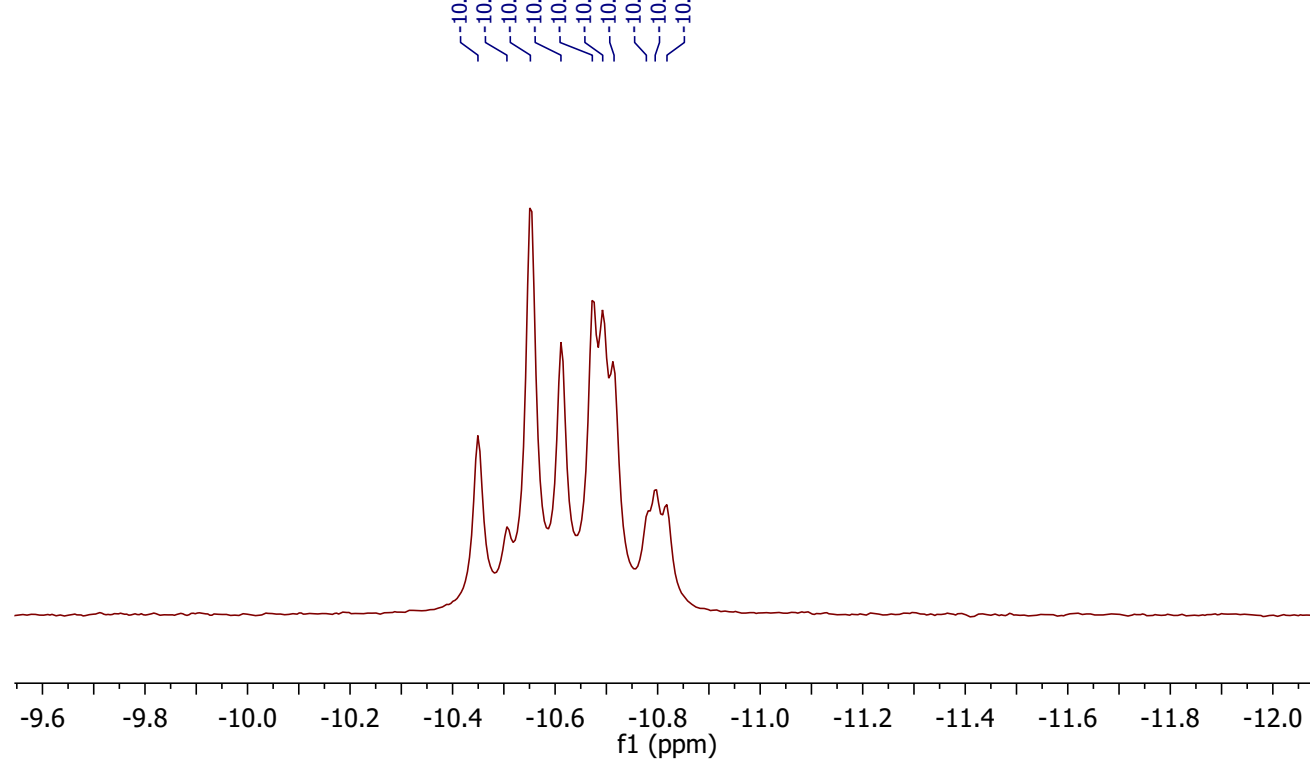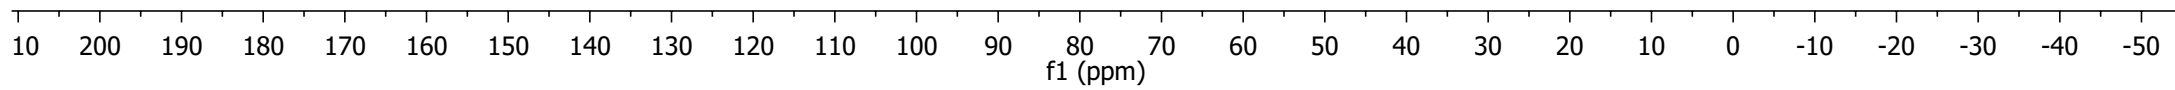

Compound **1b**, COSY, D<sub>2</sub>O, 850 MHz

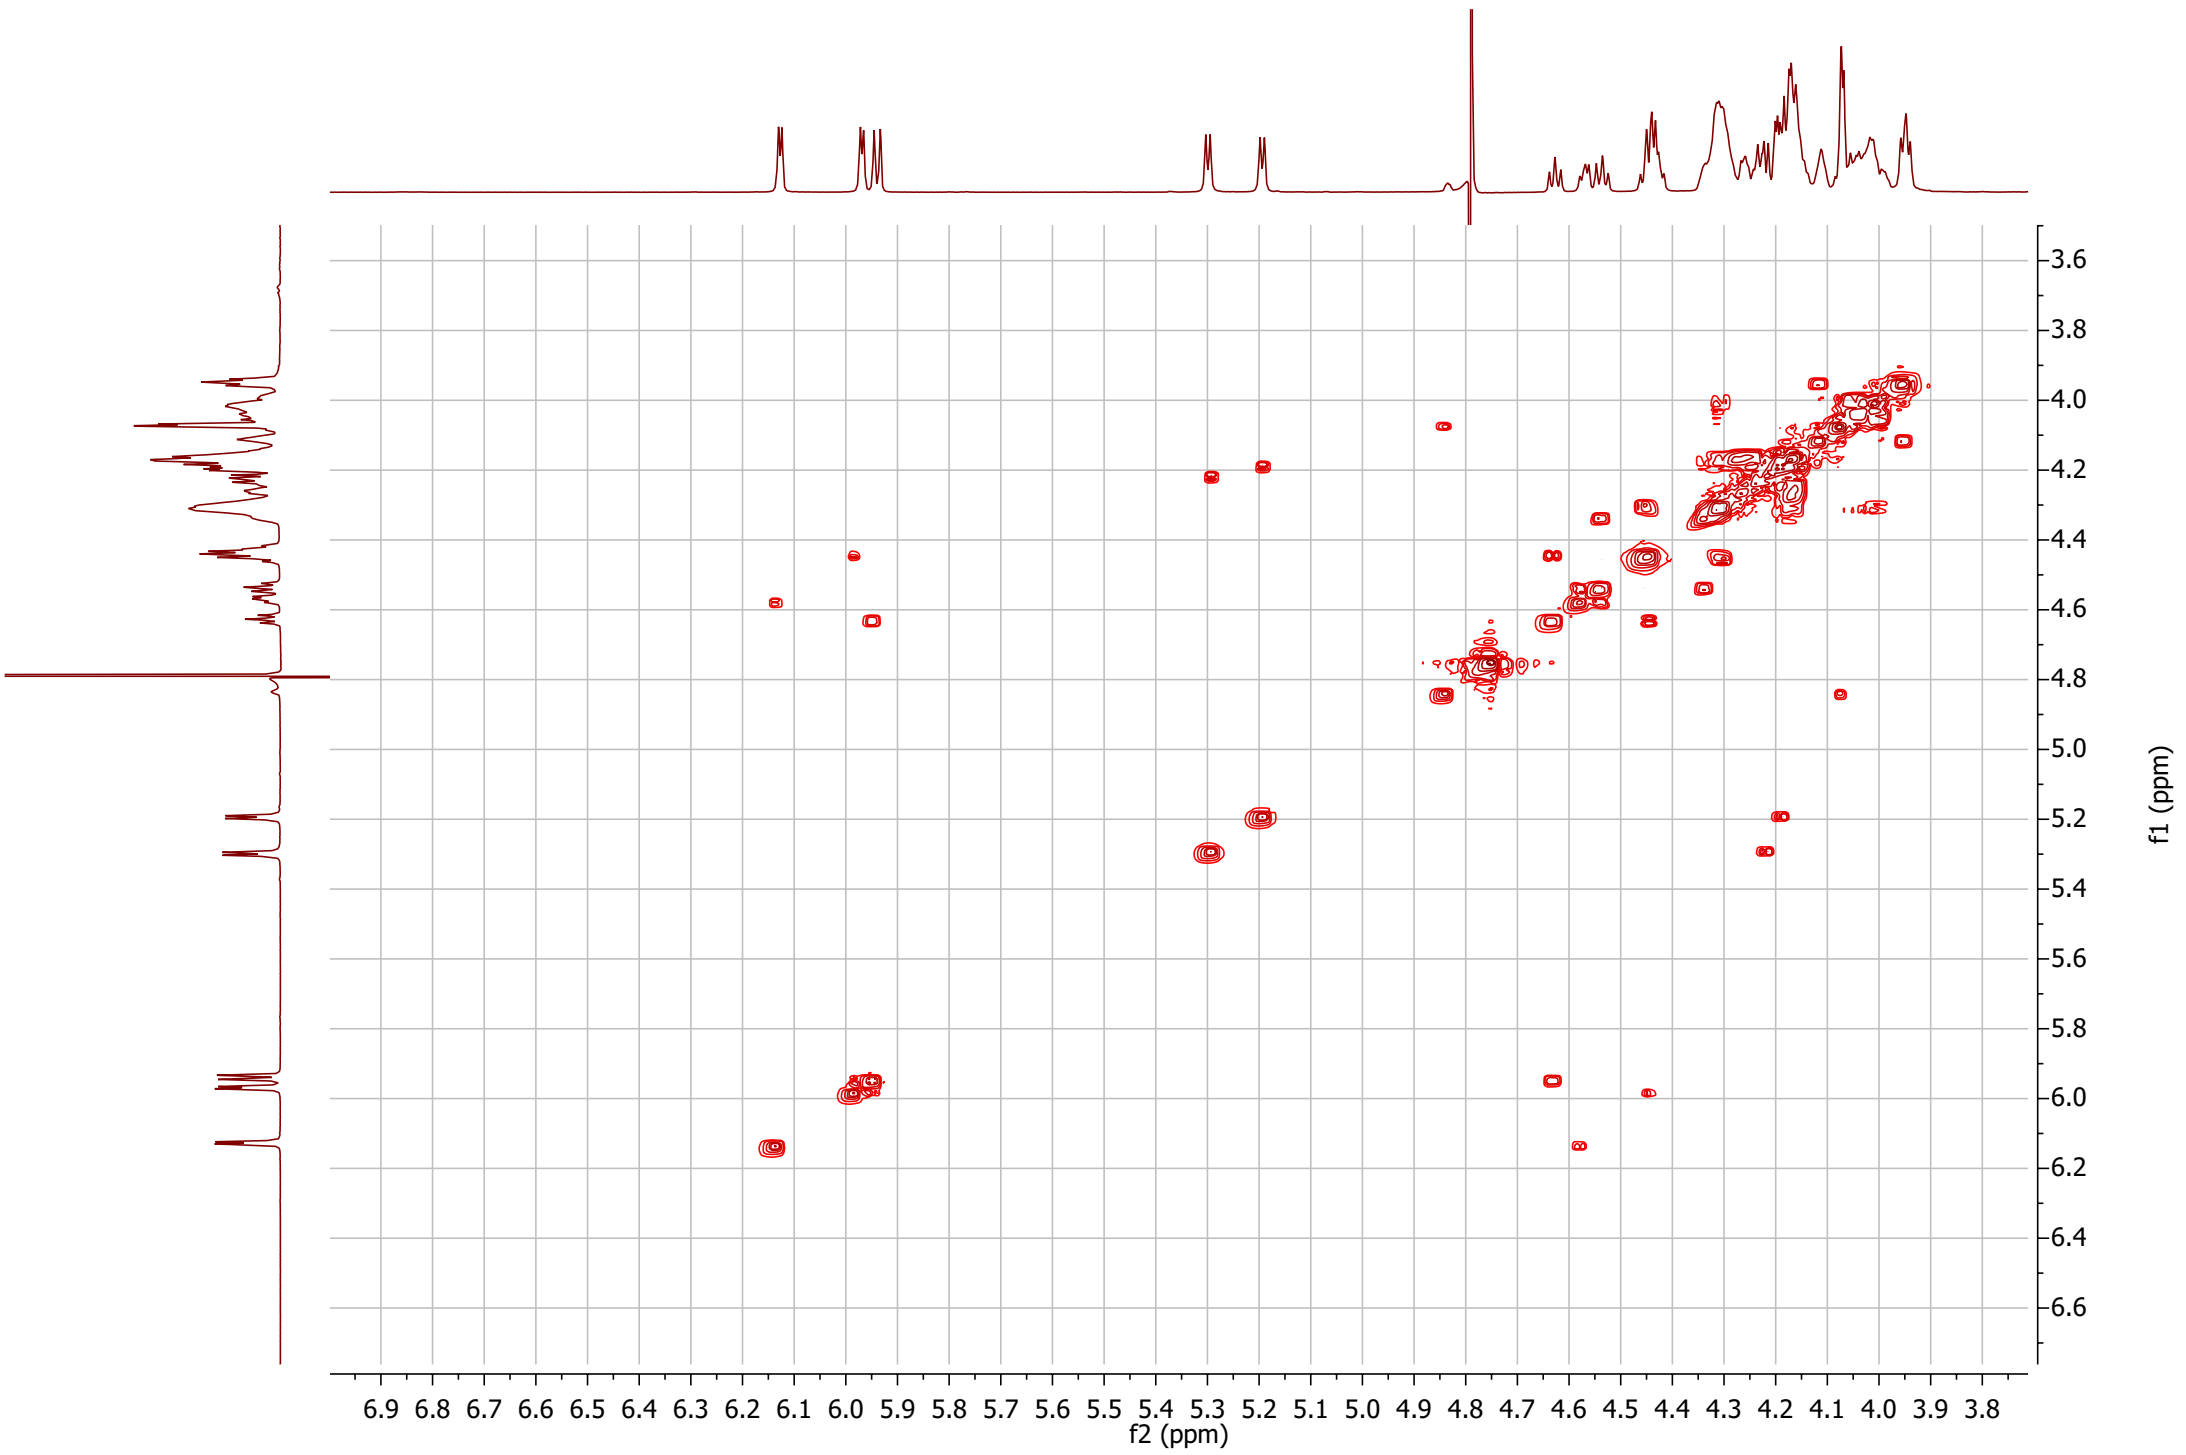

Compound **1b**, HSQC, D<sub>2</sub>O, 850 MHz

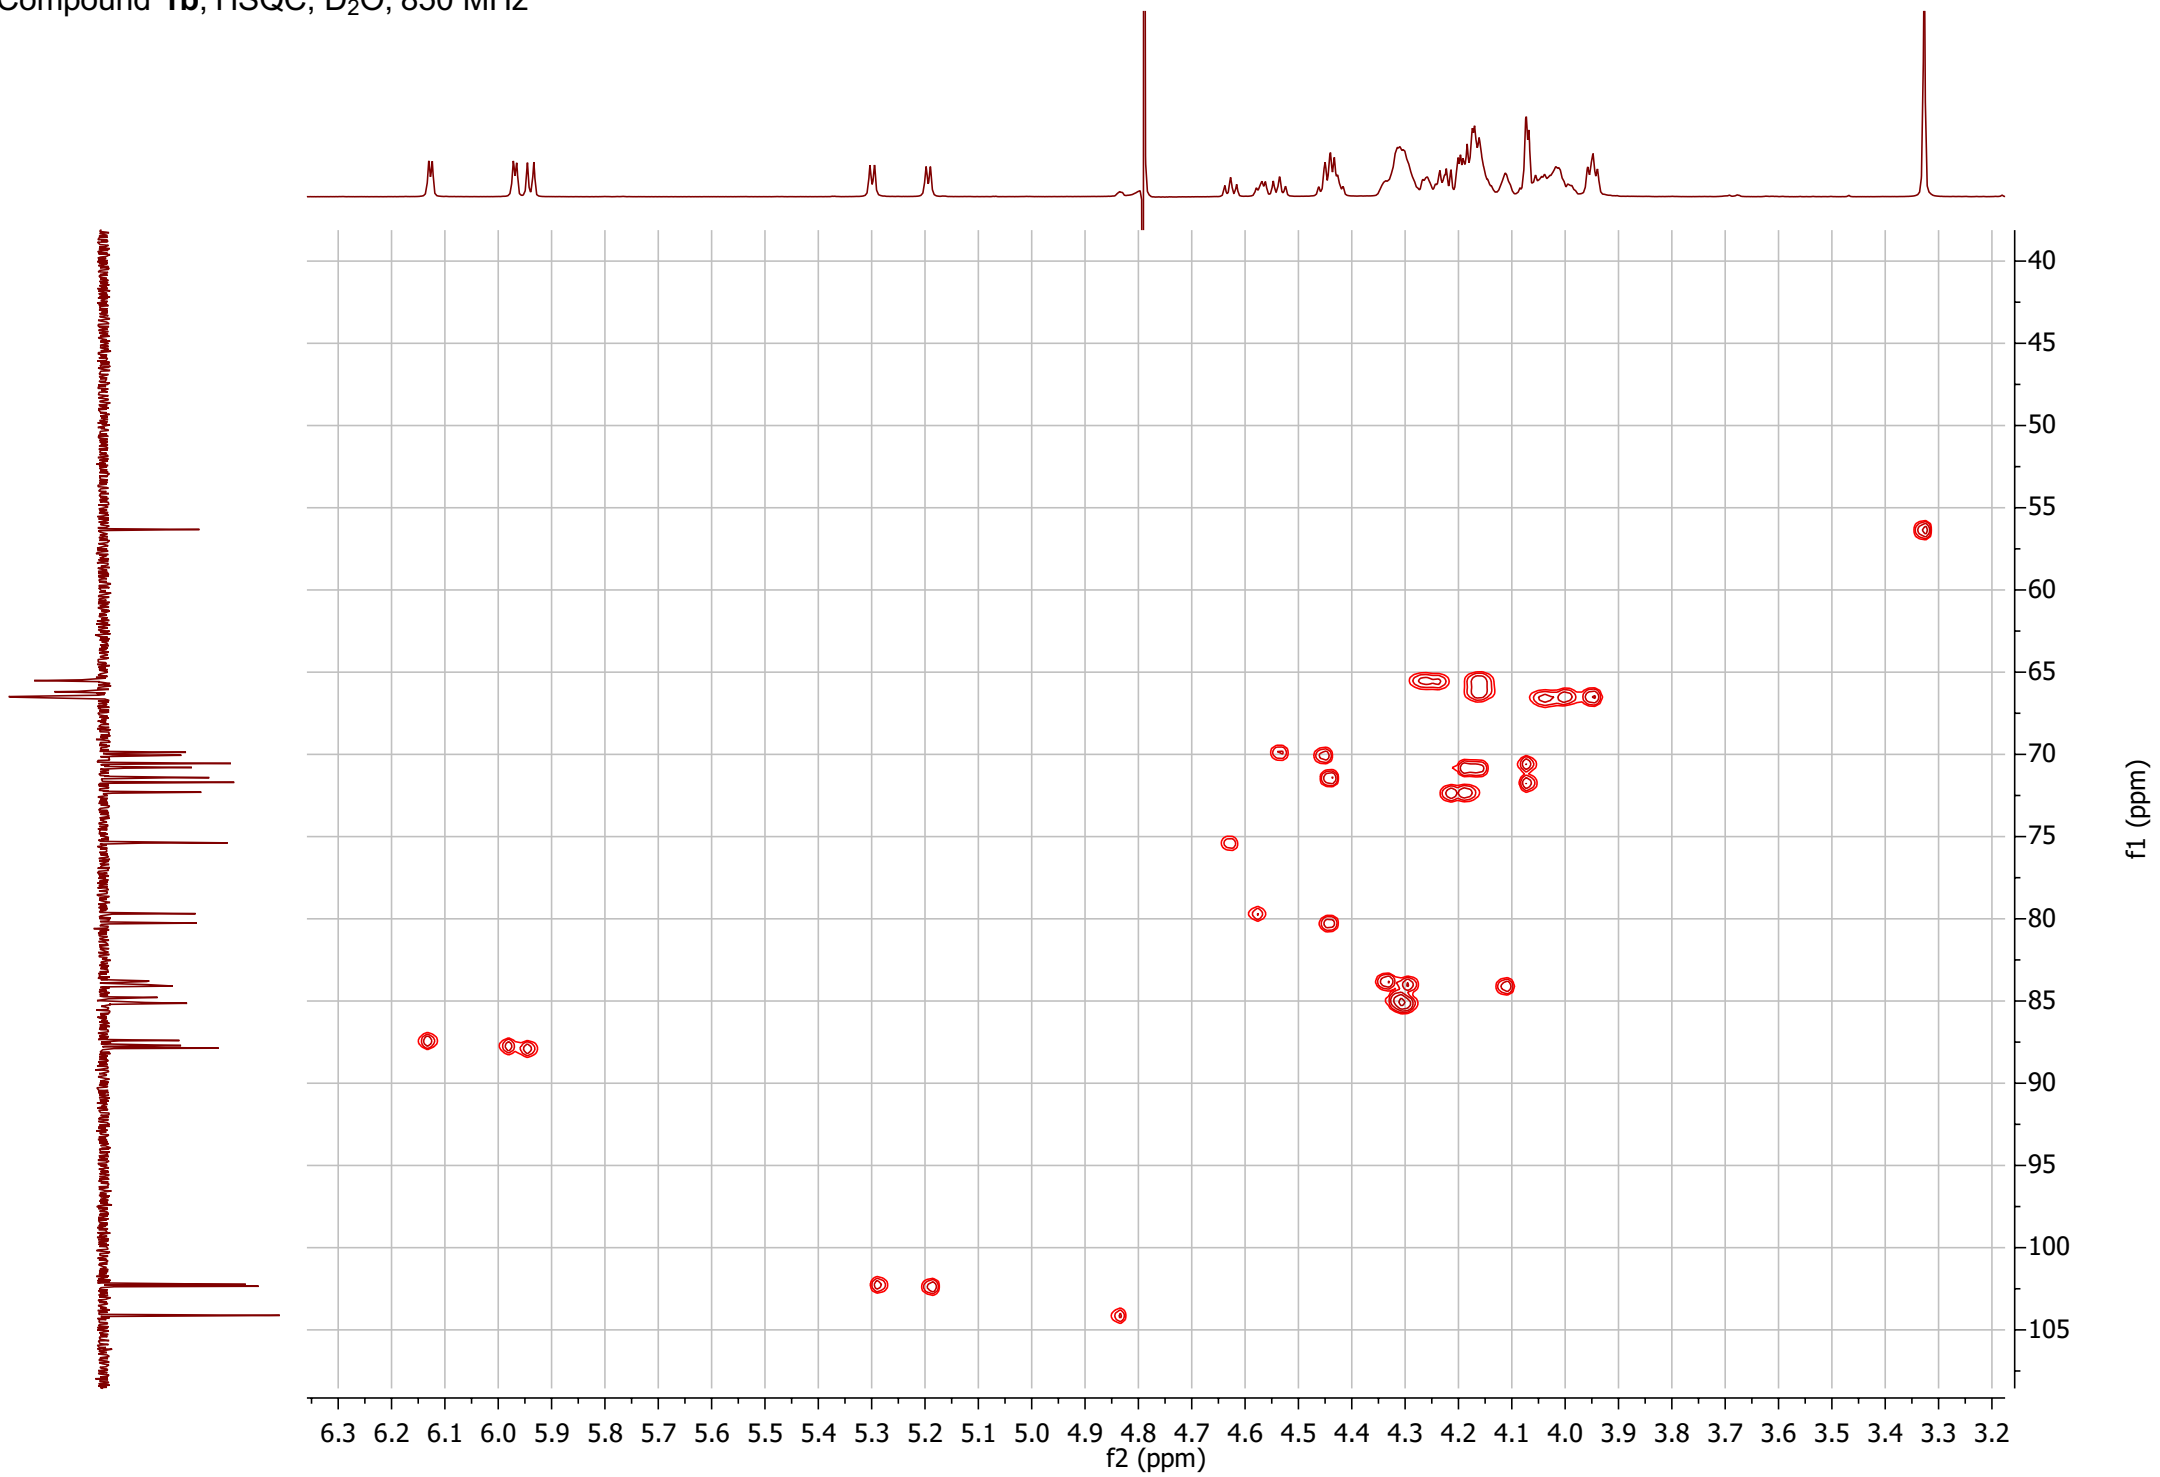

Compound **1c**, <sup>1</sup>H-NMR, D<sub>2</sub>O, 850 MHz

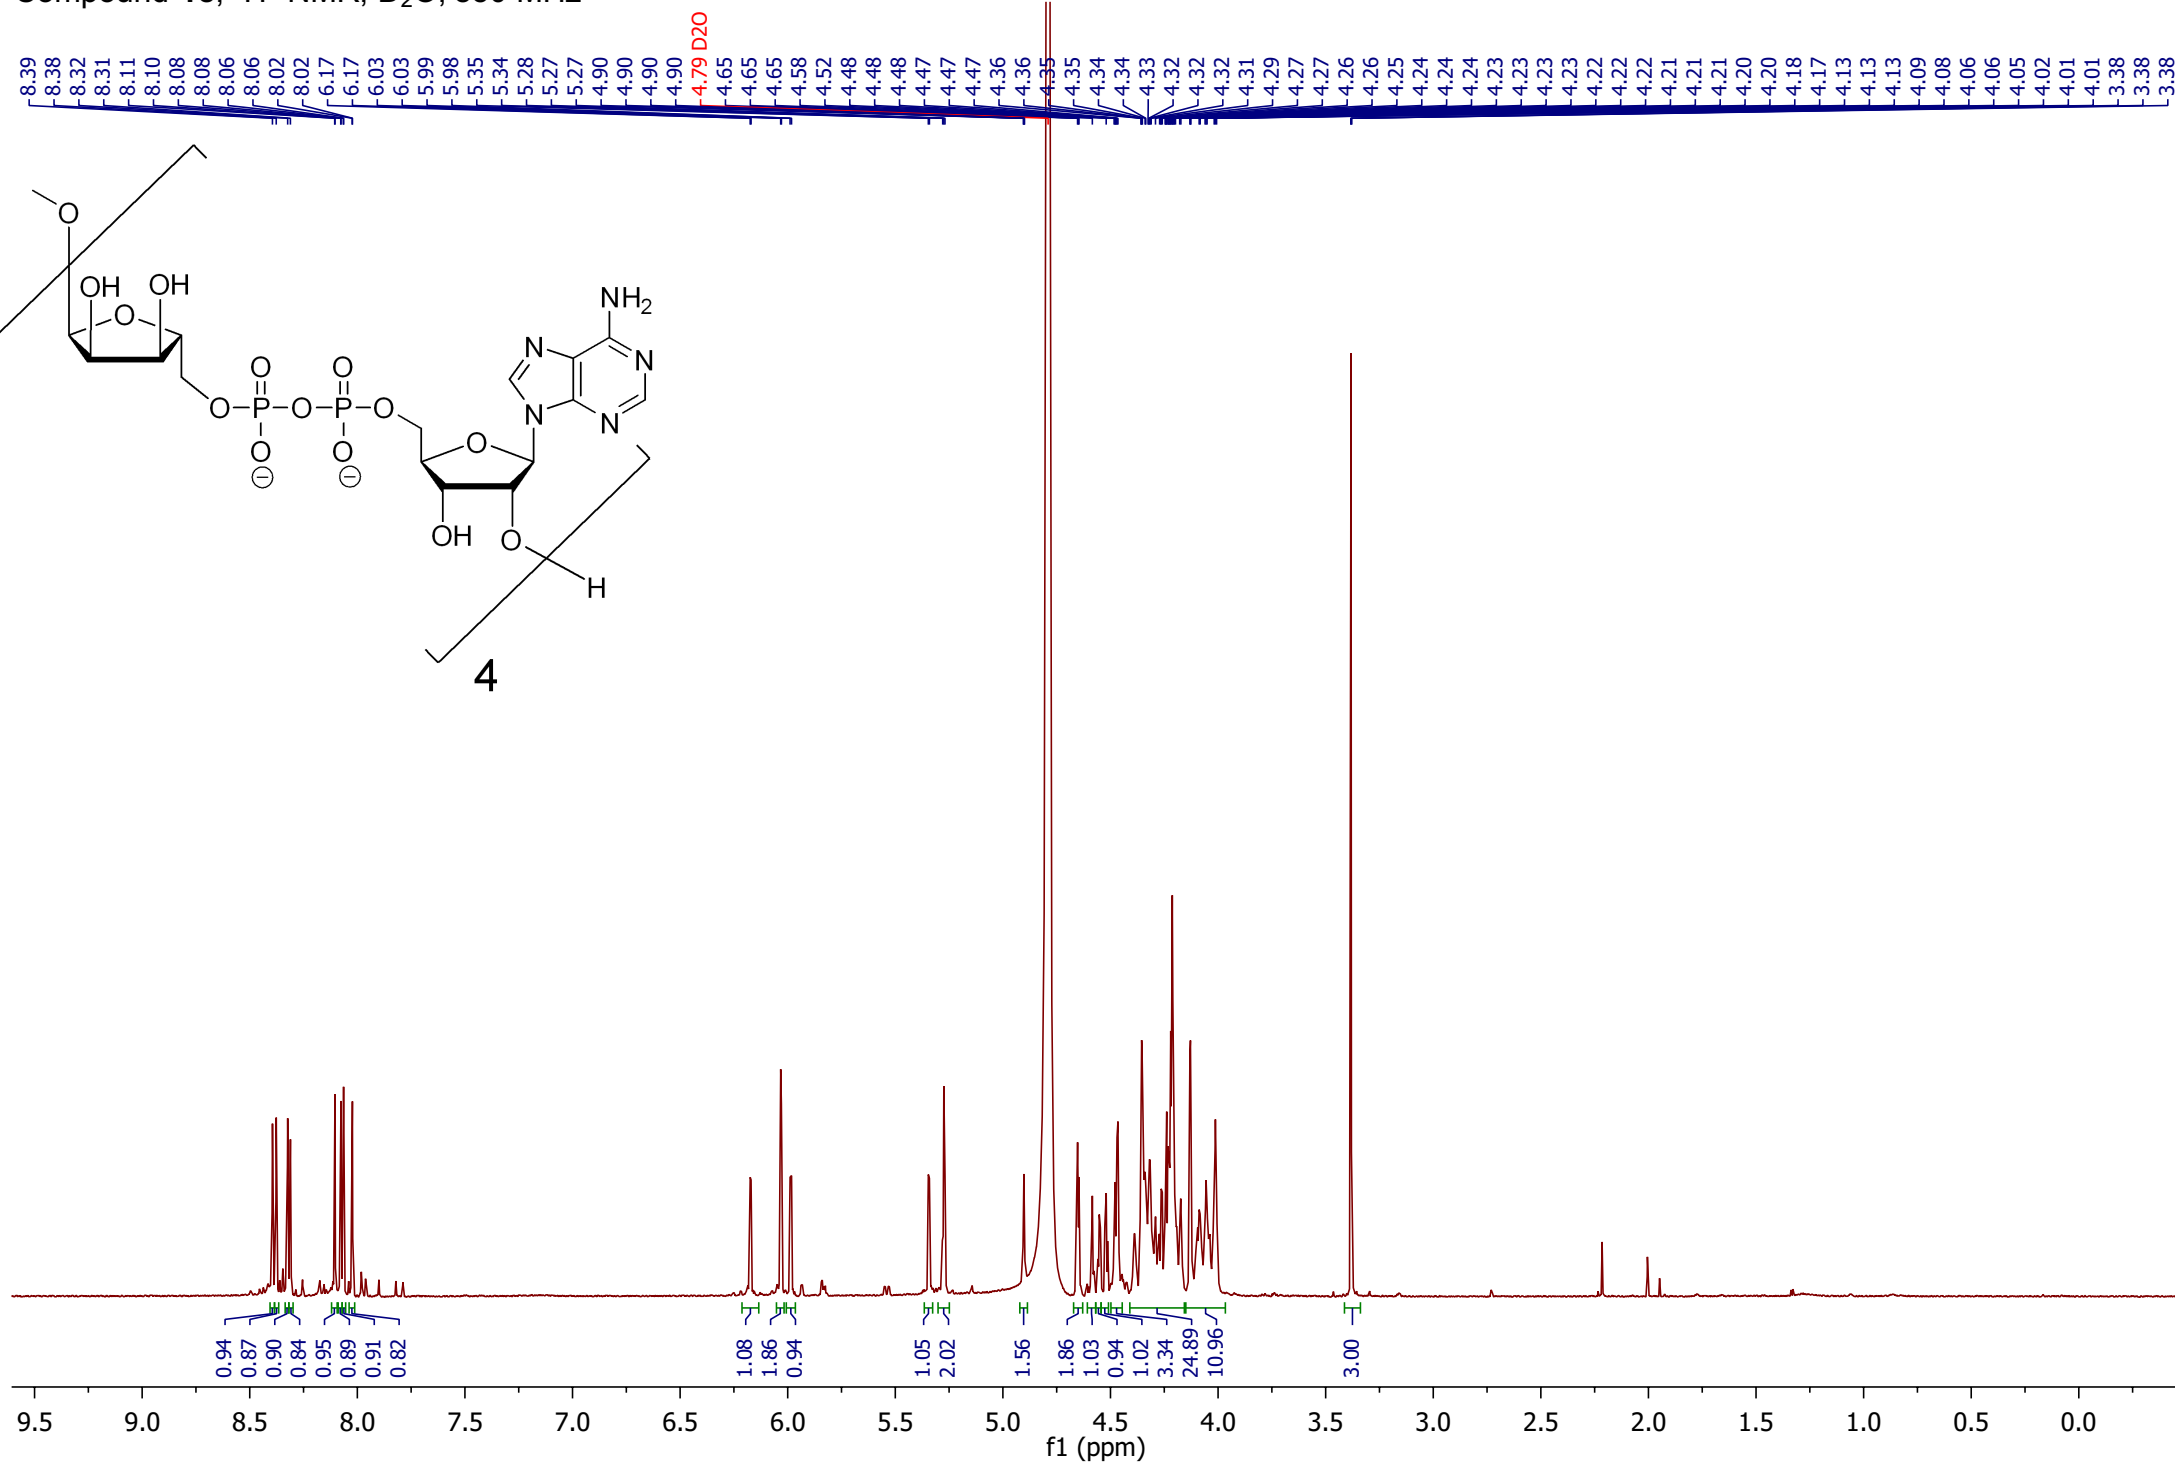

Compound **1c**,  $^1\text{H}$ -NMR,  $\text{D}_2\text{O}$ ,  $\text{H}_2\text{O}$  suppression, 850 MHz

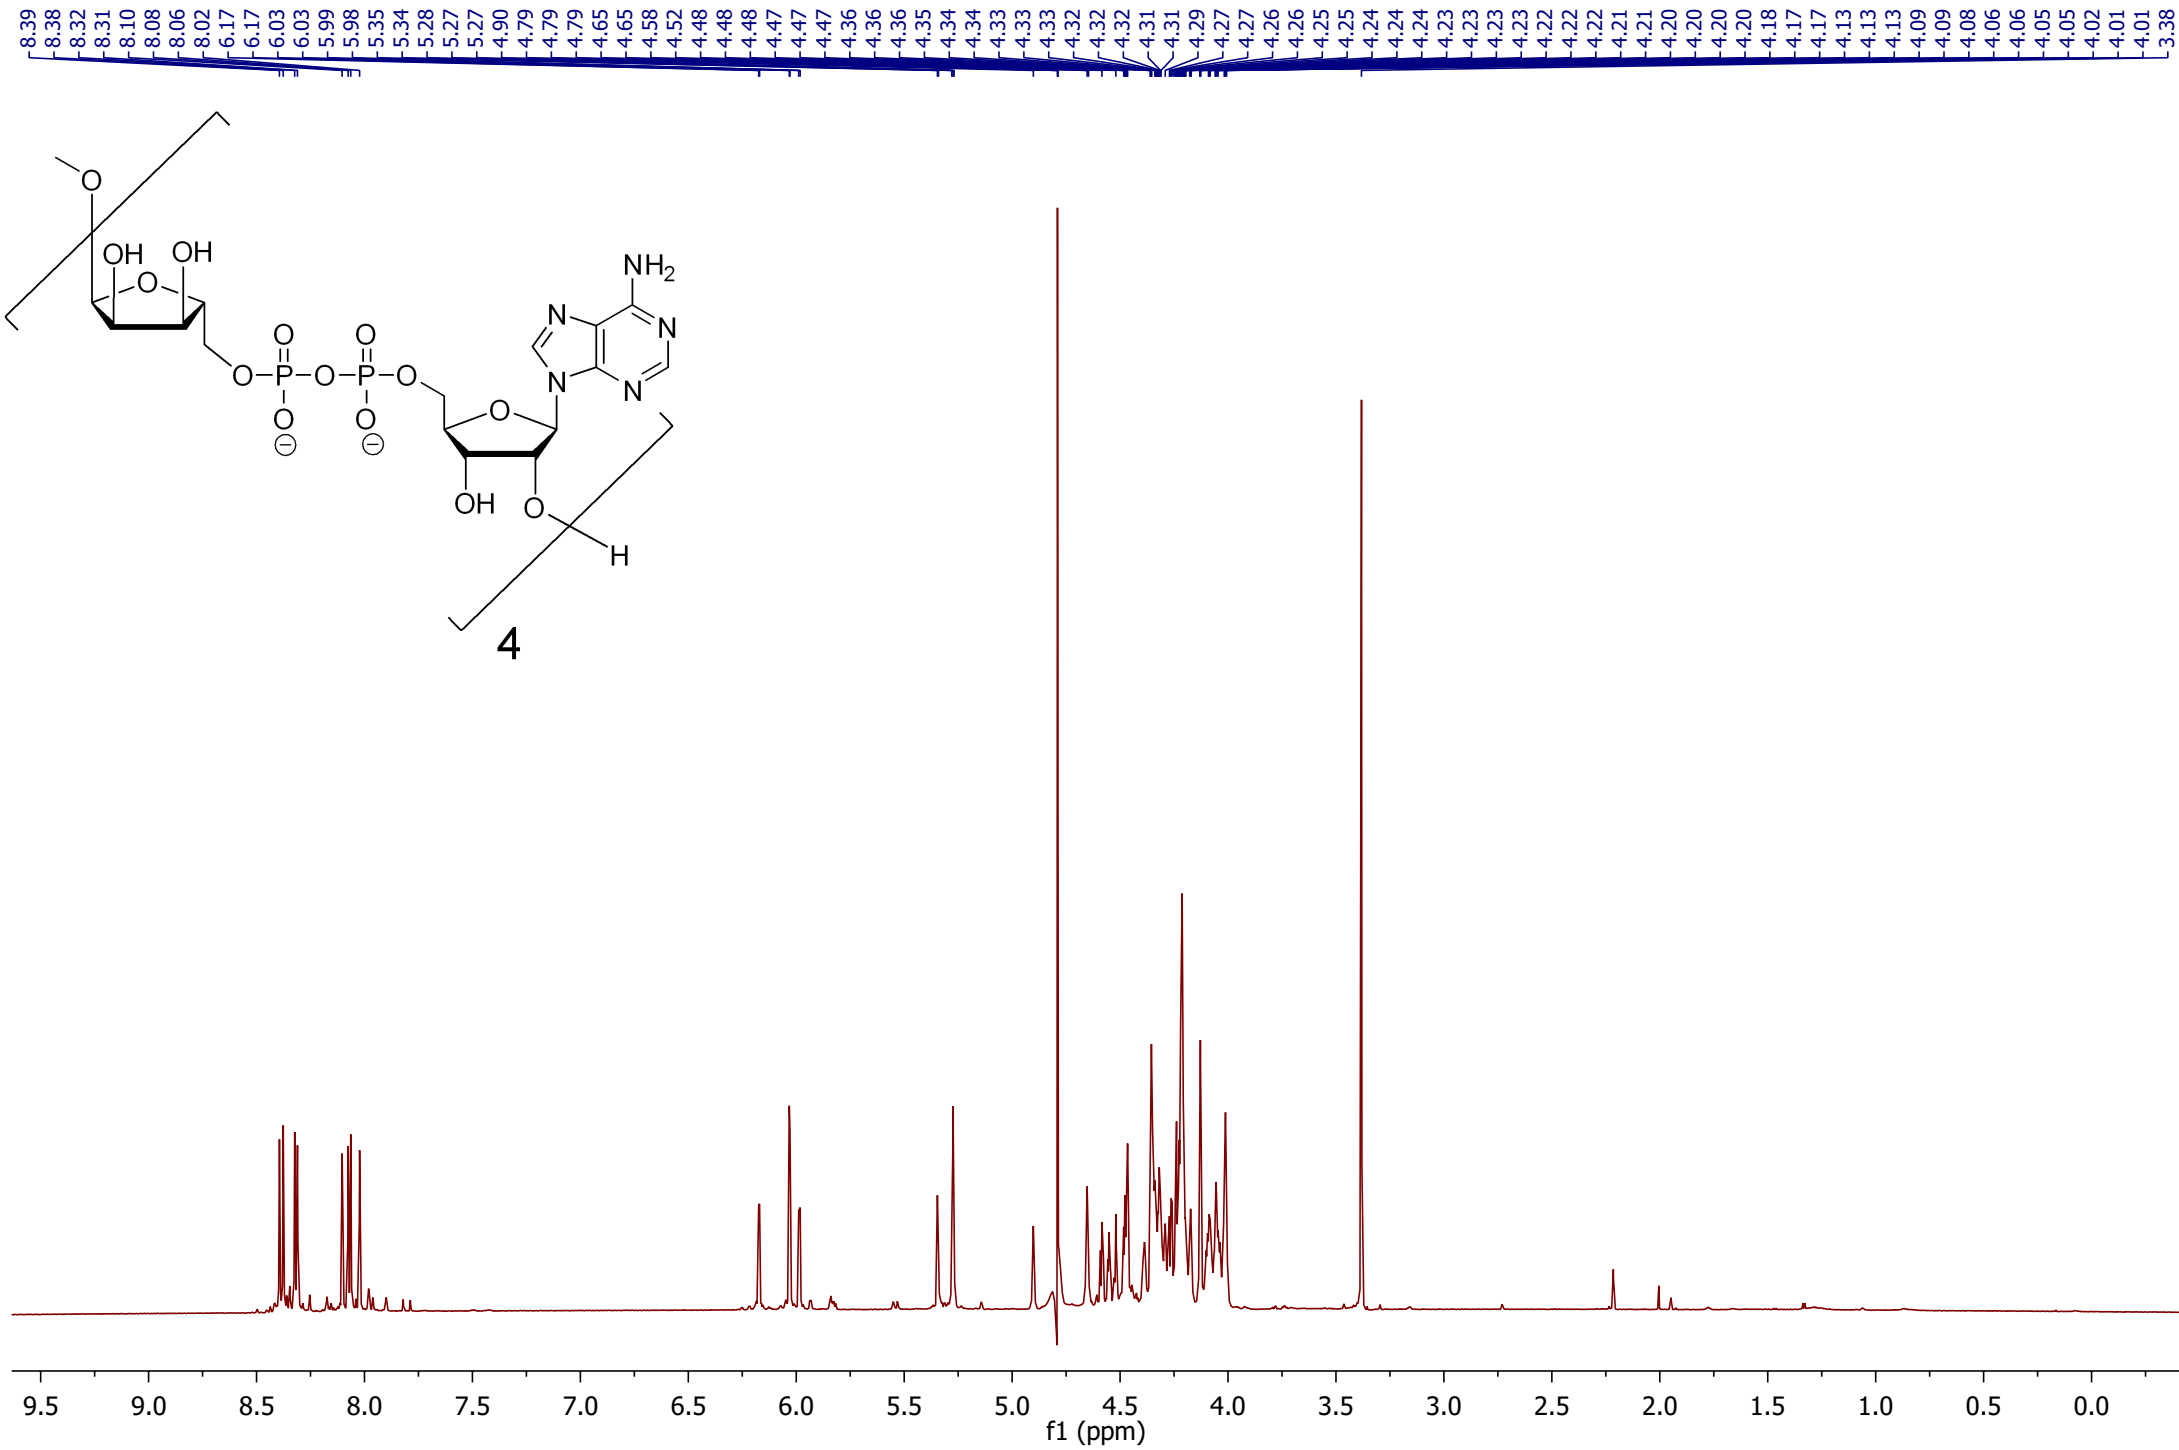

Compound **1c**,  $^{31}\text{P}$ -NMR,  $\text{D}_2\text{O}$ , 202 MHz

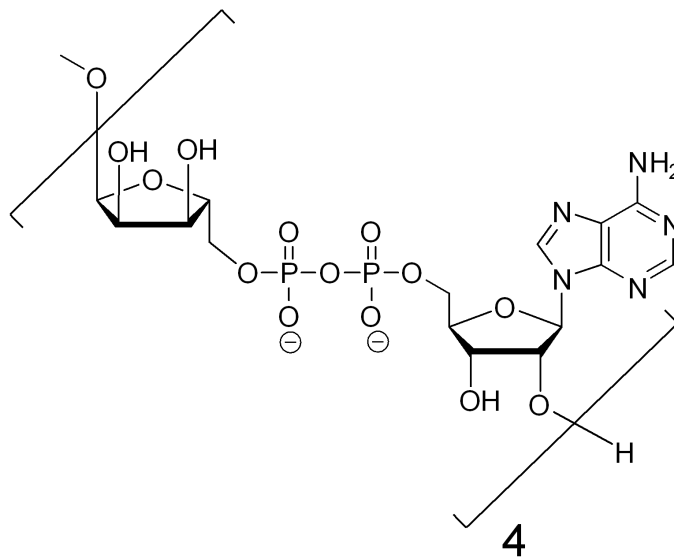

-11.10  
-11.21  
-11.24  
-11.31  
-11.34  
-11.43  
-11.47

-11.10  
-11.21  
-11.24  
-11.31  
-11.34  
-11.43  
-11.47

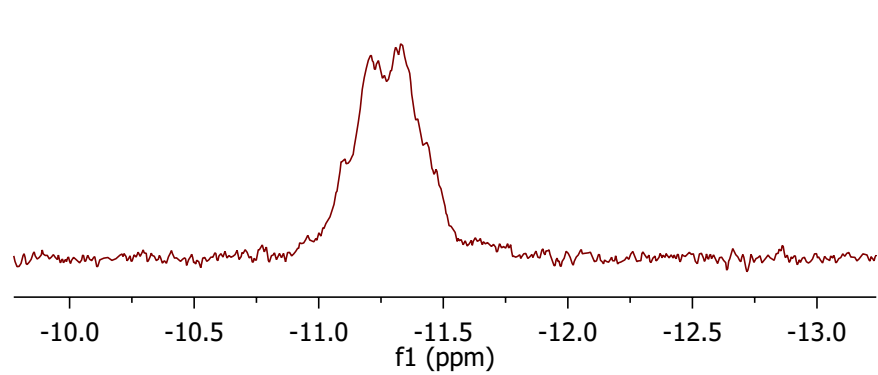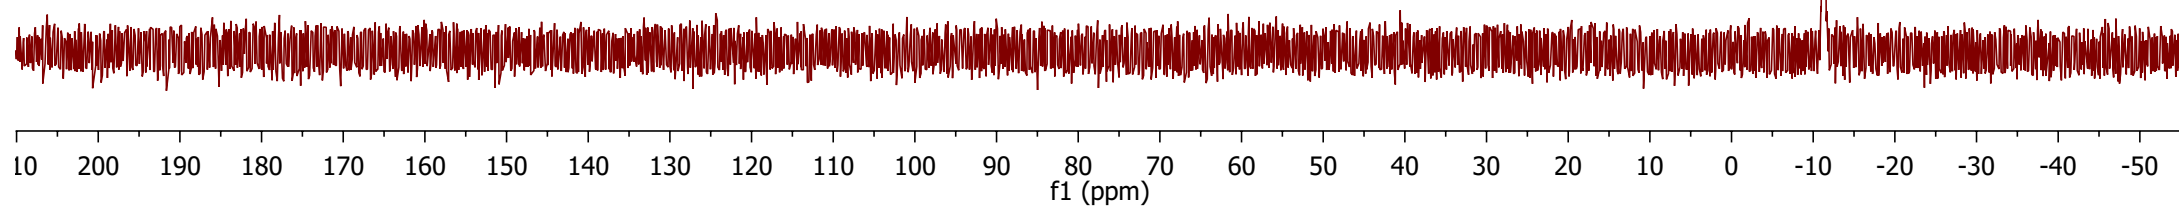

Compound **1c**, COSY, D<sub>2</sub>O, 850 MHz

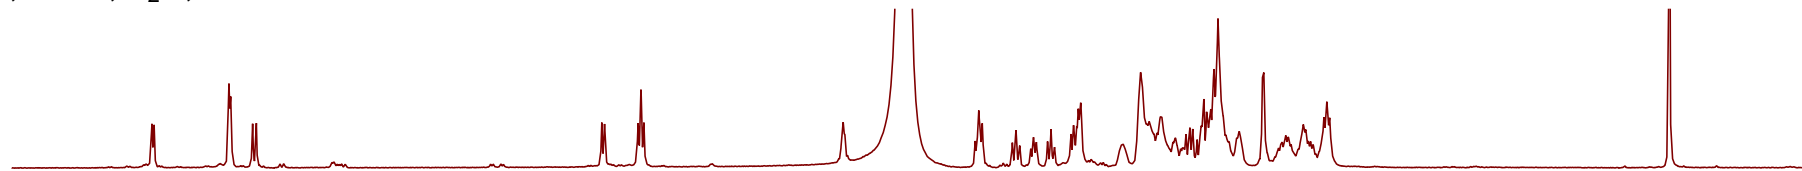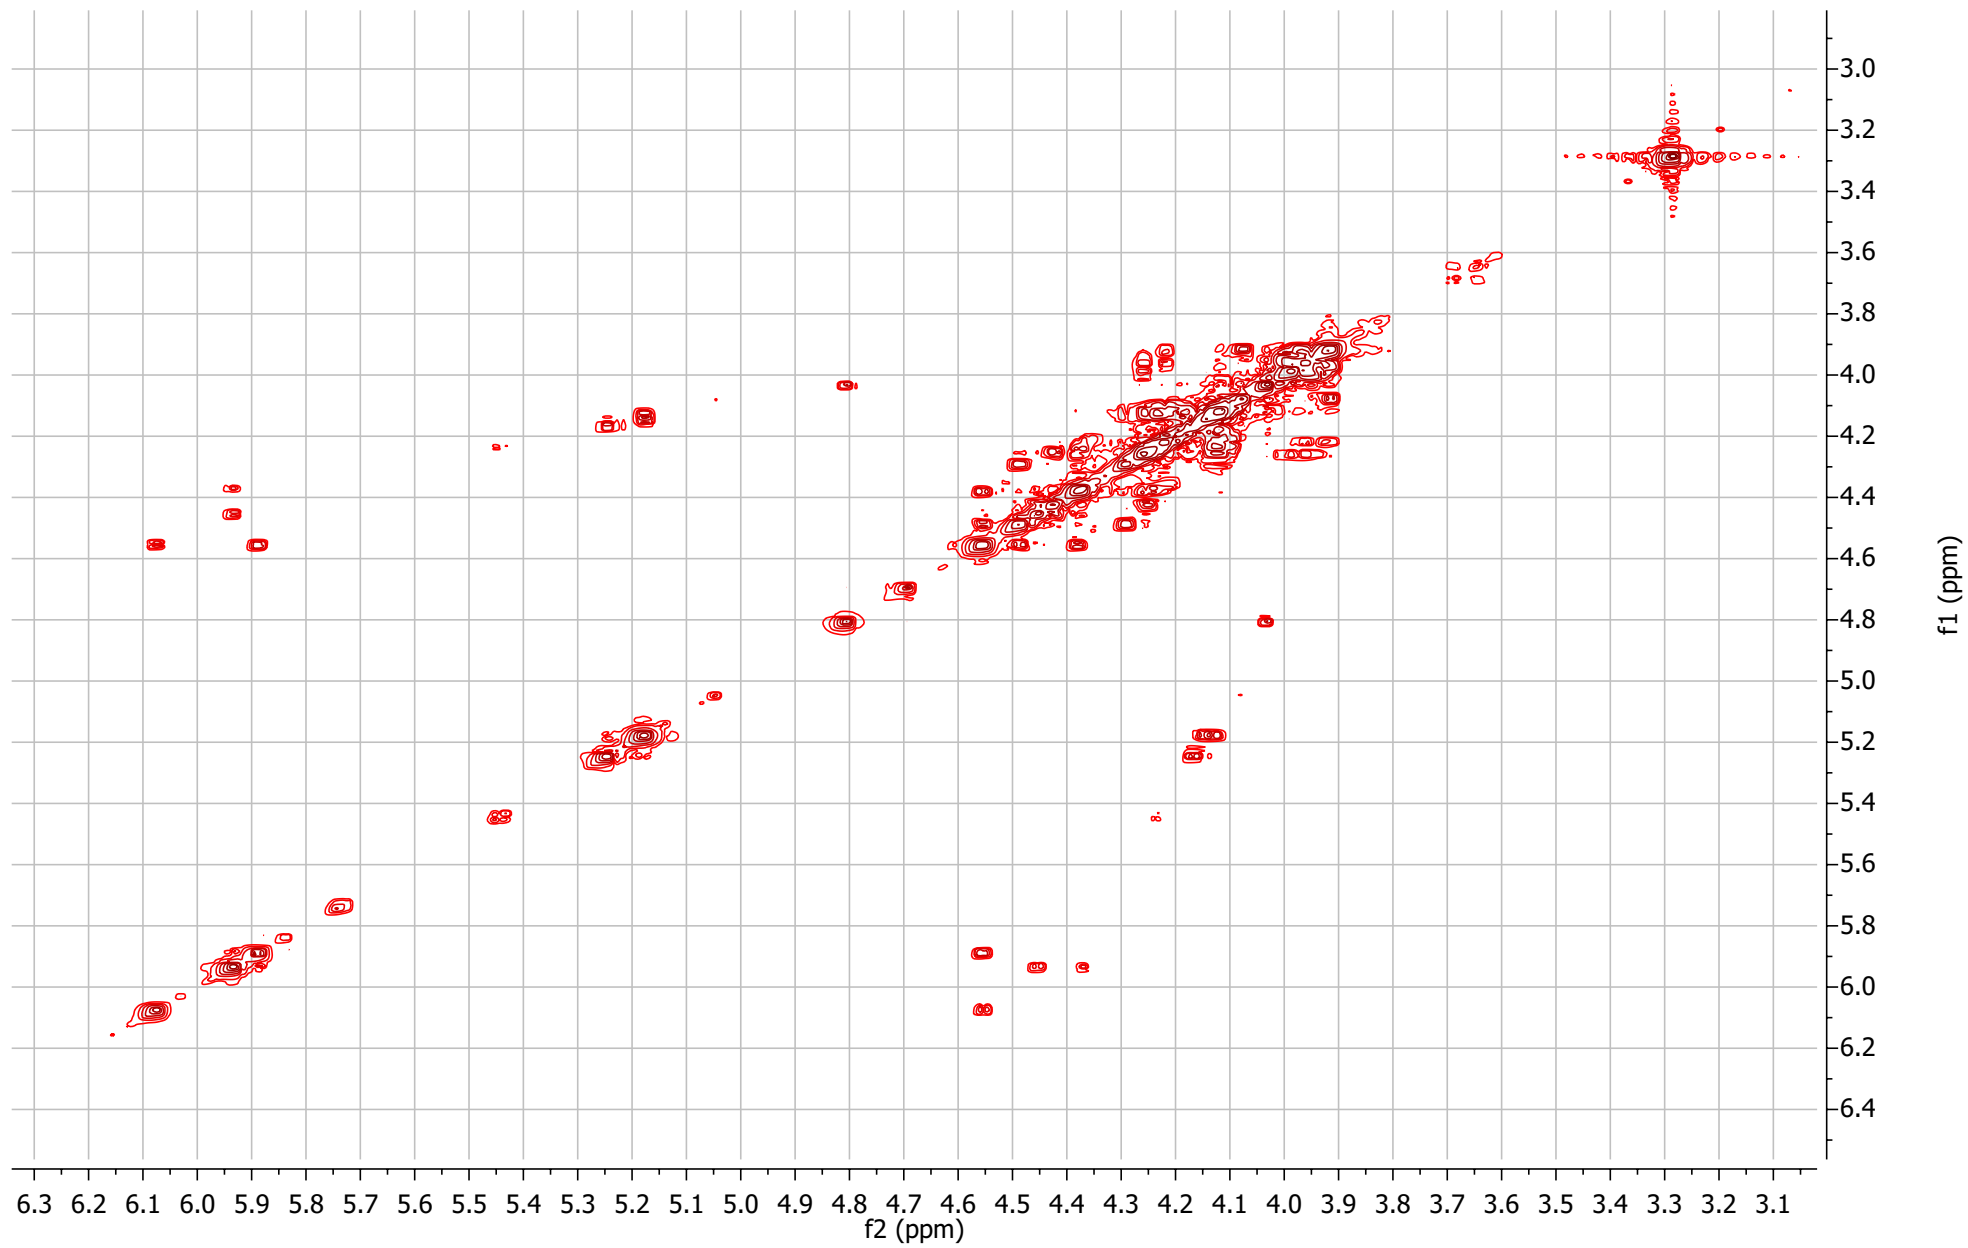



Compound **1d**, <sup>1</sup>H-NMR, D<sub>2</sub>O, 850 MHz

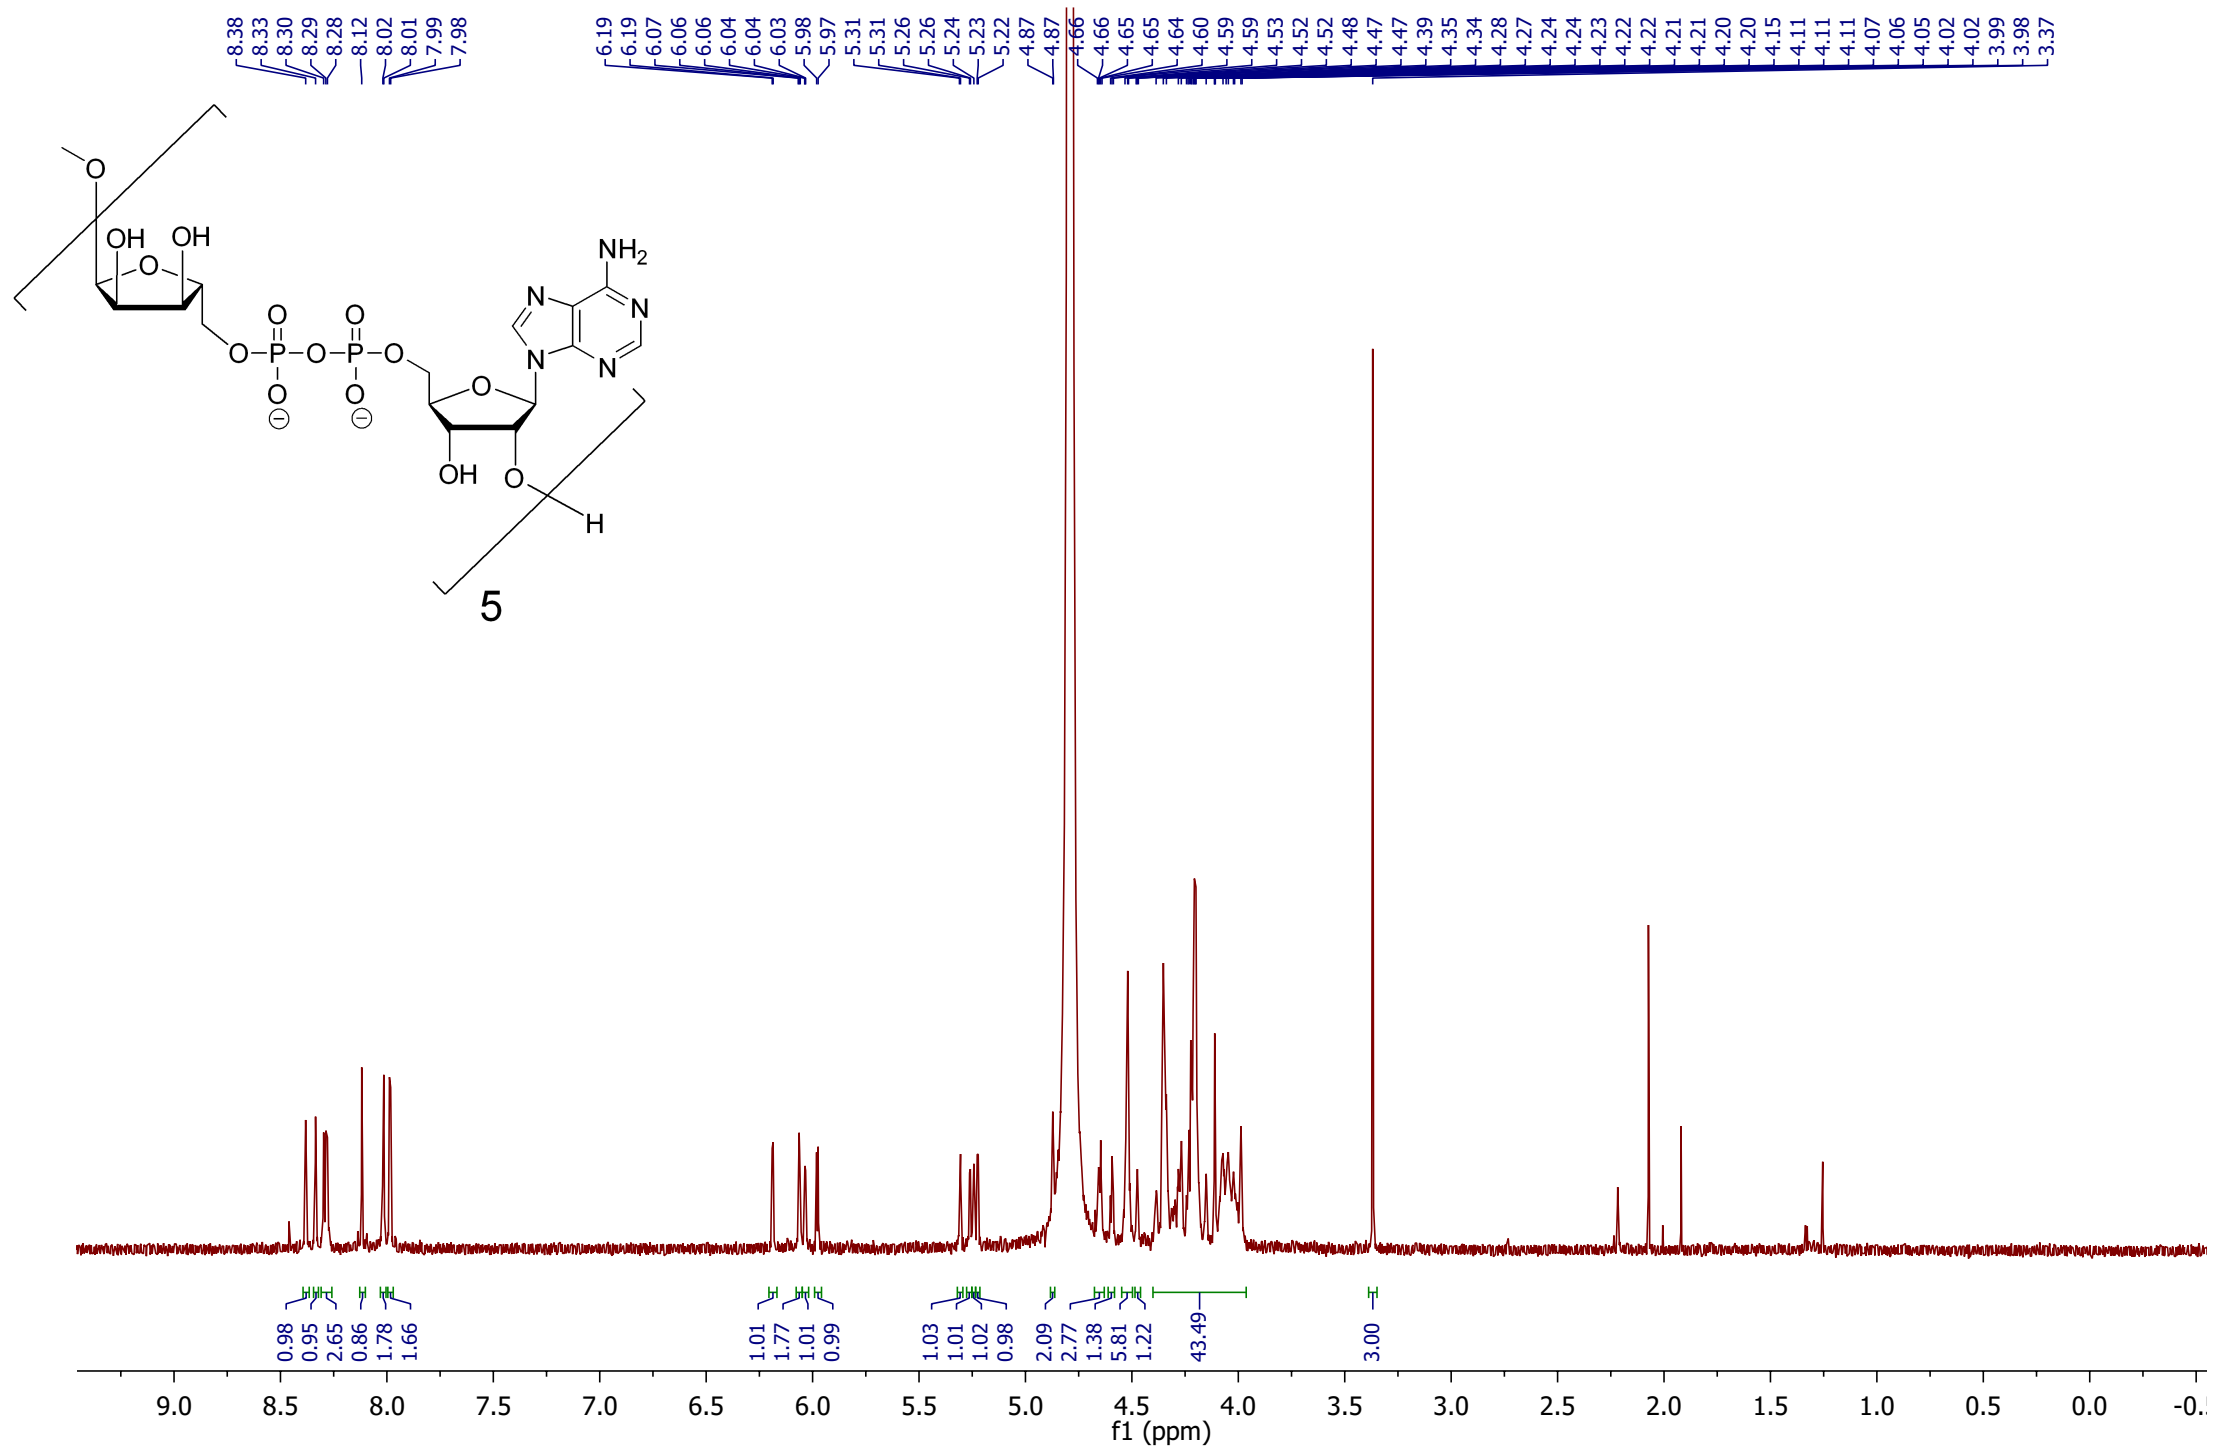

Compound **1d**,  $^1\text{H}$ -NMR,  $\text{D}_2\text{O}$ ,  $\text{H}_2\text{O}$  suppression, 850 MHz

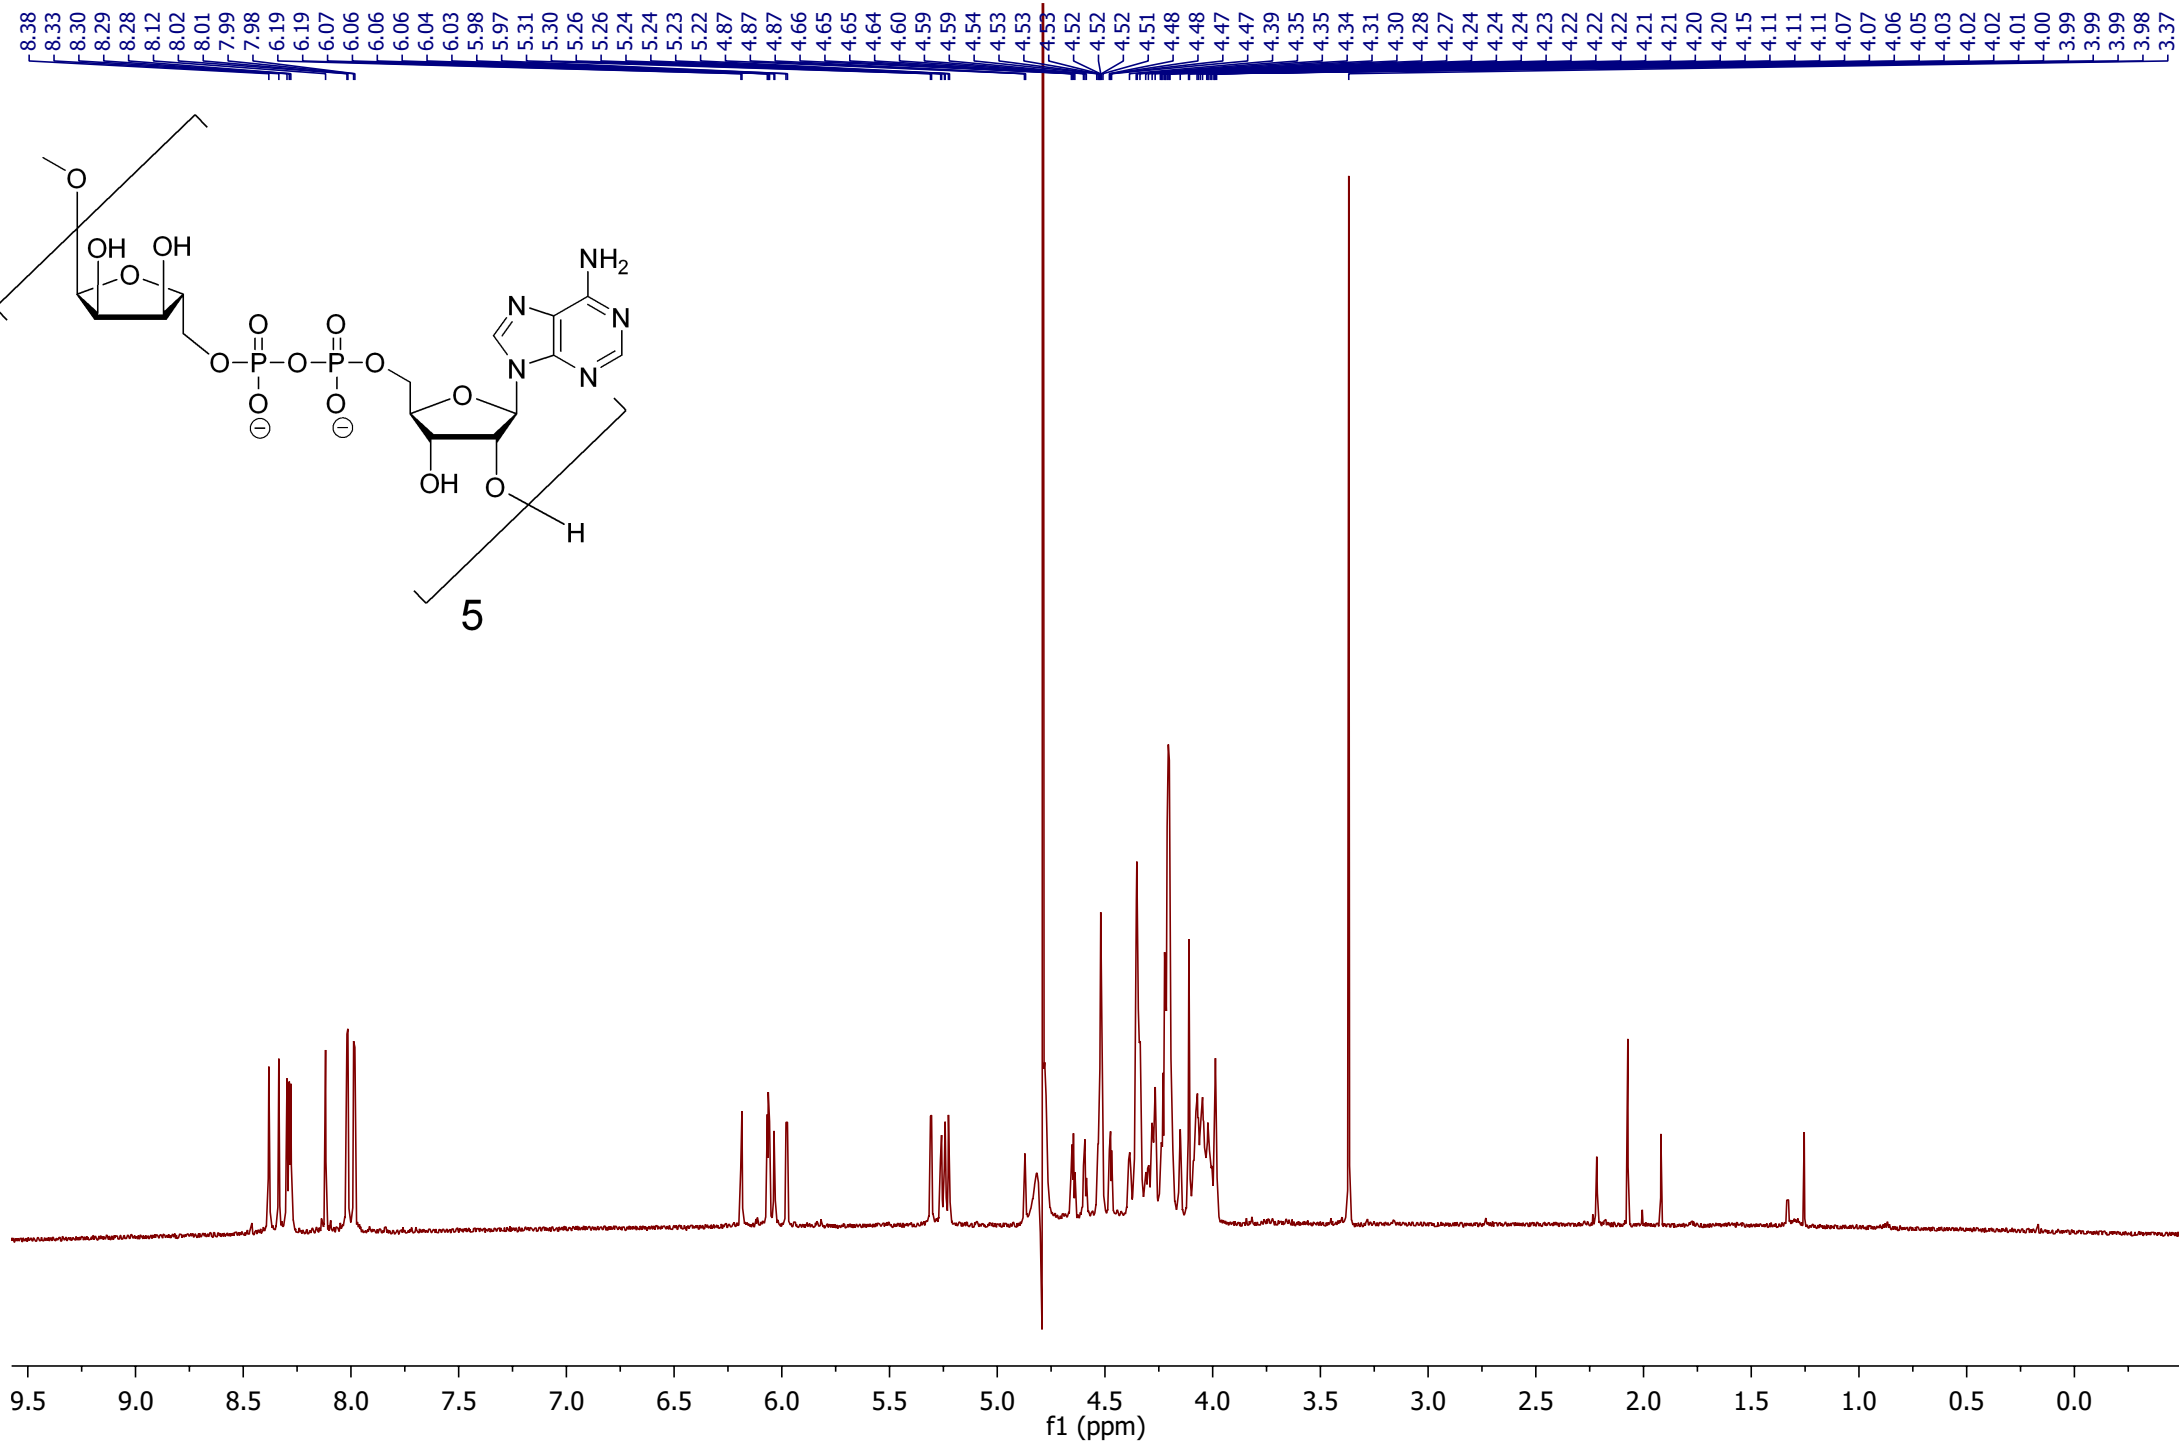

Compound **1d**,  $^{31}\text{P}$ -NMR,  $\text{D}_2\text{O}$ , 202 MHz

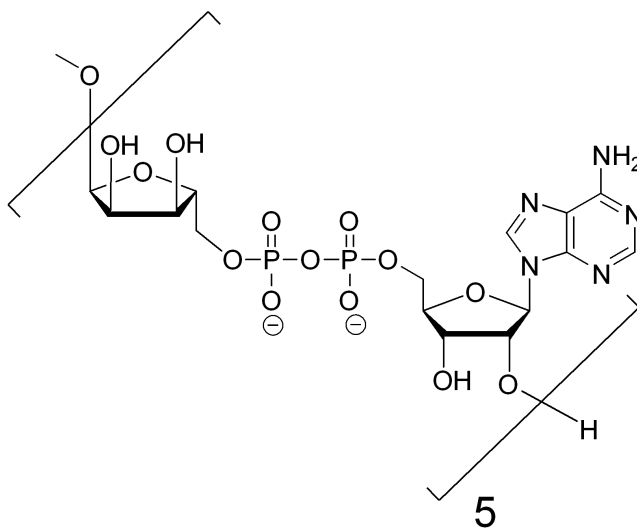

-11.10  
-11.10  
-11.12  
-11.21  
-11.25  
-11.31  
-11.36  
-11.45

-11.10  
-11.10  
-11.21  
-11.25  
-11.31  
-11.36  
-11.45

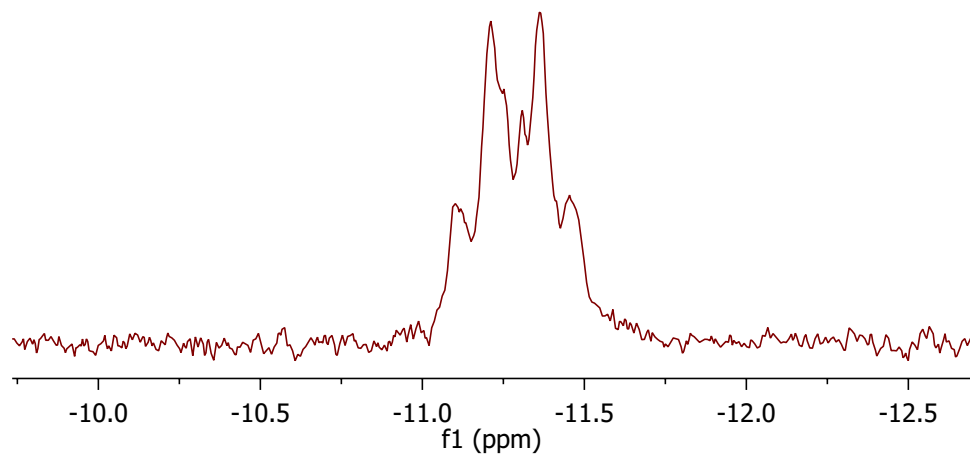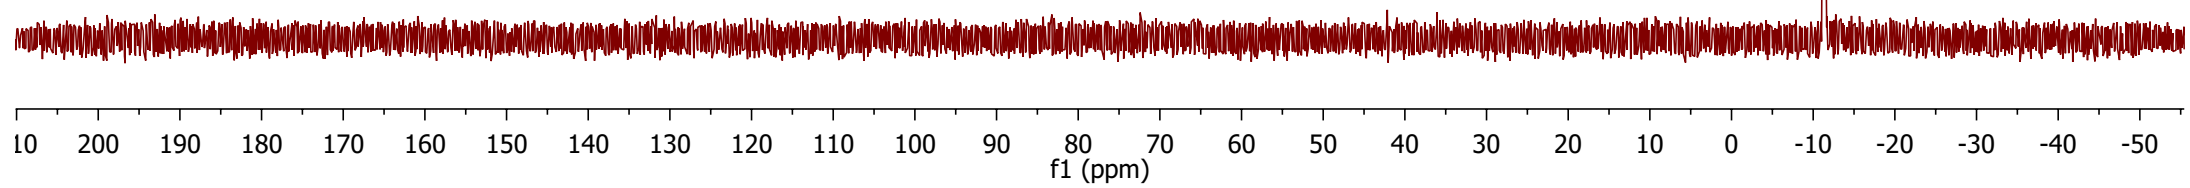

Compound **1d**, COSY, D<sub>2</sub>O, 850 MHz

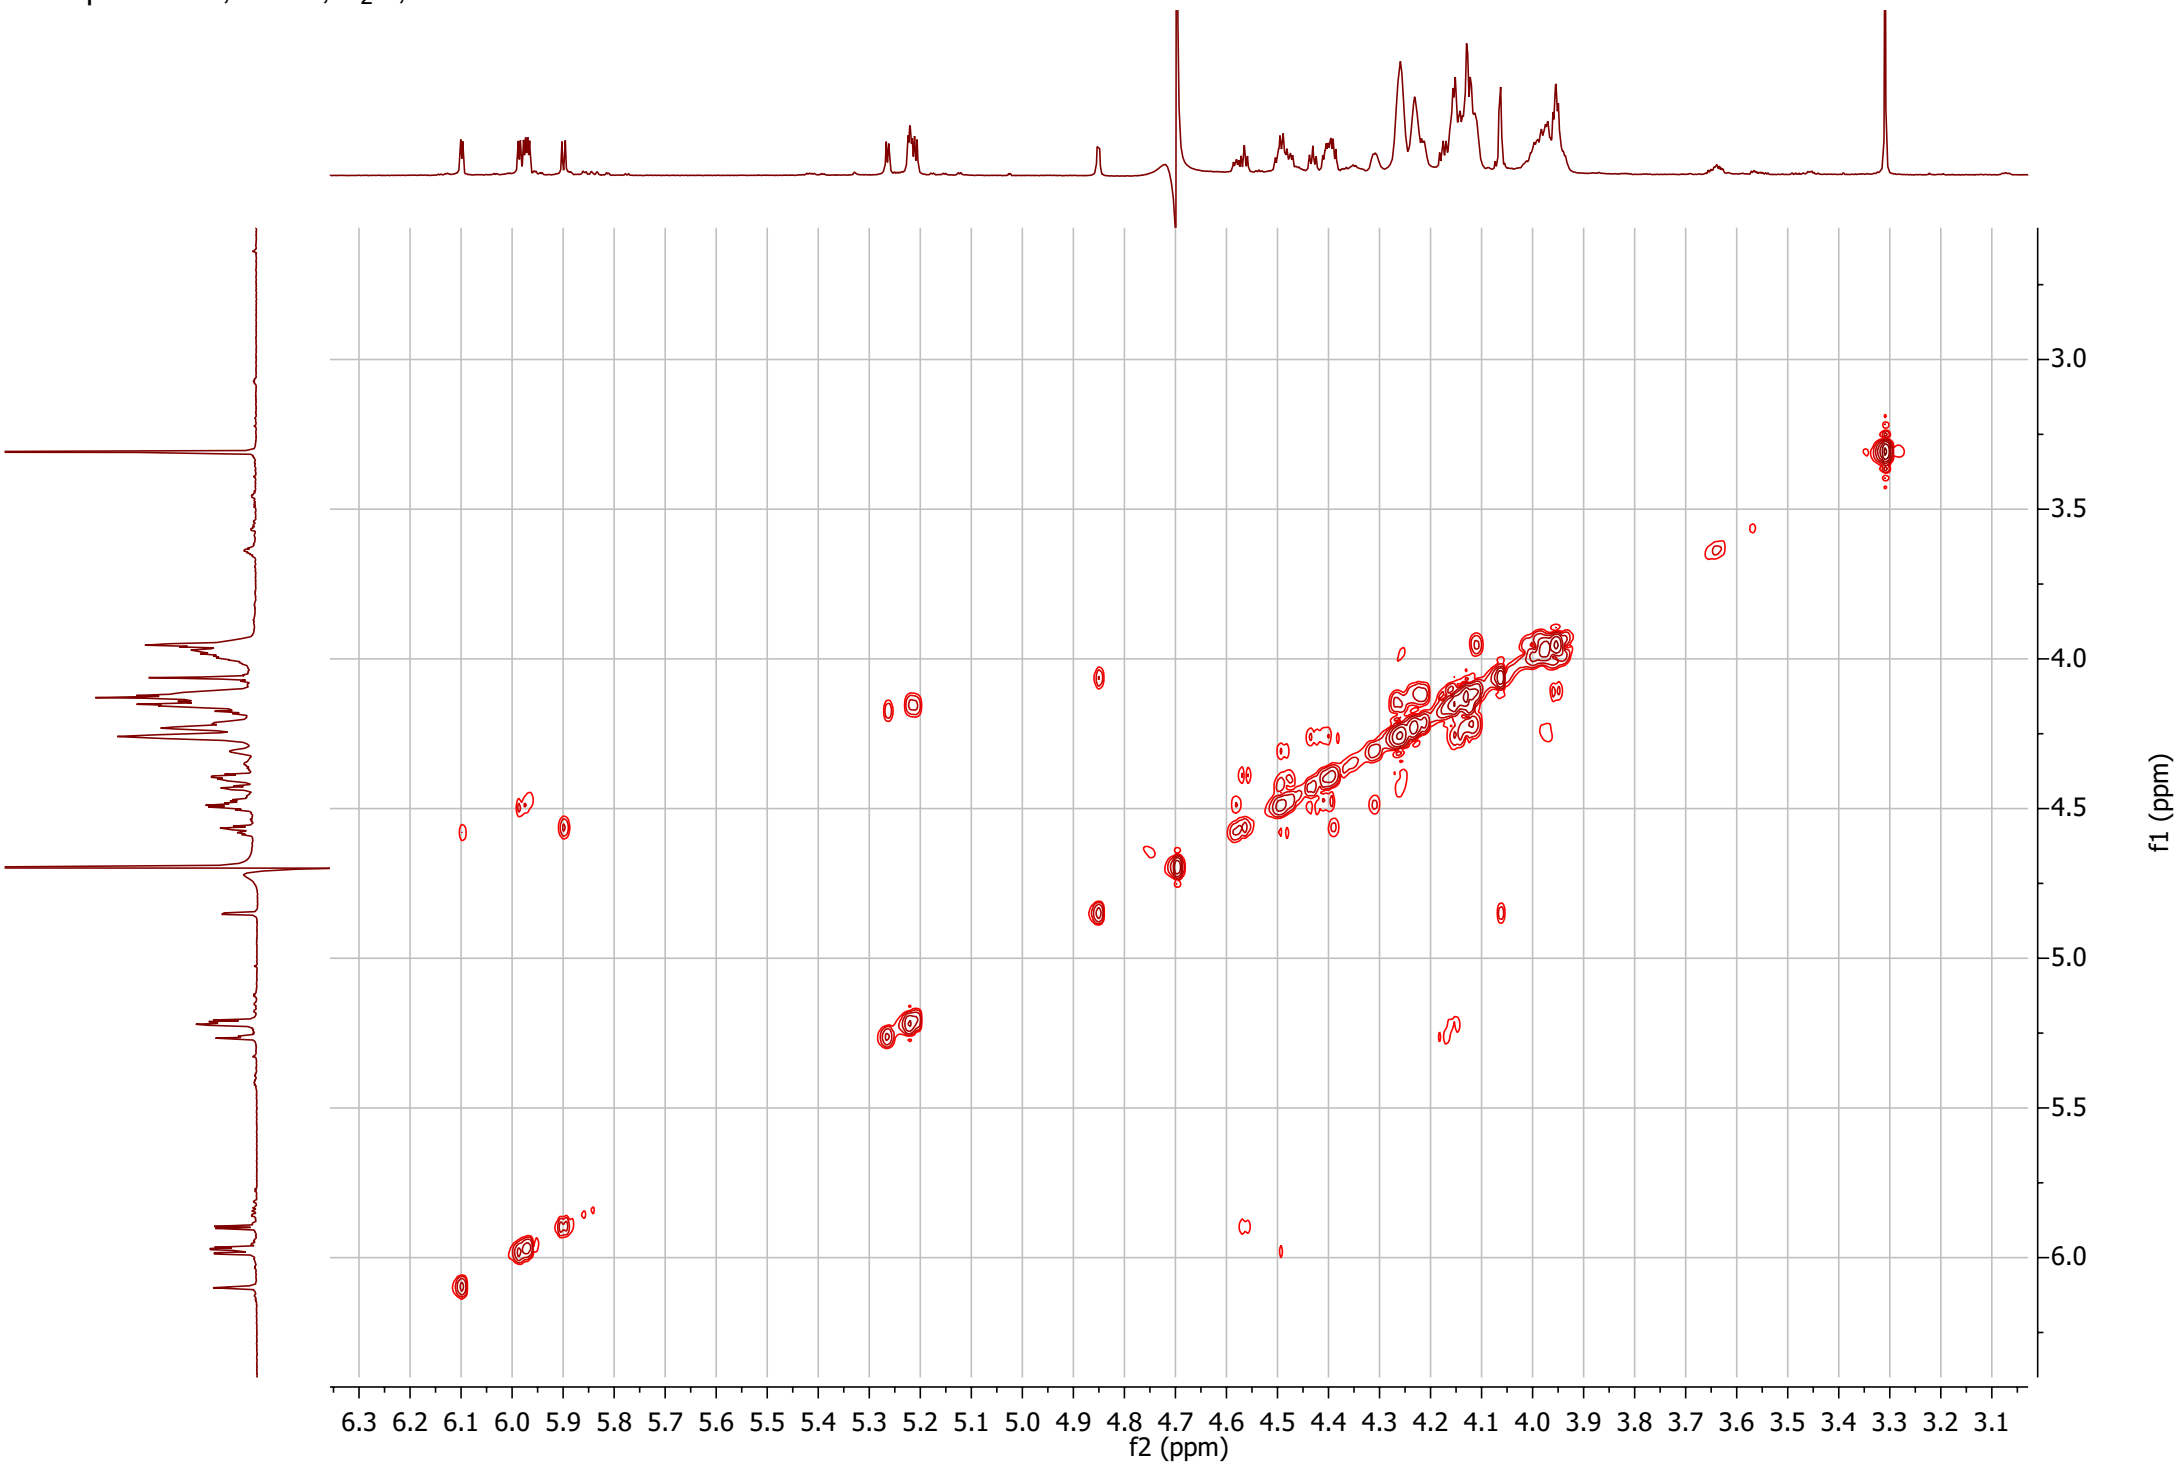

Supplement: SC-012-D1SC02340C-s002.pdf [file SC-012-D1SC02340C-s002.pdf]
